# Supplementary material for: Uncovering a mitochondrial unfolded protein response in corals and its role in adapting to a changing world
Source: Proc Biol Sci. 2019 Jun 26;286(1905):20190470. doi: 10.1098/rspb.2019.0470 (PMC6599992; doi:10.1098/rspb.2019.0470)
Supplement: Genes with ATF5 binding sites within their promoters [file rspb20190470supp4.xlsx]

## Sheet: Sheet1
comp	motif_id	Scaffold_Start_Stop	start	stop	strand	score	p.value	matched_sequence	NCBI_ID	loc_ID	Gene_ID	Protein
comp126535_c0_seq1	ATF5	NW_018150375.1:730374-731424	752	763	+	16.3394	1.46e-06	TAAGGGAGAGAG	XM_020744744.1	LOC110039614	GeneID:110039614	E3 ubiquitin-protein ligase HUWE1 (EC 2.3.2.26) (ARF-binding protein 1) (ARF-BP1) (HECT, UBA and WWE domain-containing protein 1) (HECT-type E3 ubiquitin transferase HUWE1) (Homologous to E6AP carboxyl terminus homologous protein 9) (HectH9) (Large structure of UREB1) (LASU1) (Mcl-1 ubiquitin ligase E3) (Mule) (Upstream regulatory element-binding protein 1) (URE-B1) (URE-binding protein 1)
comp125970_c0_seq1	ATF5	NW_018149603.1:389961-391011	573	584	-	11.5963	4.51e-05	AGAGGAAGAGGT	XM_020762388.1	LOC110055949	GeneID:110055949	DnaJ homolog subfamily A member 1
comp136221_c0_seq2	ATF5	NW_018149283.1:858673-859723	197	208	+	10.6514	7.86e-05	CAAGGACGAAGG	XM_020755801.1	LOC110049949	GeneID:110049949	ATP-dependent zinc metalloprotease FTSH 4, mitochondrial (AtFTSH4) (EC 3.4.24.-)
comp118953_c0_seq1	ATF5	NW_018149254.1:250848-251898	244	255	-	11.1009	6.07e-05	TTTGGAAGAGGG	XM_020755092.1	LOC110049301	GeneID:110049301	ATP synthase F(0) complex subunit B1, mitochondrial (ATP synthase peripheral stalk-membrane subunit b) (ATP synthase subunit b) (ATPase subunit b)
comp124193_c0_seq1	ATF5	NW_018150271.1:1193015-1194065	46	57	-	10.5963	8.08e-05	AAAGAGAGAAGT	XM_020774970.1	LOC110067626	GeneID:110067626	Trifunctional enzyme subunit beta, mitochondrial (TP-beta) [Includes: 3-ketoacyl-CoA thiolase (EC 2.3.1.16) (Acetyl-CoA acyltransferase) (Beta-ketothiolase)]
comp135074_c0_seq1	ATF5	NW_018149753.1:399090-400140	833	844	-	10.633	7.94e-05	TCAGGAAGAAAT	XM_020765659.1	LOC110058996	GeneID:110058996	Acyl-coenzyme A thioesterase THEM4 (Acyl-CoA thioesterase THEM4) (EC 3.1.2.2) (Thioesterase superfamily member 4)
comp121549_c0_seq2	ATF5	NW_018149470.1:411121-412171	411	422	-	10.7156	7.57e-05	TAAGGAACAATG	XM_020760401.1	LOC110054067	GeneID:110054067	NADH dehydrogenase [ubiquinone] 1 alpha subcomplex subunit 5 (Complex I subunit B13) (Complex I-13kD-B) (CI-13kD-B) (NADH-ubiquinone oxidoreductase 13 kDa-B subunit)
comp127812_c2_seq1	ATF5	NW_018149108.1:1082020-1083070	780	791	+	13.4587	1.34e-05	CAAGGAAGAGAG	XM_020752868.1	LOC110047127	GeneID:110047127	Carnitine O-palmitoyltransferase 1, liver isoform (CPT1-L) (EC 2.3.1.21) (Carnitine O-palmitoyltransferase I, liver isoform) (CPT I) (CPTI-L) (Carnitine palmitoyltransferase 1A)
comp119888_c0_seq1	ATF5	NW_018150087.1:1257242-1258292	646	657	-	11.0917	6.11e-05	TAATGAAGAAAT	XM_020770968.1	LOC110063971	GeneID:110063971	Alanine--glyoxylate aminotransferase 2, mitochondrial (AGT 2) (EC 2.6.1.44) ((R)-3-amino-2-methylpropionate--pyruvate transaminase) (EC 2.6.1.40) (Beta-ALAAT II) (Beta-alanine-pyruvate aminotransferase) (D-AIBAT)
comp133303_c0_seq10	ATF5	NW_018149352.1:353687-354737	755	766	+	10.4404	8.8e-05	CCAGGAAGAAGG	XM_020757661.1	LOC110051610	GeneID:110051610	Carnitine O-acetyltransferase (Carnitine acetylase) (EC 2.3.1.7) (Carnitine acetyltransferase) (CAT) (CrAT)
comp111019_c0_seq1	ATF5	NW_018149007.1:2224245-2225295	642	653	-	16.8165	6.75e-07	AAAGGAAGAAGG	XM_020751430.1	LOC110045800	GeneID:110045800	Succinate--CoA ligase [ADP/GDP-forming] subunit alpha, mitochondrial (EC 6.2.1.4) (EC 6.2.1.5) (Succinyl-CoA synthetase subunit alpha) (SCS-alpha) (Fragment)
comp133718_c0_seq2	ATF5	NW_018148842.1:805772-806822	151	162	+	12.8807	1.99e-05	TAAGGGAGACAC	XM_020748796.1	LOC110043348	GeneID:110043348	Mitochondrial import inner membrane translocase subunit TIM44
comp135822_c0_seq1	ATF5	NW_018149845.1:902621-903671	614	625	+	11.4404	4.97e-05	AATGGGAGAAAG	XM_020766971.1	LOC110060223	GeneID:110060223	Ketimine reductase mu-crystallin (EC 1.5.1.25) (CDK108) (NADP-regulated thyroid-hormone-binding protein)
comp136834_c0_seq1	ATF5	NW_018149374.1:1188233-1189283	231	242	-	10.367	9.05e-05	AAAGGCAGAGAT	XM_020758668.1	LOC110052539	GeneID:110052539	Kinesin-1 heavy chain (Conventional kinesin heavy chain) (Ubiquitous kinesin heavy chain) (UKHC)
comp135699_c0_seq1	ATF5	NW_018148547.1:4649-5699	593	604	+	15.5321	2.63e-06	TAAGGAAGAGAT	XM_020748734.1	LOC110043291	GeneID:110043291	Transmembrane protein 11, mitochondrial
comp135875_c0_seq1	ATF5	NW_018149382.1:1207503-1208553	807	818	-	14.2294	7.66e-06	TAAGGGAGAGTC	XM_020759057.1	LOC110052864	GeneID:110052864	E3 ubiquitin-protein ligase TRIM71 (EC 2.3.2.27) (Protein lin-41 homolog) (RING-type E3 ubiquitin transferase TRIM71) (Tripartite motif-containing protein 71)
comp111269_c0_seq1	ATF5	NW_018148615.1:1030605-1031655	504	515	+	13.5321	1.26e-05	TAAGGGCGAAGG	XM_020760817.1	LOC110054421	GeneID:110054421	Kelch-like protein diablo
comp111558_c0_seq1	ATF5	NW_018148767.1:727952-729002	319	330	-	11.6055	4.49e-05	AAAGGAAGAACT	XM_020746725.1	LOC110041443	GeneID:110041443	Alpha-1,3-mannosyl-glycoprotein 4-beta-N-acetylglucosaminyltransferase C (EC 2.4.1.145) (N-glycosyl-oligosaccharide-glycoprotein N-acetylglucosaminyltransferase IVc) (GnT-IVc) (N-acetylglucosaminyltransferase IVc) (UDP-N-acetylglucosamine: alpha-1,3-D-mannoside beta-1,4-N-acetylglucosaminyltransferase IVc)
comp134599_c3_seq3	ATF5	NW_018149096.1:61279-62329	769	780	+	10.2844	9.5e-05	AAATGTAGAGGG	XM_020752575.1	LOC110046859	GeneID:110046859	Ubiquitin carboxyl-terminal hydrolase 24 (EC 3.4.19.12) (Deubiquitinating enzyme 24) (Ubiquitin thioesterase 24) (Ubiquitin-specific-processing protease 24)
comp134624_c0_seq1	ATF5	NW_018148842.1:674475-675525	881	892	+	11.211	5.7e-05	CAAGGAAGACTG	XM_020748815.1	LOC110043366	GeneID:110043366	Ubiquitin-like protein 7
comp136525_c0_seq3	ATF5	NW_018150269.1:1379694-1380744	916	927	-	11.3578	5.22e-05	TAAGGGACACGG	XM_020774739.1	LOC110067416	GeneID:110067416	RING finger and CHY zinc finger domain-containing protein 1 (EC 2.3.2.27) (Androgen receptor N-terminal-interacting protein) (CH-rich-interacting match with PLAG1) (E3 ubiquitin-protein ligase Pirh2) (RING finger protein 199) (RING-type E3 ubiquitin transferase RCHY1) (Zinc finger protein 363) (p53-induced RING-H2 protein) (hPirh2)
comp127258_c0_seq1	ATF5	NW_018149062.1:490653-491703	400	411	+	11.844	3.89e-05	AAAGAAAGAGGG	XM_020752080.1	LOC110046388	GeneID:110046388	Heat shock protein beta-1 (HspB1) (25 kDa IAP) (Actin polymerization inhibitor) (Heat shock 25 kDa protein) (HSP 25) (Heat shock 27 kDa protein) (HSP 27)
comp107782_c0_seq1	ATF5	NW_018148670.1:787373-788423	414	425	+	10.9358	6.66e-05	AAATGAAGAGAG	XM_020767002.1	LOC110060246	GeneID:110060246	Cyclin-dependent kinase 10 (EC 2.7.11.22) (Cell division protein kinase 10)
comp122091_c0_seq1	ATF5	NW_018150389.1:177886-178936	432	443	-	10.7248	7.54e-05	TTAGGAAGAAAA	XM_020745196.1	LOC110040009	GeneID:110040009	E3 ubiquitin-protein ligase ARIH1 (EC 2.3.2.31) (Protein ariadne-1 homolog) (ARI-1) (RING-type E3 ubiquitin transferase ARIH1) (UbcH7-binding protein) (UbcM4-interacting protein 77) (Ubiquitin-conjugating enzyme E2-binding protein 1)
comp128051_c0_seq1	ATF5	NW_018149382.1:252408-253458	207	218	-	13.578	1.2e-05	AAAGGAAGACGA	XM_020758911.1	LOC110052746	GeneID:110052746	Cullin-3
comp114512_c0_seq1	ATF5	NW_018149177.1:198580-199630	207	218	+	10.7339	7.5e-05	TAAGGGGGAAAT	XM_020753993.1	LOC110048209	GeneID:110048209	Gamma-secretase subunit PEN-2 (Presenilin enhancer protein 2 homolog)
comp135222_c0_seq1	ATF5	NW_018149703.1:88428-89478	764	775	+	11.789	4.02e-05	GAAGgaagaata	XM_020764315.1	LOC110057733	GeneID:110057733	Kelch-like protein 8
comp137262_c1_seq1	ATF5	NW_018149764.1:453566-454616	459	470	-	11.5872	4.57e-05	GATGGGAGAGGT	XM_020765812.1	LOC110059129	GeneID:110059129	Epsin-2 (EPS-15-interacting protein 2)
comp133083_c0_seq2	ATF5	NW_018148839.1:425825-426875	989	1000	+	11.2018	5.75e-05	ATAGGGAGAAGA	XM_020748509.1	LOC110043093	GeneID:110043093	Thioredoxin domain-containing protein 5 (Endoplasmic reticulum resident protein 46) (ER protein 46) (ERp46) (Thioredoxin-like protein p46)
comp134114_c0_seq2	ATF5	NW_018148947.1:362846-363896	562	573	+	11.7523	4.14e-05	aaaggaacaagg	XM_020750637.1	LOC110045043	GeneID:110045043	Exostosin-2 (EC 2.4.1.224) (EC 2.4.1.225) (Protein sister of tout-velu)
comp132703_c0_seq1	ATF5	NW_018149766.1:387433-388483	894	905	-	11.3578	5.22e-05	TTAGGGAGAAAT	XM_020765875.1	LOC110059176	GeneID:110059176	E3 ubiquitin-protein ligase HECTD1 (EC 2.3.2.26) (E3 ligase for inhibin receptor) (EULIR) (HECT domain-containing protein 1) (HECT-type E3 ubiquitin transferase HECTD1)
comp133070_c0_seq1	ATF5	NW_018150064.1:1124148-1125198	252	263	+	13.8165	1.04e-05	TAAGGAAGAAcg	XM_020770478.1	LOC110063485	GeneID:110063485	Ubiquitin conjugation factor E4 A (EC 2.3.2.27) (RING-type E3 ubiquitin transferase E4 A)
comp96296_c0_seq1	ATF5	NW_018150050.1:1563267-1564317	667	678	-	14.5688	6.06e-06	TAAGGAAGAAAA	XM_020770260.1	LOC110063292	GeneID:110063292	Peptidyl-prolyl cis-trans isomerase C (PPIase C) (EC 5.2.1.8) (Cyclophilin C) (Rotamase C)
comp137215_c0_seq1	ATF5	NW_018149336.1:1344234-1345284	656	667	-	11.4954	4.8e-05	AAAGGGAGAACT	XM_020757340.1	LOC110051302	GeneID:110051302	TNF receptor-associated factor 3 (EC 2.3.2.27) (CD40 receptor-associated factor 1) (CRAF1) (RING-type E3 ubiquitin transferase TRAF3) (TRAFAMN)
comp131713_c2_seq4	ATF5	NW_018149324.1:947606-948656	512	523	+	10.6972	7.67e-05	taaggcAGAAAC	XM_020756863.1	LOC110050889	GeneID:110050889	Nuclear factor NF-kappa-B p105 subunit (DNA-binding factor KBF1) (EBP-1) (Nuclear factor of kappa light polypeptide gene enhancer in B-cells 1) [Cleaved into: Nuclear factor NF-kappa-B p50 subunit]
comp131713_c2_seq2	ATF5	NW_018149324.1:947606-948656	512	523	+	10.6972	7.67e-05	taaggcAGAAAC	XM_020756863.1	LOC110050889	GeneID:110050889	Nuclear factor NF-kappa-B p105 subunit (DNA-binding factor KBF1) (EBP-1) (Nuclear factor of kappa light polypeptide gene enhancer in B-cells 1) [Cleaved into: Nuclear factor NF-kappa-B p50 subunit]
comp121283_c0_seq1	ATF5	NW_018150231.1:785911-786961	701	712	+	10.2936	9.46e-05	CAAGGAAGACTT	XM_020773949.1	LOC110066706	GeneID:110066706	Mitogen-activated protein kinase 6 (MAP kinase 6) (MAPK 6) (EC 2.7.11.24) (Extracellular signal-regulated kinase 3) (ERK-3)
comp126490_c0_seq1	ATF5	NW_018150368.1:260917-261967	301	312	-	11.6055	4.49e-05	AAAGGGAAAGGG	XM_020777227.1	LOC110069694	GeneID:110069694	Acid sphingomyelinase-like phosphodiesterase 3b (ASM-like phosphodiesterase 3b) (EC 3.1.4.-)
comp130637_c2_seq8	ATF5	NW_018149283.1:1752295-1753345	916	927	-	11.7982	3.99e-05	CAAGGAAGAGAA	XM_020755849.1	LOC110049990	GeneID:110049990	TNF receptor-associated factor 4 (Cysteine-rich domain associated with RING and Traf domains protein 1) (Metastatic lymph node gene 62 protein) (MLN 62) (RING finger protein 83)
comp133526_c0_seq1	ATF5	NW_018150233.1:137203-138253	737	748	+	13.2844	1.51e-05	GAAGGAAGACGT	XM_020774085.1	LOC110066838	GeneID:110066838	Dual specificity mitogen-activated protein kinase kinase 1 (MAP kinase kinase 1) (MAPKK 1) (EC 2.7.12.2) (ERK activator kinase 1) (MAPK/ERK kinase 1) (MEK1) (Fragment)
comp99574_c0_seq1	ATF5	NW_018150121.1:1062597-1063647	685	696	-	11.8165	3.96e-05	TGAGGGAGAAGC	XM_020771941.1	LOC110064837	GeneID:110064837	Protein PLANT CADMIUM RESISTANCE 1 (AtPCR1)
comp133786_c0_seq1	ATF5	NW_018148627.1:836284-837334	988	999	+	13.9083	9.99e-06	AAAGGGAGAAAT	XM_020763259.1	LOC110056740	GeneID:110056740	Selenoprotein M (SelM)
comp124681_c0_seq1	ATF5	NW_018149326.1:107036-108086	547	558	-	11.6514	4.41e-05	AAAGGACGAGGT	XM_020756994.1	LOC110051021	GeneID:110051021	Cytochrome b-245 light chain (Cytochrome b(558) alpha chain) (Cytochrome b558 subunit alpha) (Neutrophil cytochrome b 22 kDa polypeptide) (Superoxide-generating NADPH oxidase light chain subunit) (p22 phagocyte B-cytochrome) (p22-phox) (p22phox)
comp128771_c1_seq1	ATF5	NW_018149136.1:153317-154367	929	940	-	10.2294	9.85e-05	CAAGGATGAAGC	XM_020753558.1	LOC110047816	GeneID:110047816	Carbonyl reductase [NADPH] 1 (EC 1.1.1.184) (15-hydroxyprostaglandin dehydrogenase [NADP(+)]) (EC 1.1.1.197) (20-beta-hydroxysteroid dehydrogenase) (NADPH-dependent carbonyl reductase 1) (Prostaglandin 9-ketoreductase) (Prostaglandin-E(2) 9-reductase) (EC 1.1.1.189)
comp133786_c0_seq4	ATF5	NW_018148627.1:836284-837334	988	999	+	13.9083	9.99e-06	AAAGGGAGAAAT	XM_020763259.1	LOC110056740	GeneID:110056740	Selenoprotein M (SelM)
comp123955_c0_seq1	ATF5	NW_018148843.1:884653-885703	468	479	-	11.422	5.03e-05	GAAGGGGGAGGG	XM_020748906.1	LOC110043459	GeneID:110043459	Copper transport protein ATOX1 (Metal transport protein ATX1)
comp135856_c0_seq1	ATF5	NW_018148537.1:862701-863751	763	774	-	14.0183	9.09e-06	AAAGGAAGAAAT	XM_020747732.1	LOC110042366	GeneID:110042366	Multidrug resistance-associated protein 4 (ATP-binding cassette sub-family C member 4) (MRP/cMOAT-related ABC transporter) (Multi-specific organic anion transporter B) (MOAT-B)
comp118999_c0_seq1	ATF5	NW_018149776.1:1003735-1004785	964	975	+	10.789	7.27e-05	tgagGAAGAAAT	XM_020766357.1	LOC110059634	GeneID:110059634	Microsomal glutathione S-transferase 3 (Microsomal GST-3) (EC 2.5.1.18) (Microsomal GST-III)
comp133444_c0_seq3	ATF5	NW_018149128.1:257131-258181	413	424	+	11.1284	5.96e-05	TAAGGAAAAAGA	XM_020753267.1	LOC110047515	GeneID:110047515	Glyoxylate reductase/hydroxypyruvate reductase (EC 1.1.1.79) (EC 1.1.1.81)
comp131697_c0_seq1	ATF5	NW_018150375.1:1248445-1249495	697	708	+	13.3486	1.44e-05	caagggagagag	XM_020744914.1	LOC110039763	GeneID:110039763	17-beta-hydroxysteroid dehydrogenase type 6 (17-beta-HSD 6) (17-beta-HSD6) (EC 1.1.1.105) (EC 1.1.1.239) (EC 1.1.1.62) (3-alpha->beta-hydroxysteroid epimerase) (3-alpha->beta-HSE) (Oxidative 3-alpha hydroxysteroid dehydrogenase) (Short chain dehydrogenase/reductase family 9C member 6)
comp122772_c0_seq1	ATF5	NW_018149326.1:431511-432561	685	696	-	10.4771	8.57e-05	ACAGGAAGAAGA	XM_020757001.1	LOC110051029	GeneID:110051029	SAP30-binding protein (Transcriptional regulator protein HCNGP)
comp136675_c1_seq13	ATF5	NW_018150087.1:23288-24338	786	797	+	13.4954	1.28e-05	aaagGAAGAGAC	XM_020770951.1	LOC110063956	GeneID:110063956	Sorting nexin-14
comp135422_c0_seq1	ATF5	NW_018148753.1:817377-818427	498	509	-	10.7523	7.4e-05	TATGGTAGAGGA	XM_020746391.1	LOC110041118	GeneID:110041118	Serine/threonine-protein phosphatase 4 regulatory subunit 2 (PPP4R2-related protein)
comp135995_c0_seq1	ATF5	NW_018148737.1:527455-528505	372	383	+	10.6422	7.89e-05	GAATGAAGAAGt	XM_020746129.1	LOC110040862	GeneID:110040862	Organic cation transporter protein
comp130513_c0_seq1	ATF5	NW_018149452.1:474421-475471	871	882	+	10.7248	7.54e-05	TTAGGAAGAAAA	XM_020760154.1	LOC110053852	GeneID:110053852	CUB and sushi domain-containing protein 1 (CUB and sushi multiple domains protein 1)
comp37912_c0_seq1	ATF5	NW_018148831.1:719139-720189	561	572	-	10.7248	7.54e-05	TTAGGAAGAAAA	XM_020748390.1	LOC110042999	GeneID:110042999	Syntaxin-6
comp131549_c0_seq1	ATF5	NW_018149670.1:389401-390451	395	406	+	10.9083	6.8e-05	AAAggacgaggc	XM_020763853.1	LOC110057262	GeneID:110057262	Protein ERGIC-53 (ER-Golgi intermediate compartment 53 kDa protein) (Lectin mannose-binding 1) (p58)
comp130406_c0_seq3	ATF5	NW_018149766.1:154816-155866	611	622	+	11.8165	3.96e-05	AAAGGGTgagag	XM_020765981.1	LOC110059281	GeneID:110059281	Peflin (PEF protein with a long N-terminal hydrophobic domain) (Penta-EF hand domain-containing protein 1)
comp116928_c0_seq1	ATF5	NW_018148815.1:138253-139303	86	97	-	10.6881	7.74e-05	AAAGGAGGAAGA	XM_020747601.1	LOC110042248	GeneID:110042248	Sorting nexin-24
comp135578_c0_seq1	ATF5	NW_018149519.1:535071-536121	356	367	-	10.633	7.94e-05	AGAGGAAGAGAG	XM_020761403.1	LOC110055022	GeneID:110055022	Sorting nexin-10A
comp126562_c1_seq1	ATF5	NW_018149689.1:270508-271558	636	647	+	10.7982	7.24e-05	AAAGGAAAAGGT	XM_020764125.1	LOC110057530	GeneID:110057530	Transmembrane emp24 domain-containing protein 1 (p24 family protein gamma-1) (p24gamma1)
comp135684_c0_seq1	ATF5	NW_018149995.1:317005-318055	851	862	-	13.4312	1.39e-05	TAAGGAAGATGT	XM_020769518.1	LOC110062592	GeneID:110062592	GRIP and coiled-coil domain-containing protein 1 (Golgi coiled-coil protein 1)
comp119229_c0_seq1	ATF5	NW_018149716.1:1147475-1148525	794	805	-	11.6697	4.33e-05	GAAGGTAGACGG	XM_020764982.1	LOC110058341	GeneID:110058341	Intraflagellar transport protein 27 homolog (IFT27) (Putative GTP-binding protein RAY-like) (Rab-like protein 4)
comp127616_c1_seq1	ATF5	NW_018149655.1:305619-306669	268	279	+	10.3486	9.2e-05	taatgaagaaaa	XM_020763663.1	LOC110057077	GeneID:110057077	Tripartite motif-containing protein 3 (RING finger protein 22) (RING finger protein HAC1)
comp126227_c0_seq1	ATF5	NW_018148822.1:2035570-2036620	652	663	+	13.0642	1.75e-05	TATGGAAGAAGA	XM_020747772.1	LOC110042408	GeneID:110042408	Protein cornichon homolog 4 (CNIH-4) (Cornichon family AMPA receptor auxiliary protein 4)
comp120334_c0_seq2	ATF5	NW_018150087.1:925249-926299	37	48	-	11.367	5.19e-05	GGAGGGAGAGGG	XM_020770999.1	LOC110063996	GeneID:110063996	Lysophospholipid acyltransferase 7 (LPLAT 7) (EC 2.3.1.-) (1-acylglycerophosphatidylinositol O-acyltransferase) (EC 2.3.1.n4) (Bladder and breast carcinoma-overexpressed gene 1 protein) (Leukocyte receptor cluster member 4) (Lysophosphatidylinositol acyltransferase) (LPIAT) (Lyso-PI acyltransferase) (Membrane-bound O-acyltransferase domain-containing protein 7) (O-acyltransferase domain-containin…
comp134810_c3_seq2	ATF5	NW_018149640.1:1300023-1301073	854	865	+	10.6606	7.83e-05	TAATGTAGAGGT	XM_020762954.1	LOC110056474	GeneID:110056474	Sterol regulatory element-binding protein 1 (SREBP-1) (Sterol regulatory element-binding transcription factor 1) [Cleaved into: Processed sterol regulatory element-binding protein 1]
comp134981_c0_seq1	ATF5	NW_018150091.1:835095-836145	567	578	+	10.4404	8.8e-05	TAATGTAGAAGT	XM_020771255.1	LOC110064239	GeneID:110064239	ATP-binding cassette sub-family A member 2 (ATP-binding cassette transporter 2) (ATP-binding cassette 2)
comp121159_c0_seq2	ATF5	NW_018149374.1:2802640-2803690	1032	1043	-	10.6422	7.89e-05	TAATGAAGAATT	XM_020758681.1	LOC110052551	GeneID:110052551	Forkhead box protein O1-B
comp136969_c0_seq1	ATF5	NW_018148553.1:85949-86999	713	724	+	13.6789	1.14e-05	CAAGGAAGAGGA	XR_002296253.1	LOC110045522	GeneID:110045522	Peroxisomal acyl-coenzyme A oxidase 1 (AOX) (EC 1.3.3.6) (Palmitoyl-CoA oxidase)
comp131359_c0_seq2	ATF5	NW_018149300.1:149624-150674	1006	1017	-	11.7615	4.13e-05	GAAGGGAGACTG	XM_020756020.1	LOC110050136	GeneID:110050136	Phospholipase ABHD3 (EC 3.1.1.32) (EC 3.1.1.4) (Abhydrolase domain-containing protein 3)
comp132500_c0_seq1	ATF5	NW_018148670.1:2738085-2739135	109	120	-	12.7798	2.15e-05	TAAGGTAGAAAT	XM_020768838.1	LOC110061955	GeneID:110061955	Zinc finger CCCH domain-containing protein 6
comp131995_c0_seq4	ATF5	NW_018149416.1:222169-223219	802	813	+	13.4954	1.28e-05	aaaggaagagaa	XM_020759487.1	LOC110053274	GeneID:110053274	Eukaryotic translation initiation factor 4H (eIF-4H)
comp120924_c0_seq1	ATF5	NW_018150220.1:437502-438552	785	796	-	12.9174	1.93e-05	TAAGAAAGAAGG	XM_020773543.1	LOC110066323	GeneID:110066323	PHD finger protein 20-like protein 1
comp135781_c0_seq1	ATF5	NW_018148940.1:595617-596667	75	86	+	11.8165	3.96e-05	TATGGGAGAAAT	XM_020750027.1	LOC110044475	GeneID:110044475	snRNA-activating protein complex subunit 1 (SNAPc subunit 1) (Small nuclear RNA-activating complex polypeptide 1) (snRNA-activating protein complex 43 kDa subunit) (SNAPc 43 kDa subunit)
comp131285_c0_seq1	ATF5	NW_018149283.1:363966-365016	157	168	-	11.0734	6.14e-05	TATGGGAGAAAC	XM_020755912.1	LOC110050045	GeneID:110050045	40S ribosomal protein S27-like
comp125847_c0_seq1	ATF5	NW_018150121.1:1555914-1556964	848	859	-	12.1468	3.19e-05	TATGGAAGAGAT	XM_020771819.1	LOC110064725	GeneID:110064725	MBT domain-containing protein 1
comp133447_c0_seq1	ATF5	NW_018150181.1:472741-473791	593	604	+	11.2294	5.65e-05	taagggtgaaaa	XM_020772819.1	LOC110065663	GeneID:110065663	Transcription elongation factor SPT6 (hSPT6) (Histone chaperone suppressor of Ty6) (Tat-cotransactivator 2 protein) (Tat-CT2 protein)
comp122604_c0_seq1	ATF5	NW_018149745.1:788867-789917	301	312	+	15.2385	3.19e-06	AAAGGAAGACGG	XM_020765608.1	LOC110058938	GeneID:110058938	Core histone macro-H2A.1 (Histone macroH2A1) (mH2A1) (H2A.y) (H2A/y)
comp62645_c0_seq1	ATF5	NW_018149691.1:454643-455693	361	372	-	10.8899	6.88e-05	TAAGGATGAATC	XM_020764165.1	LOC110057573	GeneID:110057573	Aminoacyl tRNA synthase complex-interacting multifunctional protein 1 (Multisynthase complex auxiliary component p43) [Cleaved into: Endothelial monocyte-activating polypeptide 2 (EMAP-2) (Endothelial monocyte-activating polypeptide II) (EMAP-II) (Small inducible cytokine subfamily E member 1)]
comp132322_c1_seq2	ATF5	NW_018150242.1:1605963-1607013	1031	1042	-	10.3486	9.2e-05	TAATGAAGAAAA	XM_020774230.1	LOC110066965	GeneID:110066965	Putative Polycomb group protein ASXL3 (Additional sex combs-like protein 3)
comp114406_c0_seq1	ATF5	NW_018149159.1:786932-787982	529	540	+	12.2385	3.02e-05	GAAGGAAGAAAA	XM_020753851.1	LOC110048079	GeneID:110048079	E3 ubiquitin-protein ligase TRIM71 (EC 2.3.2.27) (Protein lin-41 homolog) (mLin41) (RING-type E3 ubiquitin transferase TRIM71) (Tripartite motif-containing protein 71)
comp136470_c0_seq5	ATF5	NW_018149378.1:817075-818125	101	112	-	11.4404	4.97e-05	TAAGGGAGATAT	XM_020758778.1	LOC110052634	GeneID:110052634	Lysine-specific demethylase 6A (EC 1.14.11.-) (Histone demethylase UTX) (Ubiquitously-transcribed TPR protein on the X chromosome) (Ubiquitously-transcribed X chromosome tetratricopeptide repeat protein)
comp114390_c0_seq1	ATF5	NW_018148670.1:2915804-2916854	195	206	-	11.3578	5.22e-05	TTAGGGAGAAAT	XM_020769572.1	LOC110062628	GeneID:110062628	Nuclear valosin-containing protein-like (NVLp) (Nuclear VCP-like protein)
comp136437_c0_seq1	ATF5	NW_018148947.1:1373765-1374815	143	154	-	11.5963	4.51e-05	AGAGGAAGAGGT	XM_020750594.1	LOC110045007	GeneID:110045007	Helicase with zinc finger domain 2 (ATP-dependent helicase PRIC285) (Helicase with zinc finger 2, transcriptional coactivator) (PPAR-alpha-interacting complex protein 285) (PPAR-gamma DNA-binding domain-interacting protein 1) (PDIP1) (PPAR-gamma DBD-interacting protein 1) (Peroxisomal proliferator-activated receptor A-interacting complex 285 kDa protein) (EC 3.6.4.-)
comp136391_c0_seq2	ATF5	NW_018149561.1:484055-485105	106	117	+	13.2385	1.57e-05	CAAGGAAGAAAG	XM_020762037.1	LOC110055659	GeneID:110055659	Helicase with zinc finger domain 2 (ATP-dependent helicase PRIC285) (Helicase with zinc finger 2, transcriptional coactivator) (PPAR-alpha-interacting complex protein 285) (PPAR-gamma DNA-binding domain-interacting protein 1) (PDIP1) (PPAR-gamma DBD-interacting protein 1) (Peroxisomal proliferator-activated receptor A-interacting complex 285 kDa protein) (EC 3.6.4.-)
comp129800_c0_seq1	ATF5	NW_018150091.1:1399989-1401039	506	517	+	10.9174	6.74e-05	TAAGGCAGAGAA	XM_020771350.1	LOC110064313	GeneID:110064313	Lysosome membrane protein 2 (85 kDa lysosomal membrane sialoglycoprotein) (LGP85) (CD36 antigen-like 2) (Lysosome membrane protein II) (LIMP II) (Scavenger receptor class B member 2) (CD antigen CD36)
comp118249_c0_seq1	ATF5	NW_018149896.1:2246515-2247565	416	427	+	14.9358	4.35e-06	aaaggaagaaag	XM_020767744.1	LOC110060937	GeneID:110060937	Glutamate--cysteine ligase regulatory subunit (GCS light chain) (Gamma-ECS regulatory subunit) (Gamma-glutamylcysteine synthetase regulatory subunit) (Glutamate--cysteine ligase modifier subunit)
comp130591_c0_seq1	ATF5	NW_018150121.1:1714454-1715504	839	850	-	10.3486	9.2e-05	TAATGAAGAAAA	XM_020771857.1	LOC110064758	GeneID:110064758	Probable ATP-dependent RNA helicase DDX46 (EC 3.6.4.13) (DEAD box protein 46) (PRP5 homolog)
comp73508_c0_seq1	ATF5	NW_018148814.1:27271-28321	30	41	+	15.0459	4.01e-06	AAAGGGAGAAGA	XM_020747527.1	LOC110042169	GeneID:110042169	Elongation factor Tu (EF-Tu)
comp128825_c1_seq1	ATF5	NW_018148670.1:3152071-3153121	410	421	+	11.9266	3.68e-05	TGAGGAAGAAGA	XM_020768915.1	LOC110062028	GeneID:110062028	CCR4-NOT transcription complex subunit 2 (CCR4-associated factor 2)
comp127744_c0_seq4	ATF5	NW_018150285.1:1279616-1280666	347	358	-	11.0642	6.17e-05	AAAGGCAGAAAG	XM_020775444.1	LOC110068075	GeneID:110068075	60S ribosomal protein L36
comp136595_c0_seq2	ATF5	NW_018150154.1:1239065-1240115	213	224	-	14.2294	7.66e-06	GAAGGGAGAGGC	XM_020772369.1	LOC110065260	GeneID:110065260	Transcription factor SOX-14
comp127919_c0_seq1	ATF5	NW_018148839.1:1240040-1241090	897	908	-	10.3119	9.36e-05	TGTGGGAGAGGG	XM_020748729.1	LOC110043288	GeneID:110043288	Deoxynucleotidyltransferase terminal-interacting protein 2 (Estrogen receptor-binding protein) (LPTS-interacting protein 2) (LPTS-RP2) (Terminal deoxynucleotidyltransferase-interacting factor 2) (TdIF2) (TdT-interacting factor 2)
comp119976_c0_seq1	ATF5	NW_018148775.1:1184605-1185655	311	322	-	12.5505	2.5e-05	TAAGGTAGAGTT	XM_020746993.1	LOC110041684	GeneID:110041684	Protein atonal homolog 1
comp127059_c0_seq1	ATF5	NW_018150019.1:348965-350015	778	789	-	12.2385	3.02e-05	GAAGGAAGAAAA	XM_020769761.1	LOC110062818	GeneID:110062818	Polymerase delta-interacting protein 3 (46 kDa DNA polymerase delta interaction protein) (p46) (S6K1 Aly/REF-like target) (SKAR)
comp136492_c1_seq1	ATF5	NW_018150302.1:93295-94345	900	911	+	14.4587	6.51e-06	taaggGAGAAAA	XM_020776174.1	LOC110068766	GeneID:110068766	Homeobox protein not2 (Xnot-2) (Xnot2)
comp127209_c0_seq1	ATF5	NW_018148829.1:1574221-1575271	606	617	+	14.0183	9.09e-06	AAAGGAAGAAAT	XM_020748241.1	LOC110042859	GeneID:110042859	Eukaryotic translation initiation factor 5A-1 (eIF-5A-1) (eIF-5A1) (Eukaryotic initiation factor 5A isoform 1) (eIF-5A) (eIF-4D)
comp135923_c0_seq1	ATF5	NW_018149351.1:1153614-1154664	741	752	+	14.6789	5.61e-06	TAAGGGAGAGAA	XM_020757572.1	LOC110051534	GeneID:110051534	BAH and coiled-coil domain-containing protein 1 (Bromo adjacent homology domain-containing protein 2) (BAH domain-containing protein 2)
comp119519_c0_seq1	ATF5	NW_018149847.1:455800-456850	740	751	-	11.7706	4.1e-05	TCAGGAAGAGAG	XM_020767121.1	LOC110060355	GeneID:110060355	Mucin-like protein (Fragment)
comp132721_c0_seq1	ATF5	NW_018149766.1:2074200-2075250	285	296	-	10.7982	7.24e-05	AAAGGGGGAGGA	XM_020765941.1	LOC110059237	GeneID:110059237	Tubulin-specific chaperone cofactor E-like protein (Leucine-rich repeat-containing protein 35)
comp77265_c0_seq1	ATF5	NW_018149816.1:868117-869167	385	396	-	10.6881	7.74e-05	AAAGGAGGAAGA	XM_020766739.1	LOC110060014	GeneID:110060014	Actin-related protein 2/3 complex subunit 3 (Arp2/3 complex 21 kDa subunit) (p21-ARC)
comp135739_c0_seq1	ATF5	NW_018150366.1:154479-155529	279	290	+	11.6972	4.26e-05	AAAGGAAGACAA	XR_002298929.1	LOC110069662	GeneID:110069662	Cilia- and flagella-associated protein 221 (Primary ciliary dyskinesia protein 1)
comp136341_c1_seq1	ATF5	NW_018150271.1:576844-577894	187	198	-	11.8165	3.96e-05	TATGGGAGAAAT	XM_020774930.1	LOC110067584	GeneID:110067584	Protocadherin-like protein
comp136995_c0_seq1	ATF5	NW_018150256.1:747424-748474	571	582	-	13.5688	1.23e-05	AAAGGAAGAATT	XM_020774686.1	LOC110067362	GeneID:110067362	Villin-1
comp99614_c0_seq1	ATF5	NW_018149064.1:507501-508551	10	21	+	11.4862	4.83e-05	AGAGGGAGAGGT	XR_002296389.1	LOC110046465	GeneID:110046465	Dynein light chain 2, cytoplasmic (8 kDa dynein light chain b) (DLC8) (DLC8b) (Dynein light chain LC8-type 2)
comp131626_c0_seq5	ATF5	NW_018149816.1:1021939-1022989	961	972	+	11.4679	4.91e-05	CAAGGGAGAAAC	XM_020766634.1	LOC110059918	GeneID:110059918	Tubulin-specific chaperone E (Tubulin-folding cofactor E)
comp135067_c1_seq2	ATF5	NW_018150412.1:2030096-2031146	504	515	-	11.6239	4.46e-05	AAAGAAAGAAGG	XM_020745631.1	LOC110040399	GeneID:110040399	EGF-like repeat and discoidin I-like domain-containing protein 3 (Developmentally-regulated endothelial cell locus 1 protein) (Integrin-binding protein DEL1)
comp128031_c1_seq1	ATF5	NW_018149449.1:238747-239797	279	290	-	10.633	7.94e-05	AGAGGAAGAAGA	XM_020760100.1	LOC110053814	GeneID:110053814	Adenylyl cyclase-associated protein 2 (CAP 2)
comp125479_c0_seq1	ATF5	NW_018150231.1:2424647-2425697	667	678	-	13.2752	1.53e-05	AAAGGAAGAAAA	XM_020774002.1	LOC110066762	GeneID:110066762	Striatin-interacting protein 1 homolog
comp135174_c0_seq1	ATF5	NW_018149845.1:512623-513673	502	513	-	13.6697	1.14e-05	GAAGGAAGAGTG	XM_020767010.1	LOC110060255	GeneID:110060255	Rab11 family-interacting protein 3 (FIP3-Rab11) (Rab11-FIP3) (Arfophilin-1) (EF hands-containing Rab-interacting protein) (Eferin) (MU-MB-17.148)
comp124458_c0_seq1	ATF5	NW_018148843.1:521492-522542	189	200	-	12.5138	2.57e-05	AATGGAAGAAGT	XM_020748858.1	LOC110043407	GeneID:110043407	Protocadherin Fat 4 (hFat4) (Cadherin family member 14) (FAT tumor suppressor homolog 4) (Fat-like cadherin protein FAT-J)
comp118182_c0_seq1	ATF5	NW_018148960.1:468128-469178	317	328	+	11.2661	5.5e-05	AGAGGGAGAAGT	XM_020750784.1	LOC110045185	GeneID:110045185	Dynein heavy chain 6, axonemal (Axonemal beta dynein heavy chain 6) (Ciliary dynein heavy chain 6)
comp117707_c1_seq1	ATF5	NW_018148563.1:503894-504944	884	895	-	13.0092	1.81e-05	CAAGGAAGAGTG	XM_020752539.1	LOC110046822	GeneID:110046822	5-hydroxytryptamine receptor 7 (5-HT-7) (5-HT7) (5-HT-X) (Serotonin receptor 7)
comp128086_c0_seq1	ATF5	NW_018150087.1:640254-641304	232	243	+	12.9541	1.88e-05	TATGGGAGAAGA	XM_020771005.1	LOC110064000	GeneID:110064000	RYamide receptor (Neuropeptide Y-like receptor) (NPY-R)
comp131982_c0_seq1	ATF5	NW_018148700.1:80565-81615	45	56	-	12.3211	2.9e-05	GAAGGAAGACAG	XM_020745913.1	LOC110040643	GeneID:110040643	14-3-3 protein zeta
comp132487_c0_seq1	ATF5	NW_018149341.1:401811-402861	306	317	-	11.6055	4.49e-05	TAAGGAACAGGA	XM_020757446.1	LOC110051414	GeneID:110051414	COP9 signalosome complex subunit 7a (SGN7a) (Signalosome subunit 7a) (JAB1-containing signalosome subunit 7a)
comp125687_c0_seq1	ATF5	NW_018150223.1:1531871-1532921	639	650	-	10.3486	9.2e-05	TAATGAAGAAAA	XM_020773660.1	LOC110066432	GeneID:110066432	Ras-like protein RAS2
comp117433_c0_seq1	ATF5	NW_018150252.1:1038094-1039144	504	515	+	10.6972	7.67e-05	Acaggaagagga	XM_020774454.1	LOC110067159	GeneID:110067159	COP9 signalosome complex subunit 8 (Signalosome subunit 8)
comp129023_c0_seq1	ATF5	NW_018150297.1:897385-898435	995	1006	-	14.4862	6.31e-06	AAAGGAAGAATG	XM_020775971.1	LOC110068575	GeneID:110068575	Ras-like GTP-binding protein RHO
comp105377_c0_seq1	ATF5	NW_018148700.1:84504-85554	64	75	-	13.6789	1.14e-05	CAAGGAAGAGGA	XM_020745914.1	LOC110040644	GeneID:110040644	14-3-3 protein eta
comp114512_c0_seq2	ATF5	NW_018149177.1:198580-199630	207	218	+	10.7339	7.5e-05	TAAGGGGGAAAT	XM_020753993.1	LOC110048209	GeneID:110048209	Gamma-secretase subunit PEN-2 (Presenilin enhancer protein 2 homolog)
comp123497_c0_seq1	ATF5	NW_018149478.1:47515-48565	357	368	-	10.2385	9.79e-05	TAATGGAGAAAA	XM_020760837.1	LOC110054510	GeneID:110054510	E3 ubiquitin-protein ligase rnf213-alpha (EC 2.3.2.27) (EC 3.6.4.-) (Mysterin-A) (Mysterin-alpha) (RING finger protein 213-A) (RING finger protein 213-alpha) (RING-type E3 ubiquitin transferase rnf213-alpha)
comp119033_c0_seq1	ATF5	NW_018149689.1:472712-473762	410	421	-	10.211	9.91e-05	GAAGGAAGACTC	XM_020764136.1	LOC110057541	GeneID:110057541	Secreted frizzled-related protein 3 (sFRP-3) (Frizzled-related protein 1) (FrzB-1)
comp134152_c0_seq1	ATF5	NW_018148848.1:1001770-1002820	813	824	+	10.3394	9.25e-05	GGAGGAAGAagt	XM_020749095.1	LOC110043616	GeneID:110043616	Tetraspanin-5 (Tspan-5) (Tetraspan NET-4) (Transmembrane 4 superfamily member 9)
comp127875_c0_seq1	ATF5	NW_018149744.1:58937-59987	988	999	-	11.4495	4.94e-05	TAATGGAGAATG	XM_020765535.1	LOC110058873	GeneID:110058873	DCN1-like protein 3 (DCUN1 domain-containing protein 3) (Defective in cullin neddylation protein 1-like protein 3) (Squamous cell carcinoma-related oncogene 3)
comp32301_c0_seq1	ATF5	NW_018150297.1:2768370-2769420	143	154	+	10.8073	7.2e-05	TAAGAAAGAGTG	XM_020776034.1	LOC110068627	GeneID:110068627	Extracellular calcium-sensing receptor (CaSR) (Parathyroid cell calcium-sensing receptor) (PCaR1) (RaKCaR)
comp129150_c0_seq1	ATF5	NW_018149960.1:358871-359921	269	280	-	11.0917	6.11e-05	TAATGAAGAAAT	XM_020768905.1	LOC110062030	GeneID:110062030	Testican-2 (SPARC/osteonectin, CWCV, and Kazal-like domains proteoglycan 2)
comp124214_c0_seq6	ATF5	NW_018149341.1:285063-286113	862	873	+	11.6606	4.38e-05	AATGGGAGAAGA	XM_020757431.1	LOC110051393	GeneID:110051393	Calmodulin (CaM)
comp136145_c0_seq1	ATF5	NW_018149727.1:146243-147293	799	810	-	10.4679	8.66e-05	TAAGGAACAGAT	XM_020765240.1	LOC110058587	GeneID:110058587	COMM domain-containing protein 3
comp135057_c3_seq1	ATF5	NW_018150106.1:235379-236429	163	174	+	11.4037	5.05e-05	gAAGGAAGACAT	XM_020771493.1	LOC110064435	GeneID:110064435	Oncoprotein-induced transcript 3 protein (Liver-specific zona pellucida domain-containing protein)
comp135057_c3_seq2	ATF5	NW_018150106.1:235379-236429	163	174	+	11.4037	5.05e-05	gAAGGAAGACAT	XM_020771493.1	LOC110064435	GeneID:110064435	Oncoprotein-induced transcript 3 protein (Liver-specific zona pellucida domain-containing protein)
comp60684_c0_seq1	ATF5	NW_018148839.1:1390659-1391709	467	478	-	16.1193	1.68e-06	TAAGGGAGAAAG	XM_020748647.1	LOC110043209	GeneID:110043209	Calmodulin, striated muscle
comp127645_c0_seq1	ATF5	NW_018150352.1:131407-132457	156	167	+	10.7339	7.5e-05	GATGGAAGAAGA	XM_020777018.1	LOC110069493	GeneID:110069493	Calbindin-32
comp114640_c0_seq1	ATF5	NW_018149382.1:2163773-2164823	707	718	+	12.2385	3.02e-05	gaaggaagaaac	XM_020758887.1	LOC110052727	GeneID:110052727	Translationally-controlled tumor protein homolog (TCTP)
comp134935_c0_seq1	ATF5	NW_018148548.1:622012-623062	955	966	-	10.3486	9.2e-05	TAAGGGAAAATG	XM_020749433.1	LOC110043926	GeneID:110043926	ATP-binding cassette sub-family D member 3 (68 kDa peroxisomal membrane protein) (PMP68) (70 kDa peroxisomal membrane protein) (PMP70)
comp129625_c0_seq1	ATF5	NW_018149272.1:177245-178295	487	498	+	14.3761	6.68e-06	AAAGGGAGAATG	XM_020755488.1	LOC110049682	GeneID:110049682	Putative sodium-coupled neutral amino acid transporter 7 (Solute carrier family 38 member 7)
comp121466_c0_seq3	ATF5	NW_018149232.1:534285-535335	238	249	+	10.5872	8.12e-05	TAAGGATGAACG	XM_020754860.1	LOC110049090	GeneID:110049090	UDP-N-acetylglucosamine transferase subunit ALG14 homolog
comp105581_c0_seq1	ATF5	NW_018149225.1:352194-353244	701	712	-	10.2477	9.72e-05	GAAGGGAGATGA	XM_020754623.1	LOC110048863	GeneID:110048863	Sepiapterin reductase (SPR) (EC 1.1.1.153) (Benzil reductase ((S)-benzoin forming)) (EC 1.1.1.320)
comp130497_c0_seq1	ATF5	NW_018149641.1:884387-885437	229	240	+	11.7064	4.23e-05	aaaggatgAAAG	XM_020763071.1	LOC110056566	GeneID:110056566	N-alpha-acetyltransferase 16, NatA auxiliary subunit (NMDA receptor-regulated 1-like protein) (NARG1-like protein)
comp132796_c0_seq6	ATF5	NW_018150091.1:2013166-2014216	148	159	-	11.4404	4.97e-05	AATGGGAGAAAG	XM_020771347.1	LOC110064310	GeneID:110064310	Imidazoleglycerol-phosphate dehydratase (IGPD) (EC 4.2.1.19)
comp131307_c0_seq3	ATF5	NW_018148566.1:489083-490133	418	429	-	12.0367	3.41e-05	TAAGGTAGAAAA	XM_020753596.1	LOC110047851	GeneID:110047851	Putative sodium-coupled neutral amino acid transporter 10 (Solute carrier family 38 member 10)
comp131680_c0_seq1	ATF5	NW_018149706.1:612736-613786	38	49	-	11.4771	4.88e-05	GGAGGAAGAGGG	XM_020764388.1	LOC110057793	GeneID:110057793	Ubiquitin carboxyl-terminal hydrolase 3 (EC 3.4.19.12) (Deubiquitinating enzyme 3) (Ubiquitin thioesterase 3) (Ubiquitin-specific-processing protease 3)
comp136675_c1_seq10	ATF5	NW_018150087.1:23288-24338	786	797	+	13.4954	1.28e-05	aaagGAAGAGAC	XM_020770951.1	LOC110063956	GeneID:110063956	Sorting nexin-14
comp131502_c0_seq1	ATF5	NW_018149084.1:605989-607039	918	929	+	10.633	7.94e-05	CAAGGGAGACAT	XM_020752447.1	LOC110046744	GeneID:110046744	Fasciculation and elongation protein zeta-2 (Zygin II) (Zygin-2)
comp124136_c1_seq1	ATF5	NW_018150223.1:571297-572347	619	630	-	13.3211	1.48e-05	TCAGGGAGAAGG	XM_020773672.1	LOC110066446	GeneID:110066446	Copine-9 (Copine IX)
comp126301_c0_seq1	ATF5	NW_018149258.1:635355-636405	969	980	+	12.6789	2.27e-05	TAAGGGAAAAGG	XM_020755286.1	LOC110049492	GeneID:110049492	General receptor for phosphoinositides 1-associated scaffold protein (GRP1-associated scaffold protein)
comp123818_c0_seq1	ATF5	NW_018150345.1:759641-760691	39	50	-	11.211	5.7e-05	GCAGGGAGAGGG	XM_020776941.1	LOC110069412	GeneID:110069412	Orexin receptor type 1 (Ox-1-R) (Ox1-R) (Ox1R) (Hypocretin receptor type 1)
comp131578_c0_seq4	ATF5	NW_018149471.1:1557503-1558553	483	494	+	15.3119	3.03e-06	TAAGGAAGAAAT	XM_020760501.1	LOC110054167	GeneID:110054167	Good for full DBP5 activity protein 2
comp113039_c0_seq1	ATF5	NW_018149007.1:2587255-2588305	643	654	-	14.1376	8.15e-06	TAAGGTAGAGGC	XM_020751242.1	LOC110045647	GeneID:110045647	Protein sprouty homolog 3 (Spry-3)
comp124317_c0_seq1	ATF5	NW_018149007.1:1081862-1082912	792	803	+	10.2294	9.85e-05	CAAGGATGAAGC	XM_020751410.1	LOC110045779	GeneID:110045779	Myoferlin (Fer-1-like protein 3)
comp131242_c0_seq5	ATF5	NW_018149272.1:356978-358028	6	17	-	10.8899	6.88e-05	TAAGGATGAATA	XM_020755474.1	LOC110049668	GeneID:110049668	Transient receptor potential cation channel subfamily A member 1 (dTRPA1) (Ankyrin-like with transmembrane domains protein 1) (dANKTM1)
comp132896_c1_seq1	ATF5	NW_018150412.1:1639548-1640598	177	188	+	12.7339	2.19e-05	AATGGAAGAGGT	XM_020745504.1	LOC110040287	GeneID:110040287	Piwi-like protein 1 (EC 3.1.26.-)
comp137120_c0_seq1	ATF5	NW_018150325.1:2390754-2391804	596	607	+	11.4771	4.88e-05	tatggAAGAATT	XM_020776448.1	LOC110069019	GeneID:110069019	Peroxisome assembly protein 12 (Peroxin-12) (Peroxisome assembly factor 3) (PAF-3)
comp134498_c0_seq1	ATF5	NW_018149108.1:117289-118339	311	322	-	11.2569	5.56e-05	AAAGGATGAATG	XM_020752932.1	LOC110047186	GeneID:110047186	Mucin-like protein (Fragment)
comp133980_c2_seq1	ATF5	NW_018149307.1:26258-27308	309	320	+	14.5963	5.88e-06	AAAGGGAGAGTG	XM_020756071.1	LOC110050181	GeneID:110050181	U-actitoxin-Avd3h (U-AITX-Avd3h) (AsKC5)
comp125601_c0_seq1	ATF5	NW_018148940.1:275762-276812	262	273	-	12.8899	1.97e-05	TGAGGAAGAGGT	XM_020750057.1	LOC110044505	GeneID:110044505	Myotrophin
comp132815_c0_seq1	ATF5	NW_018149255.1:996-2046	984	995	-	12.2936	2.92e-05	AGAGGAAGAAGG	XM_020755167.1	LOC110049375	GeneID:110049375	Alkaline phosphatase, tissue-nonspecific isozyme (AP-TNAP) (TNSALP) (EC 3.1.3.1) (Alkaline phosphatase liver/bone/kidney isozyme)
comp134173_c0_seq4	ATF5	NW_018148547.1:3660-4710	575	586	+	10.4679	8.66e-05	AAAGGACGAAAG	XM_020748724.1	LOC110043280	GeneID:110043280	Target of Myb protein 1
comp122958_c0_seq2	ATF5	NW_018149776.1:106542-107592	522	533	-	12.5963	2.4e-05	AAATGAAGAAGG	XM_020766312.1	LOC110059586	GeneID:110059586	Monocarboxylate transporter 8 (MCT 8) (Solute carrier family 16 member 2)
comp103767_c0_seq1	ATF5	NW_018150206.1:299760-300810	10	21	-	11.4037	5.05e-05	GAAGGAAGACAT	XM_020773189.1	LOC110066002	GeneID:110066002	PCNA-associated factor (HCV NS5A-transactivated protein 9 homolog) (PCNA-associated factor of 15 kDa) (PAF15) (p15PAF) (PCNA-clamp-associated factor)
comp128427_c0_seq1	ATF5	NW_018149382.1:846232-847282	17	28	-	11.3119	5.38e-05	TAAGGACGAATG	XM_020759049.1	LOC110052856	GeneID:110052856	Zinc finger CCCH domain-containing protein 10
comp131978_c0_seq1	ATF5	NW_018150412.1:484409-485459	1	12	-	11.6789	4.3e-05	AAATGAAGAAGT	XM_020745574.1	LOC110040353	GeneID:110040353	NTF2-related export protein 1
comp133870_c0_seq1	ATF5	NW_018149006.1:214162-215212	291	302	+	18.1101	1.71e-07	TAAGGAAGAAGG	XM_020751210.1	LOC110045612	GeneID:110045612	MAM and LDL-receptor class A domain-containing protein 1 (Skeletal organic matrix MAM and LDL-receptor 1) (SOM MAM and LDL-receptor 1) (Fragment)
comp66147_c0_seq1	ATF5	NW_018149006.1:156521-157571	321	332	+	11.0183	6.35e-05	TAAGGGAAAAGA	XM_020751199.1	LOC110045601	GeneID:110045601	CUB and peptidase domain-containing protein 1 (Fragment)
comp129598_c0_seq1	ATF5	NW_018149691.1:168579-169629	530	541	+	11.0734	6.14e-05	TATGGCAGAGGG	XM_020764198.1	LOC110057603	GeneID:110057603	Cubilin (Intrinsic factor-cobalamin receptor)
comp134538_c0_seq1	ATF5	NW_018148767.1:751942-752992	709	720	-	10.9908	6.46e-05	TTTGGGAGAGGG	XM_020746760.1	LOC110041476	GeneID:110041476	Omega-amidase NIT2 (EC 3.5.1.3) (Nitrilase homolog 2)
comp100547_c0_seq1	ATF5	NW_018148842.1:617544-618594	839	850	-	13.5688	1.23e-05	AAAGGAAGAATT	XM_020748765.1	LOC110043320	GeneID:110043320	COUP transcription factor 2 (COUP-TF2) (COUP transcription factor II) (COUP-TF II) (Nuclear receptor subfamily 2 group F member 2)
comp102318_c0_seq1	ATF5	NW_018150220.1:154709-155759	124	135	+	11.3578	5.22e-05	CAAGGAAGATGG	XM_020773573.1	LOC110066348	GeneID:110066348	Dynactin subunit 3
comp136595_c0_seq1	ATF5	NW_018150360.1:742061-743111	483	494	-	10.5963	8.08e-05	AAAGAGAGAAGT	XM_020777128.1	LOC110069605	GeneID:110069605	UV-stimulated scaffold protein A
comp136096_c0_seq1	ATF5	NW_018150064.1:1549562-1550612	129	140	+	14.8349	4.83e-06	TATGGgagaggg	XM_020770466.1	LOC110063479	GeneID:110063479	Serine/threonine-protein phosphatase 4 regulatory subunit 4
comp126462_c0_seq1	ATF5	NW_018148688.1:1095960-1097010	454	465	+	10.4037	8.9e-05	AATGGAAGAGTT	XM_020775625.1	LOC110068241	GeneID:110068241	3'-5' ssDNA/RNA exonuclease TatD (EC 3.1.11.-) (EC 3.1.13.-) (DNase TatD)
comp128238_c0_seq2	ATF5	NW_018148900.1:306332-307382	396	407	+	13.2385	1.57e-05	CAAGGAAGAAAG	XM_020749828.1	LOC110044293	GeneID:110044293	Large subunit GTPase 1 homolog (EC 3.6.1.-)
comp120567_c0_seq1	ATF5	NW_018148587.1:337208-338258	99	110	-	11.5321	4.72e-05	GAAGGACGAGGG	XM_020757165.1	LOC110051158	GeneID:110051158	Putative ammonium transporter 1
comp132987_c0_seq1	ATF5	NW_018150166.1:398836-399886	773	784	+	14.2385	7.45e-06	AAAGGAAGAGAT	XM_020772608.1	LOC110065464	GeneID:110065464	DNA damage-binding protein 1 (Damage-specific DNA-binding protein 1)
comp129734_c1_seq1	ATF5	NW_018149706.1:298880-299930	987	998	+	10.2661	9.59e-05	TGAGGAAGAGAA	XM_020764353.1	LOC110057768	GeneID:110057768	TLC domain-containing protein 2
comp135032_c0_seq1	ATF5	NW_018149471.1:1056987-1058037	992	1003	+	10.9358	6.66e-05	aaatgaaGAAGC	XM_020760552.1	LOC110054197	GeneID:110054197	PIH1 domain-containing protein 2
comp51268_c0_seq1	ATF5	NW_018148829.1:1596204-1597254	929	940	-	10.2477	9.72e-05	GAAGGCAGAAGA	XM_020748236.1	LOC110042854	GeneID:110042854	Protein CASC1 (Cancer susceptibility candidate gene 1 protein homolog)
comp110212_c0_seq1	ATF5	NW_018149896.1:558723-559773	833	844	-	11.8257	3.91e-05	GTAGGGAGAAGG	XM_020767932.1	LOC110061103	GeneID:110061103	UPF0184 protein C9orf16 homolog
comp136010_c0_seq8	ATF5	NW_018148594.1:445694-446744	418	429	+	11.578	4.6e-05	caaggaagaaac	XR_002296973.1	LOC110051717	GeneID:110051717	Putative uncharacterized transposon-derived protein F52C9.6
comp135991_c2_seq1	ATF5	NW_018148688.1:309257-310307	1012	1023	+	11.945	3.62e-05	ATAGGGAGAAGT	XM_020775241.1	LOC110067893	GeneID:110067893	Transmembrane protein 192
comp126316_c0_seq2	ATF5	NW_018149283.1:784242-785292	721	732	+	12.844	2.03e-05	AAAGGTAGAGGA	XM_020755799.1	LOC110049947	GeneID:110049947	Ankyrin and armadillo repeat-containing protein
comp131003_c0_seq1	ATF5	NW_018150216.1:65172-66222	308	319	+	10.633	7.94e-05	AGAGGAAGAAGC	XM_020773484.1	LOC110066273	GeneID:110066273	Bleomycin hydrolase (BH) (BLM hydrolase) (BMH) (EC 3.4.22.40) (Aminopeptidase H)
comp136987_c1_seq6	ATF5	NW_018149908.1:993648-994698	174	185	+	13.2202	1.59e-05	TAAGGATGAAGC	XM_020768349.1	LOC110061516	GeneID:110061516	Genetic suppressor element 1
comp134324_c0_seq1	ATF5	NW_018148700.1:1348521-1349571	50	61	+	10.8807	6.89e-05	TAATGATGAGGG	XM_020745842.1	LOC110040589	GeneID:110040589	Pleckstrin homology-like domain family B member 1 (Protein LL5-alpha) (Fragment)
