# Supplementary material for: Uncovering a mitochondrial unfolded protein response in corals and its role in adapting to a changing world
Source: Proc Biol Sci. 2019 Jun 26;286(1905):20190470. doi: 10.1098/rspb.2019.0470 (PMC6599992; doi:10.1098/rspb.2019.0470)
Supplement: O. faveolata UPRmt genes identified through WGCNA [file rspb20190470supp3.xlsx]

## Sheet: Sheet1
Protein	Gene significanace correlated to Of-ATF5	Gene significanace vs. Of-ATF5 p-value	Module Membership score	Module Membership p-value	Uniprot Accession	Gene-Name	Comp	E-value
ATF5	1	0	0.944915	0.000400799	Q9Y2D1	ATF5	comp132229_c0_seq1	6e-16
Mitochondrial Proteostasis
Iron-sulfur cluster assembly 1 homolog, mitochondrial (HESB-like domain-containing protein 2) (Iron-sulfur assembly protein IscA)	0.986679	5.85e-06	0.89013	0.00304851	Q5ZJ74	ISCA1 HBLD2 RCJMB04_20e4	comp133562_c0_seq1	9e-54
Glutamate--cysteine ligase regulatory subunit (GCS light chain) (Gamma-ECS regulatory subunit) (Gamma-glutamylcysteine synthetase regulatory subunit) (Glutamate--cysteine ligase modifier subunit)	0.878662	0.00406955	0.797866	0.0176435	P48508	Gclm Glclr	comp135903_c0_seq1	7e-57
Mitochondrial inner membrane protease subunit 2 (EC 3.4.21.-) (IMP2-like protein)	0.872625	0.00468551	0.901419	0.00222152	Q2KI92	IMMP2L	comp125813_c1_seq2	3e-49
Mitochondrial proton/calcium exchanger protein (Leucine zipper-EF-hand-containing transmembrane protein 1)	0.79823	0.0175536	0.908213	0.00180258	Q9Z2I0	Letm1	comp102016_c0_seq1	1e-32
Stress-70 protein, mitochondrial (75 kDa glucose-regulated protein) (GRP-75) (Heat shock 70 kDa protein 9)	0.776642	0.0233996	0.886124	0.00338367	Q3ZCH0	HSPA9	comp135899_c0_seq2	0
Ubiquinone biosynthesis monooxygenase COQ6, mitochondrial (EC 1.14.13.-) (Coenzyme Q10 monooxygenase 6)	0.762461	0.0278217	0.623276	0.0987426	F1RAX8	coq6	comp131901_c0_seq1	3e-162
AFG1-like ATPase (EC 3.6.-.-) (Lactation elevated protein 1)	0.725505	0.0416458	0.730839	0.0394388	Q3V384	Afg1l Lace1	comp133279_c1_seq1	3e-30
AFG3-like protein 2 (EC 3.4.24.-) (Paraplegin-like protein)	0.641565	0.086395	0.739707	0.0359297	Q9Y4W6	AFG3L2	comp130491_c0_seq1	0
UDP-N-acetylglucosamine--peptide N-acetylglucosaminyltransferase 110 kDa subunit (EC 2.4.1.255) (O-GlcNAc transferase subunit p110) (O-linked N-acetylglucosamine transferase 110 kDa subunit)	0.527641	0.178959	0.643727	0.0849985	O15294	OGT	comp135101_c0_seq1	0
Cysteine desulfurase, mitochondrial (EC 2.8.1.7)	0.385147	0.346086	0.385394	0.34575	Q5RDE7	NFS1	comp130330_c0_seq1	0
Cysteine protease ATG4D (EC 3.4.22.-) (AUT-like 4 cysteine endopeptidase) (Autophagin-4) (Autophagy-related cysteine endopeptidase 4) (Autophagy-related protein 4 homolog D) [Cleaved into: Cysteine protease ATG4D, mitochondrial]	-0.563826	0.145509	-0.652083	0.0797237	Q86TL0	ATG4D APG4D AUTL4	comp108544_c0_seq1	2e-56
Mitochondrial chaperone BCS1 (BCS1-like protein)	-0.660573	0.0745657	-0.79306	0.0188588	Q7ZV60	bcs1l zgc:56205	comp117345_c0_seq3	2e-87
Adrenodoxin-like protein, mitochondrial	-0.689296	0.058598	-0.748875	0.0325097	P37193	Fdxh CG4205	comp111055_c0_seq1	2e-74
E3 ubiquitin-protein ligase HUWE1 (EC 2.3.2.26) (ARF-binding protein 1) (ARF-BP1) (HECT, UBA and WWE domain-containing protein 1) (HECT-type E3 ubiquitin transferase HUWE1) (Homologous to E6AP carboxyl terminus homologous protein 9) (HectH9) (Large structure of UREB1) (LASU1) (Mcl-1 ubiquitin ligase E3) (Mule) (Upstream regulatory element-binding protein 1) (URE-B1) (URE-binding protein 1)	-0.696288	0.0550527	-0.76514	0.0269501	Q7Z6Z7	HUWE1 KIAA0312 KIAA1578 UREB1 HSPC272	comp126535_c0_seq1	0
Protein SCO1 homolog, mitochondrial	-0.708424	0.0492101	-0.842885	0.00858942	A1A4J8	SCO1 SCOD1	comp136203_c0_seq1	1e-69
Protein SCO1 homolog, mitochondrial	-0.708424	0.0492101	-0.842885	0.00858942	A1A4J8	SCO1 SCOD1	comp136203_c0_seq1	1e-69
Thiosulfate sulfurtransferase (EC 2.8.1.1) (Rhodanese)	-0.714142	0.0465929	-0.687314	0.0596271	P25324	TST	comp117303_c0_seq1	6e-53
ATP-dependent Clp protease ATP-binding subunit clpX-like, mitochondrial	-0.740405	0.0356619	-0.874279	0.00451113	Q9JHS4	Clpx	comp121467_c0_seq1	0
DnaJ homolog subfamily A member 1	-0.759583	0.0287775	-0.790303	0.019579	Q5NVI9	DNAJA1	comp125970_c0_seq1	2e-153
ATP-dependent zinc metalloprotease FTSH 4, mitochondrial (AtFTSH4) (EC 3.4.24.-)	-0.797534	0.0177259	-0.919007	0.00124887	O80983	FTSH4 At2g26140 T19L18.5	comp136221_c0_seq2	0
Heat shock protein 75 kDa, mitochondrial (HSP 75) (TNFR-associated protein 1) (Tumor necrosis factor type 1 receptor-associated protein) (TRAP-1)	-0.82187	0.0123099	-0.87601	0.00433326	Q12931	TRAP1 HSP75	comp126205_c1_seq2	0
Uncharacterized protein C3H1.02c	-0.835325	0.00983072	-0.835797	0.00975005	Q10068	SPAC3H1.02c	comp131980_c2_seq1	2e-40
Mitochondrial Metabolism
Adenylate kinase 2, mitochondrial (AK 2) (EC 2.7.4.3) (ATP-AMP transphosphorylase 2) (ATP:AMP phosphotransferase) (Adenylate monophosphate kinase) [Cleaved into: Adenylate kinase 2, mitochondrial, N-terminally processed]	0.933315	0.00070478	0.90944	0.00173291	P54819	AK2 ADK2	comp130026_c0_seq11	3e-37
Pyruvate dehydrogenase E1 component subunit beta, mitochondrial (PDHE1-B) (EC 1.2.4.1)	0.931802	0.000752956	0.94537	0.000391074	P11966	PDHB	comp128504_c0_seq1	0
Cytochrome c oxidase subunit 6A, mitochondrial (Cytochrome c oxidase polypeptide VIa)	0.906551	0.00189986	0.962938	0.000123756	O13085		comp124860_c0_seq1	8e-28
Protein PET117 homolog, mitochondrial	0.906415	0.00190797	0.903783	0.00206926	E9QJ05	pet117 si:dkeyp-20e4.6	comp135219_c1_seq1	1e-14
Electron transfer flavoprotein-ubiquinone oxidoreductase, mitochondrial (ETF-QO) (ETF-ubiquinone oxidoreductase) (EC 1.5.5.1) (Electron-transferring-flavoprotein dehydrogenase) (ETF dehydrogenase)	0.887063	0.00330307	0.9483	0.000332212	Q2KIG0	ETFDH	comp126194_c0_seq5	0
ATP synthase F(0) complex subunit B1, mitochondrial (ATP synthase peripheral stalk-membrane subunit b) (ATP synthase subunit b) (ATPase subunit b)	0.882047	0.00374825	0.812235	0.0143064	P13619	ATP5PB ATP5F ATP5F1	comp118953_c0_seq1	5e-33
Acyl-CoA dehydrogenase family member 11 (ACAD-11) (EC 1.3.99.-)	0.845322	0.00821173	0.808479	0.0151366	Q709F0	ACAD11	comp118141_c0_seq1	7e-13
NADH-ubiquinone oxidoreductase chain 5 (EC 1.6.5.3) (NADH dehydrogenase subunit 5)	0.8399	0.00906672	0.833157	0.0102064	Q37372	ND5 NAD5	comp122036_c0_seq1	3e-55
NAD(P) transhydrogenase, mitochondrial (EC 1.6.1.2) (Nicotinamide nucleotide transhydrogenase) (Pyridine nucleotide transhydrogenase)	0.823373	0.0120152	0.842594	0.00863521	P11024	NNT	comp123419_c0_seq1	0
Mitochondrial pyruvate carrier 1 (Brain protein 44-like protein)	0.810371	0.0147148	0.835961	0.00972212	Q9Y5U8	MPC1 BRP44L CGI-129 HSPC040 PNAS-115	comp132787_c0_seq1	1e-44
Pyruvate dehydrogenase E1 component subunit alpha, somatic form, mitochondrial (EC 1.2.4.1) (PDHE1-A type I)	0.791546	0.0192521	0.711903	0.0476075	A7MB35	PDHA1	comp125232_c0_seq1	6e-161
Ubiquinol-cytochrome-c reductase complex assembly factor 1 (Basic FGF-repressed Zic-binding protein homolog) (Ubiquinol-cytochrome c reductase complex chaperone CBP3 homolog) (Zic3-binding protein)	0.752733	0.0311327	0.895546	0.00263059	Q9W6I0	uqcc1 bfzb uqcc	comp133848_c0_seq1	6e-50
2',5'-phosphodiesterase 12 (2'-PDE) (2-PDE) (EC 3.1.4.-) (Mitochondrial deadenylase) (EC 3.1.13.4)	0.731094	0.0393351	0.692395	0.0570102	Q08DF7	PDE12	comp126388_c1_seq1	4e-30
Serine--pyruvate aminotransferase, mitochondrial (SPT) (EC 2.6.1.51) (Alanine--glyoxylate aminotransferase) (AGT) (EC 2.6.1.44)	0.728707	0.0403122	0.731413	0.0392054	P31029	AGXT AGT1	comp130681_c6_seq1	5e-120
Trifunctional enzyme subunit beta, mitochondrial (TP-beta) [Includes: 3-ketoacyl-CoA thiolase (EC 2.3.1.16) (Acetyl-CoA acyltransferase) (Beta-ketothiolase)]	0.679743	0.0636568	0.628702	0.0949801	O46629	HADHB	comp124193_c0_seq1	0
GTP:AMP phosphotransferase AK3, mitochondrial (EC 2.7.4.10) (Adenylate kinase 3) (AK 3) (Adenylate kinase 3 alpha-like 1)	0.667967	0.0702376	0.79021	0.0196035	Q9UIJ7	AK3 AK3L1 AK6 AKL3L	comp126059_c0_seq1	6e-85
Very long-chain specific acyl-CoA dehydrogenase, mitochondrial (EC 1.3.8.9) (MVLCAD) (VLCAD)	0.644414	0.0845576	0.759036	0.0289614	P50544	Acadvl Vlcad	comp121211_c0_seq1	0
Acyl-coenzyme A thioesterase THEM4 (Acyl-CoA thioesterase THEM4) (EC 3.1.2.2) (Thioesterase superfamily member 4)	0.639587	0.0876847	0.782416	0.0217329	Q6GLK2	them4	comp135074_c0_seq1	2e-22
NADH dehydrogenase [ubiquinone] 1 alpha subcomplex subunit 5 (Complex I subunit B13) (Complex I-13kD-B) (CI-13kD-B) (NADH-ubiquinone oxidoreductase 13 kDa-B subunit)	0.509912	0.196716	0.667028	0.0707786	P23935	NDUFA5	comp121549_c0_seq2	5e-38
Carnitine O-palmitoyltransferase 1, liver isoform (CPT1-L) (EC 2.3.1.21) (Carnitine O-palmitoyltransferase I, liver isoform) (CPT I) (CPTI-L) (Carnitine palmitoyltransferase 1A)	-0.538665	0.16837	-0.689744	0.058367	P50416	CPT1A CPT1	comp127812_c2_seq1	2e-93
[Pyruvate dehydrogenase (acetyl-transferring)] kinase isozyme 3, mitochondrial (EC 2.7.11.2) (Pyruvate dehydrogenase kinase isoform 3)	-0.575168	0.1358	-0.738188	0.0365168	Q922H2	Pdk3	comp133072_c0_seq1	1e-129
NADH dehydrogenase [ubiquinone] iron-sulfur protein 6, mitochondrial (Complex I-13kD-A) (CI-13kD-A) (NADH-ubiquinone oxidoreductase 13 kDa-A subunit)	-0.619865	0.101151	-0.628918	0.0948318	Q4R5X8	NDUFS6 QtsA-19927	comp117928_c0_seq1	1e-32
Isocitrate lyase (ICL) (EC 4.1.3.1) (Isocitrase) (Isocitratase)	-0.62175	0.0998162	-0.648038	0.0822524	Q9K9H0	aceA BH2677	comp130059_c0_seq1	0
Alanine--glyoxylate aminotransferase 2, mitochondrial (AGT 2) (EC 2.6.1.44) ((R)-3-amino-2-methylpropionate--pyruvate transaminase) (EC 2.6.1.40) (Beta-ALAAT II) (Beta-alanine-pyruvate aminotransferase) (D-AIBAT)	-0.658675	0.0757012	-0.818535	0.0129795	Q9BYV1	AGXT2 AGT2	comp119888_c0_seq1	0
Citrate synthase, mitochondrial (EC 2.3.3.1) (Citrate (Si)-synthase)	-0.690832	0.0578079	-0.690333	0.0580641	Q7ZVY5	cs zgc:55507	comp132095_c0_seq1	0
Carnitine O-acetyltransferase (Carnitine acetylase) (EC 2.3.1.7) (Carnitine acetyltransferase) (CAT) (CrAT)	-0.697283	0.0545585	-0.828058	0.0111258	P52826	CRAT	comp133303_c0_seq10	0
Enoyl-CoA delta isomerase 1, mitochondrial (EC 5.3.3.8) (3,2-trans-enoyl-CoA isomerase) (Delta(3),Delta(2)-enoyl-CoA isomerase) (D3,D2-enoyl-CoA isomerase) (Dodecenoyl-CoA isomerase)	-0.699934	0.0532558	-0.76151	0.0281352	P23965	Eci1 Dci	comp117645_c0_seq1	1e-66
Isocitrate lyase (ICL) (EC 4.1.3.1) (Isocitrase) (Isocitratase)	-0.708437	0.0492039	-0.685361	0.0606519	Q9K9H0	aceA BH2677	comp132310_c0_seq2	1e-153
NADH dehydrogenase [ubiquinone] 1 beta subcomplex subunit 8, mitochondrial (Complex I-ASHI) (CI-ASHI) (NADH-ubiquinone oxidoreductase ASHI subunit)	-0.711641	0.0477272	-0.836036	0.0097093	Q02372	NDUFB8	comp121106_c0_seq1	1e-11
ADP-ribose pyrophosphatase, mitochondrial (EC 3.6.1.13) (ADP-ribose diphosphatase) (ADP-ribose phosphohydrolase) (Adenosine diphosphoribose pyrophosphatase) (ADPR-PPase) (Nucleoside diphosphate-linked moiety X motif 9) (Nudix motif 9)	-0.744013	0.0342975	-0.609455	0.108708	Q5XIG0	Nudt9	comp131550_c0_seq1	5e-61
Serine-arginine protein 55 (SRP55) (52 kDa bracketing protein) (B52 protein) (Protein enhancer of deformed)	-0.789123	0.0198923	-0.909377	0.00173644	P26686	B52 E(Dfd) RS55 SR55 CG10851	comp124026_c0_seq1	5e-14
Succinate--CoA ligase [ADP/GDP-forming] subunit alpha, mitochondrial (EC 6.2.1.4) (EC 6.2.1.5) (Succinyl-CoA synthetase subunit alpha) (SCS-alpha) (Fragment)	-0.858527	0.00634893	-0.820711	0.0125401	Q9YGD2	SUCLG1	comp111019_c0_seq1	6e-127
Glycine cleavage system H protein, mitochondrial (Lipoic acid-containing protein)	-0.892386	0.00286956	-0.918447	0.00127442	Q91WK5	Gcsh	comp131369_c0_seq1	3e-40
Adrenodoxin, mitochondrial (Adrenal ferredoxin) (Fragment)	-0.913994	0.00148965	-0.866808	0.00533277	P13216	FDX1	comp134921_c0_seq1	3e-35
Trifunctional enzyme subunit alpha, mitochondrial (78 kDa gastrin-binding protein) (TP-alpha) [Includes: Long-chain enoyl-CoA hydratase (EC 4.2.1.17); Long chain 3-hydroxyacyl-CoA dehydrogenase (EC 1.1.1.211)]	-0.920016	0.00120371	-0.823324	0.0120248	Q29554	HADHA LCHYD-HAD	comp129269_c0_seq1	0
Mitochondrial import
Mitochondrial import inner membrane translocase subunit TIM44	0.96426	0.000111093	0.931441	0.000764755	O35857	Timm44 Mimt44 Tim44	comp133718_c0_seq2	3e-88
Tricarboxylate transport protein, mitochondrial (Citrate transport protein) (CTP) (Solute carrier family 25 member 1) (Tricarboxylate carrier protein)	0.955358	0.000215034	0.910447	0.00167706	P79110	SLC25A1 SLC20A3	comp132186_c0_seq2	2e-120
Calcium-binding mitochondrial carrier protein Aralar2 (Citrin) (Mitochondrial aspartate glutamate carrier 2) (Solute carrier family 25 member 13)	0.889335	0.00311325	0.977742	2.71e-05	Q9UJS0	SLC25A13 ARALAR2	comp132164_c0_seq1	2e-140
Mitochondrial import inner membrane translocase subunit tim16-A (Presequence translocated-associated motor subunit pam16-A)	0.866333	0.00538801	0.932568	0.000728311	Q6NTU3	pam16-a tim16-a timm16-a	comp128826_c0_seq2	7e-41
Solute carrier family 25 member 36-A	0.773614	0.0243042	0.800756	0.016937	Q6DG32	slc25a36a si:dkeyp-90g12.1 zgc:92447	comp132536_c0_seq1	4e-86
Mitochondrial import inner membrane translocase subunit tim23	0.744653	0.0340586	0.819893	0.0127042	Q9USM7	tim23 SPCC16A11.09c	comp130209_c0_seq1	8e-24
Translocator protein (Mitochondrial benzodiazepine receptor) (PKBS) (Peripheral-type benzodiazepine receptor) (PBR)	0.708442	0.0492017	0.679134	0.0639881	P50637	Tspo Bzrp Mbr	comp134428_c0_seq1	4e-37
Thiosulfate sulfurtransferase (EC 2.8.1.1) (Rhodanese)	0.649818	0.081134	0.597466	0.117795	P24329	Tst	comp135431_c0_seq1	8e-11
Mitochondrial import inner membrane translocase subunit Tim10	0.299148	0.471663	0.411453	0.311174	P62073	Timm10 Tim10	comp123896_c0_seq4	1e-32
Ketimine reductase mu-crystallin (EC 1.5.1.25) (CDK108) (NADP-regulated thyroid-hormone-binding protein)	-0.63077	0.0935678	-0.698473	0.0539717	Q9QYU4	Crym	comp135822_c0_seq1	2e-94
Mitochondrial import receptor subunit TOM20 homolog (Mitochondrial 20 kDa outer membrane protein) (Outer mitochondrial membrane receptor Tom20)	-0.919567	0.00122367	-0.921016	0.00116001	Q6DFM9	tomm20 TNeu065b24.1	comp129613_c0_seq1	2e-33
Mitochondrial (Other)
Mitochondrial uncoupling protein 4 (UCP 4) (Solute carrier family 25 member 27)	0.897181	0.00251217	0.929092	0.000844576	O95847	SLC25A27 UCP4 UNQ772/PRO1566	comp132047_c0_seq1	2e-38
Kinesin-1 heavy chain (Conventional kinesin heavy chain) (Ubiquitous kinesin heavy chain) (UKHC)	0.891646	0.00292752	0.904352	0.00203366	P33176	KIF5B KNS KNS1	comp136834_c0_seq1	5e-13
MICOS complex subunit Mic19 (Coiled-coil-helix-coiled-coil-helix domain-containing protein 3)	0.869516	0.0050247	0.899708	0.00233607	Q9CRB9	Chchd3 Mic19	comp132736_c0_seq1	3e-13
Apoptosis-inducing factor 2 (EC 1.-.-.-)	0.862827	0.00580717	0.813811	0.0139668	B5FXE5	AIFM2	comp114463_c0_seq1	3e-73
Mitochondrial uncoupling protein 3 (UCP 3) (Solute carrier family 25 member 9)	0.823306	0.0120283	0.823906	0.0119119	O77792	UCP3 SLC25A9	comp131250_c0_seq5	2e-100
Protein TAR1 (Transcript antisense to ribosomal RNA protein 1)	0.818753	0.0129351	0.889209	0.00312356	Q8TGM6	TAR1 ART1 YLR154W-C YLR154W-A	comp112687_c0_seq2	3e-18
39S ribosomal protein L30, mitochondrial (L30mt) (MRP-L30)	0.800995	0.0168792	0.732187	0.0388926	P0C2C1	Mrpl30	comp128471_c0_seq1	5e-14
WD repeat-containing protein 26	0.795837	0.0181505	0.674509	0.0665346	Q8C6G8	Wdr26	comp125562_c0_seq1	0
Transmembrane protein 11, mitochondrial	0.785902	0.0207636	0.747735	0.0329238	Q6NWH5	tmem11 zgc:110086	comp135699_c0_seq1	2e-65
Mitochondrial uncoupling protein 4 (UCP 4) (Solute carrier family 25 member 27)	0.758648	0.0290924	0.842947	0.0085796	O95847	SLC25A27 UCP4 UNQ772/PRO1566	comp128038_c0_seq1	7e-80
28S ribosomal protein S21, mitochondrial (MRP-S21) (S21mt) (Mitochondrial small ribosomal subunit protein bS21m)	0.678252	0.0644687	0.790379	0.0195588	P82921	MRPS21 RPMS21 MDS016	comp105471_c0_seq1	4e-19
Glyoxalase domain-containing protein 4	0.677671	0.0647873	0.621769	0.0998025	Q5I0D1	Glod4	comp130036_c0_seq1	6e-138
Serine/threonine-protein kinase PINK1, mitochondrial (EC 2.7.11.1) (BRPK) (PTEN-induced putative kinase protein 1)	0.623207	0.0987911	0.670531	0.0687722	Q99MQ3	Pink1	comp126545_c0_seq1	7e-69
AFG1-like ATPase (EC 3.6.-.-) (Lactation elevated protein 1)	0.616513	0.10355	0.817102	0.0132742	Q3V384	Afg1l Lace1	comp132486_c2_seq11	1e-14
Alternative oxidase, mitochondrial (EC 1.-.-.-)	0.479727	0.228988	0.656194	0.077201	Q8NKE2	AOX1 CNAG_00162	comp135498_c1_seq1	5e-78
Polyubiquitin-B [Cleaved into: Ubiquitin]	0.455213	0.257057	0.513371	0.193181	P0CG53	UBB	comp136491_c0_seq2	3e-80
Protein preY, mitochondrial	-0.408545	0.314947	-0.600145	0.115729	Q2T9V7	PREY	comp109501_c0_seq2	2e-17
Nuclease EXOG, mitochondrial (EC 3.1.30.-) (Endonuclease G-like 1) (Endo G-like 1)	-0.659849	0.0749976	-0.802162	0.0165996	Q502K1	exog endogl1	comp109951_c0_seq1	1e-27
28S ribosomal protein S28, mitochondrial (MRP-S28) (S28mt)	-0.769505	0.0255661	-0.764056	0.0273006	P82928	MRPS28	comp125391_c0_seq1	4e-07
Phosphofurin acidic cluster sorting protein 2 (PACS-2) (PACS1-like protein)	-0.773366	0.0243791	-0.851366	0.00732111	Q86VP3	PACS2 KIAA0602 PACS1L	comp132397_c0_seq3	9e-117
Coiled-coil-helix-coiled-coil-helix domain-containing protein 2	-0.80362	0.0162543	-0.795059	0.0183471	Q9D1L0	Chchd2	comp112418_c0_seq1	7e-29
FUN14 domain-containing protein 1A	-0.827808	0.0111722	-0.781878	0.021885	Q58EA0	fundc1-a	comp132054_c0_seq1	8e-16
Protein Homeostasis
E3 ubiquitin-protein ligase TRIM71 (EC 2.3.2.27) (Protein lin-41 homolog) (RING-type E3 ubiquitin transferase TRIM71) (Tripartite motif-containing protein 71)	0.968382	7.72e-05	0.923641	0.0010503	F6QEU4	trim71 lin41	comp135875_c0_seq1	7e-31
2-phosphoxylose phosphatase 1 (EC 3.1.3.-) (Acid phosphatase-like protein 2)	0.956607	0.000197672	0.913146	0.00153313	Q0IHQ9	pxylp1 acpl2	comp137214_c1_seq4	6e-11
Talin-1	0.954241	0.000231388	0.88409	0.00356252	Q9Y490	TLN1 KIAA1027 TLN	comp129766_c0_seq1	0
E3 ubiquitin-protein ligase UBR2 (EC 2.3.2.27) (N-recognin-2) (RING-type E3 ubiquitin transferase UBR2) (Ubiquitin-protein ligase E3-alpha-2) (Ubiquitin-protein ligase E3-alpha-II)	0.946417	0.000369317	0.95173	0.000271097	Q8IWV8	UBR2 C6orf133 KIAA0349	comp135411_c1_seq1	3e-105
Insulin-degrading enzyme (EC 3.4.24.56) (Insulin protease) (Insulinase) (Insulysin)	0.936315	0.000615284	0.939782	0.000521562	Q24K02	IDE	comp123697_c0_seq1	1e-140
Cullin-1 (CUL-1)	0.924303	0.00102374	0.841558	0.00879959	Q5R4G6	CUL1	comp94663_c0_seq1	0
Kelch-like protein diablo	0.913769	0.00150109	0.915094	0.00143444	B4GRJ2	dbo GL25213	comp111269_c0_seq1	1e-50
Ras-related GTP-binding protein A (Rag A) (RagA)	-0.841519	0.00880587	-0.744685	0.0340469	Q80X95	Rraga	comp134587_c0_seq2	8e-179
E3 ubiquitin-protein ligase TRIP12 (EC 2.3.2.26) (HECT-type E3 ubiquitin transferase TRIP12) (Thyroid receptor-interacting protein 12) (TR-interacting protein 12) (TRIP-12)	0.91106	0.00164363	0.912721	0.00155526	B4F6W9	trip12	comp24757_c0_seq1	4e-45
Alpha-1,3-mannosyl-glycoprotein 4-beta-N-acetylglucosaminyltransferase C (EC 2.4.1.145) (N-glycosyl-oligosaccharide-glycoprotein N-acetylglucosaminyltransferase IVc) (GnT-IVc) (N-acetylglucosaminyltransferase IVc) (UDP-N-acetylglucosamine: alpha-1,3-D-mannoside beta-1,4-N-acetylglucosaminyltransferase IVc)	0.909938	0.00170512	0.829402	0.0108786	Q5U3T0	mgat4c zgc:101663	comp111558_c0_seq1	2e-21
Endoplasmic reticulum chaperone BiP (EC 3.6.4.10) (78 kDa glucose-regulated protein) (GRP-78) (Binding-immunoglobulin protein) (BiP) (Heat shock protein 70 family protein 5) (HSP70 family protein 5) (Heat shock protein family A member 5) (Immunoglobulin heavy chain-binding protein)	0.895433	0.00263892	0.833857	0.0100842	Q90593	HSPA5 GRP78	comp108794_c0_seq1	0
Ubiquitin-conjugating enzyme E2 Z (EC 2.3.2.23) (E2 ubiquitin-conjugating enzyme Z) (Ubiquitin carrier protein Z) (Ubiquitin-protein ligase Z)	0.883948	0.00357525	0.954632	0.000225572	Q6PCF7	ube2z	comp134814_c0_seq1	7e-88
Beta-alanine-activating enzyme (EC 6.2.1.-) (Acyl-CoA synthetase family member 4) (Protein NRPS998)	0.880128	0.00392837	0.813209	0.014096	Q4L235	AASDH ACSF4 U26 HSPC318	comp89228_c0_seq1	7e-33
Protein N-terminal glutamine amidohydrolase (EC 3.5.1.122) (Protein NH2-terminal glutamine deamidase) (N-terminal Gln amidase) (Nt(Q)-amidase) (WDYHV motif-containing protein 1)	0.878343	0.00410067	0.9296	0.000826863	Q5PPU8	wdyhv1 ntaq1	comp126600_c0_seq4	2e-59
Protein Hikeshi	0.868188	0.00517434	0.774229	0.0241187	A4IGP0	hikeshi	comp118899_c0_seq1	4e-77
BTB/POZ domain-containing protein 6	0.836792	0.00958145	0.917948	0.00129746	Q8K2J9	Btbd6	comp129607_c0_seq1	2e-35
Cyclic AMP-responsive element-binding protein 3-like protein 1 (cAMP-responsive element-binding protein 3-like protein 1) (Old astrocyte specifically-induced substance) (OASIS) [Cleaved into: Processed cyclic AMP-responsive element-binding protein 3-like protein 1]	0.835977	0.00971943	0.89654	0.0025582	Q66HA2	Creb3l1 Oasis	comp127408_c0_seq1	3e-43
E3 ubiquitin-protein ligase RBBP6 (EC 2.3.2.27) (Proliferation potential-related protein) (Protein P2P-R) (RING-type E3 ubiquitin transferase RBBP6) (Retinoblastoma-binding protein 6) (p53-associated cellular protein of testis)	0.822686	0.0121493	0.833823	0.01009	P97868	Rbbp6 P2pr Pact	comp121250_c0_seq1	9e-25
Transmembrane protease serine 2 (EC 3.4.21.-) (Epitheliasin) (Plasmic transmembrane protein X) [Cleaved into: Transmembrane protease serine 2 non-catalytic chain; Transmembrane protease serine 2 catalytic chain]	0.814243	0.0138746	0.857461	0.00648808	Q9JIQ8	Tmprss2	comp136269_c0_seq2	3e-45
Ubiquitin carboxyl-terminal hydrolase 24 (EC 3.4.19.12) (Deubiquitinating enzyme 24) (Ubiquitin thioesterase 24) (Ubiquitin-specific-processing protease 24)	0.813164	0.0141055	0.870366	0.00493049	Q9UPU5	USP24 KIAA1057	comp134599_c3_seq3	2e-179
Protein O-mannosyl-transferase 2 (EC 2.4.1.109) (Dolichyl-phosphate-mannose--protein mannosyltransferase 2)	0.811431	0.0144817	0.800215	0.0170677	Q9UKY4	POMT2	comp132340_c0_seq1	9e-175
Ubiquitin-like protein 7	0.801648	0.0167223	0.92882	0.000854171	Q2KIS3	UBL7	comp134624_c0_seq1	6e-07
RING finger and CHY zinc finger domain-containing protein 1 (EC 2.3.2.27) (Androgen receptor N-terminal-interacting protein) (CH-rich-interacting match with PLAG1) (E3 ubiquitin-protein ligase Pirh2) (RING finger protein 199) (RING-type E3 ubiquitin transferase RCHY1) (Zinc finger protein 363) (p53-induced RING-H2 protein) (hPirh2)	0.801386	0.0167852	0.751989	0.0313956	Q96PM5	RCHY1 ARNIP CHIMP PIRH2 RNF199 ZNF363	comp136525_c0_seq3	2e-29
Transitional endoplasmic reticulum ATPase (TER ATPase) (EC 3.6.4.6) (15S Mg(2+)-ATPase p97 subunit) (p97) (Valosin-containing protein) (VCP)	0.793123	0.0188427	0.796246	0.0180474	P23787	vcp	comp132558_c0_seq1	0
Proteasome assembly chaperone 1	0.79191	0.0191571	0.895812	0.00261111	A7RV13	psmg1 v1g202556	comp135664_c1_seq4	6e-51
Tripartite motif-containing protein 2 (EC 2.3.2.27) (E3 ubiquitin-protein ligase TRIM2) (Neural activity-related RING finger protein) (RING-type E3 ubiquitin transferase TRIM2)	0.787077	0.0204431	0.685272	0.0606986	Q9ESN6	Trim2 Kiaa0517 Narf	comp128415_c1_seq3	8e-28
Serine/threonine-protein kinase WNK3 (EC 2.7.11.1) (Protein kinase lysine-deficient 3) (Protein kinase with no lysine 3)	0.701688	0.0524044	0.797407	0.0177574	Q9BYP7	WNK3 KIAA1566 PRKWNK3	comp123515_c0_seq1	3e-06
Probable E3 ubiquitin-protein ligase makorin-1 (EC 2.3.2.27) (RING-type E3 ubiquitin transferase makorin-1)	0.786926	0.0204841	0.647081	0.0828576	Q4VBT5	mkrn1 si:ch211-9f20.3 zgc:110403	comp132259_c0_seq1	1e-103
Leucine-rich repeat-containing protein 49 (Tubulin polyglutamylase complex subunit 4) (PGs4) (p79)	0.778247	0.0229287	0.660183	0.0747982	Q91YK0	Lrrc49	comp126937_c0_seq2	2e-118
Probable N-acetyltransferase san (EC 2.3.1.258) (N-epsilon-acetyltransferase san) (EC 2.3.1.-) (Protein atado) (Protein separation anxiety)	0.756695	0.0297567	0.646527	0.0832092	Q9NHD5	san span CG12352	comp134660_c0_seq1	5e-88
Heat shock protein beta-1 (HspB1) (25 kDa IAP) (Actin polymerization inhibitor) (Heat shock 25 kDa protein) (HSP 25) (Heat shock 27 kDa protein) (HSP 27)	0.756518	0.0298173	0.899108	0.00237711	Q00649	HSPB1	comp127258_c0_seq1	1e-15
E3 ubiquitin-protein ligase MARCH8 (EC 2.3.2.27) (Cellular modulator of immune recognition) (c-MIR) (Membrane-associated RING finger protein 8) (Membrane-associated RING-CH protein VIII) (MARCH-VIII) (RING-type E3 ubiquitin transferase MARCH8)	0.756518	0.0298173	0.899108	0.00237711	Q9DBD2	March8 Mir	comp127835_c0_seq1	1e-15
Cyclin-dependent kinase 10 (EC 2.7.11.22) (Cell division protein kinase 10)	0.733822	0.0382363	0.861297	0.00599634	Q3UMM4	Cdk10	comp107782_c0_seq1	1e-163
E3 ubiquitin-protein ligase ARIH1 (EC 2.3.2.31) (Protein ariadne-1 homolog) (ARI-1) (RING-type E3 ubiquitin transferase ARIH1) (UbcH7-binding protein) (UbcM4-interacting protein 77) (Ubiquitin-conjugating enzyme E2-binding protein 1)	0.717923	0.0449096	0.673796	0.0669323	Q9Z1K5	Arih1 Ari Ubch7bp Uip77	comp122091_c0_seq1	0
Alpha-adducin (Erythrocyte adducin subunit alpha)	0.715813	0.0458442	0.70139	0.0525486	P35611	ADD1 ADDA	comp134429_c0_seq1	5e-68
UBX domain-containing protein 4 (UBX domain-containing protein 2)	0.703138	0.0517065	0.686314	0.0601504	Q5R4I3	UBXN4 UBXD2	comp132032_c0_seq1	6e-32
N-acetyl-beta-glucosaminyl-glycoprotein 4-beta-N-acetylgalactosaminyltransferase 1 (NGalNAc-T1) (EC 2.4.1.244) (Beta-1,4-N-acetylgalactosaminyltransferase IV) (Beta4GalNAc-T4) (Beta4GalNAcT4)	0.699137	0.0536457	0.746797	0.0332665	Q76KP1	B4GALNT4	comp136277_c4_seq2	3e-41
Kelch-like protein 28 (BTB/POZ domain-containing protein 5)	0.677428	0.0649203	0.63172	0.0929233	Q9NXS3	KLHL28 BTBD5	comp137178_c0_seq1	2e-53
Cullin-3	0.661705	0.0738935	0.671611	0.0681601	B5DF89	Cul3	comp128051_c0_seq1	0
Adenosine monophosphate-protein transferase Fic (EC 2.7.7.n1) (De-AMPylase Fic) (EC 3.1.4.-)	0.654517	0.0782245	0.766023	0.0266664	A7SVT1	v1g194069	comp132985_c0_seq3	5e-123
E3 ubiquitin-protein ligase SH3RF1 (EC 2.3.2.27) (Plenty of SH3s) (Protein POSH) (xPOSH) (RING-type E3 ubiquitin transferase SH3RF1) (SH3 domain-containing RING finger protein 1)	0.645869	0.0836273	0.758936	0.0289951	Q6NRD3	sh3rf1 posh	comp125564_c0_seq1	5e-90
Neuralized-like protein 4	0.616826	0.103325	0.68032	0.0633445	A1L0Y2	neurl4	comp120771_c0_seq1	1e-25
Protein SCO1 homolog, mitochondrial	0.692105	0.0571576	0.810887	0.014601	A1A4J8	SCO1 SCOD1	comp136203_c0_seq1	1e-69
E3 ubiquitin-protein ligase MYLIP (EC 2.3.2.27) (Inducible degrader of the LDL-receptor) (Idol) (Myosin regulatory light chain interacting protein) (MIR) (RING-type E3 ubiquitin transferase MYLIP)	0.616008	0.103914	0.815624	0.0135826	Q8WY64	MYLIP BZF1 IDOL BM-023 PP5242	comp127808_c0_seq1	2e-118
Gamma-secretase subunit PEN-2 (Presenilin enhancer protein 2 homolog)	0.615575	0.104227	0.780307	0.0223328	Q8JHF0	psenen pen2 zgc:109727	comp114512_c0_seq1	1e-31
Mannose-1-phosphate guanyltransferase beta (EC 2.7.7.13) (GDP-mannose pyrophosphorylase B) (GTP-mannose-1-phosphate guanylyltransferase beta)	0.604887	0.112121	0.618414	0.102186	Q6DBU5	gmppb zgc:92026	comp135170_c2_seq1	0
Probable E3 ubiquitin-protein ligase HERC1 (EC 2.3.2.26) (HECT domain and RCC1-like domain-containing protein 1) (HECT-type E3 ubiquitin transferase HERC1) (p532) (p619)	0.542706	0.164575	0.616879	0.103287	Q15751	HERC1	comp120207_c0_seq3	0
Kelch-like protein 8	0.484901	0.223276	0.580355	0.131483	Q9P2G9	KLHL8 KIAA1378	comp135222_c0_seq1	4e-162
AMSH-like protease (AMSH-LP) (EC 3.4.19.-) (STAM-binding protein-like 1)	0.470202	0.239699	0.616872	0.103292	Q96FJ0	STAMBPL1 AMSHLP KIAA1373	comp135953_c0_seq1	7e-91
Protein sel-1 homolog 1 (Suppressor of lin-12-like protein 1) (Sel-1L)	-0.679848	0.0636	-0.682141	0.0623638	Q9UBV2	SEL1L TSA305 UNQ128/PRO1063	comp134296_c1_seq1	0
E3 ubiquitin-protein ligase DZIP3 (EC 2.3.2.27) (DAZ-interacting protein 3) (RING-type E3 ubiquitin transferase DZIP3) (RNA-binding ubiquitin ligase of 138 kDa) (hRUL138)	0.454221	0.258227	0.568218	0.141705	Q86Y13	DZIP3 KIAA0675	comp109230_c0_seq1	2e-09
Epsin-2 (EPS-15-interacting protein 2)	0.67955	0.0637614	0.658162	0.0760098	O95208	EPN2 KIAA1065	comp137262_c1_seq1	2e-83
Thioredoxin domain-containing protein 5 (Endoplasmic reticulum resident protein 46) (ER protein 46) (ERp46) (Thioredoxin-like protein p46)	-0.363773	0.37571	-0.454165	0.258293	Q8NBS9	TXNDC5 TLP46 UNQ364/PRO700	comp133083_c0_seq2	3e-63
CDK5 regulatory subunit-associated protein 3	-0.485772	0.222321	-0.574922	0.136007	Q99LM2	Cdk5rap3	comp124606_c0_seq2	3e-135
Armadillo repeat-containing protein 8	-0.535216	0.171646	-0.634893	0.0907893	Q05AL1	armc8 zgc:153683	comp127546_c0_seq3	0
E3 SUMO-protein ligase RanBP2 (EC 2.3.2.-) (Ran-binding protein 2) (RanBP2)	-0.563826	0.145509	-0.652083	0.0797237	Q9ERU9	Ranbp2	comp131308_c0_seq1	1e-56
Endoplasmic reticulum mannosyl-oligosaccharide 1,2-alpha-mannosidase (EC 3.2.1.113) (ER alpha-1,2-mannosidase) (ER mannosidase 1) (ERMan1) (Man9GlcNAc2-specific-processing alpha-mannosidase) (Mannosidase alpha class 1B member 1)	-0.57974	0.131991	-0.676958	0.0651787	Q9UKM7	MAN1B1 UNQ747/PRO1477	comp122079_c0_seq1	3e-59
E3 ubiquitin-protein ligase HERC2 (EC 2.3.2.26) (HECT domain and RCC1-like domain-containing protein 2) (HECT-type E3 ubiquitin transferase HERC2)	-0.615994	0.103925	-0.643982	0.0848346	Q4U2R1	Herc2 Jdf2 Kiaa0393 Rjs	comp132351_c0_seq1	0
Ubiquitin carboxyl-terminal hydrolase 16 (EC 3.4.19.12) (Deubiquitinating enzyme 16) (Ubiquitin thioesterase 16) (Ubiquitin-specific-processing protease 16)	-0.626651	0.0963924	-0.831925	0.010424	Q4R6X7	USP16 QtsA-16913 QtsA-18064	comp122860_c0_seq1	2e-47
Lysosome membrane protein 2 (85 kDa lysosomal membrane sialoglycoprotein) (LGP85) (CD36 antigen-like 2) (Lysosome membrane protein II) (LIMP II) (Scavenger receptor class B member 2) (CD antigen CD36)	0.674242	0.0666832	0.686781	0.0599057	P27615	Scarb2 Cd36l2 Limpii	comp132379_c0_seq1	3e-88
Creatine kinase, testis isozyme (EC 2.7.3.2)	-0.672394	0.0677189	-0.769369	0.0256084	P24722	tck1	comp131113_c0_seq1	0
Transmembrane protease serine 11D (EC 3.4.21.-) (Airway trypsin-like protease) [Cleaved into: Transmembrane protease serine 11D non-catalytic chain; Transmembrane protease serine 11D catalytic chain]	-0.636057	0.0900139	-0.696018	0.0551872	O60235	TMPRSS11D HAT	comp132171_c0_seq5	2e-56
Proteasome subunit beta type-5 (EC 3.4.25.1) (Macropain epsilon chain) (Multicatalytic endopeptidase complex epsilon chain) (Proteasome chain 6) (Proteasome epsilon chain) (Proteasome subunit X)	-0.659188	0.0753932	-0.790263	0.0195896	P28075	Psmb5	comp113782_c0_seq1	6e-121
Peptidyl-prolyl cis-trans isomerase FKBP2 (PPIase FKBP2) (EC 5.2.1.8) (13 kDa FK506-binding protein) (13 kDa FKBP) (FKBP-13) (FK506-binding protein 2) (FKBP-2) (Immunophilin FKBP13) (Rotamase)	-0.663418	0.0728826	-0.784149	0.0212476	P45878	Fkbp2 Fkbp13	comp114470_c0_seq1	1e-61
S-phase kinase-associated protein 1 (Cyclin-A/CDK2-associated protein p19) (S-phase kinase-associated protein 1A) (p19A) (p19skp1)	-0.670713	0.0686686	-0.706675	0.0500279	Q71U00	skp1 skp1a	comp119517_c0_seq1	5e-80
Prolyl endopeptidase (PE) (EC 3.4.21.26) (Post-proline cleaving enzyme)	-0.686252	0.060183	-0.828456	0.0110522	P48147	PREP PEP	comp127493_c1_seq4	0
Alpha-(1,6)-fucosyltransferase (Alpha1-6FucT) (EC 2.4.1.68) (GDP-L-Fuc:N-acetyl-beta-D-glucosaminide alpha1,6-fucosyltransferase) (GDP-fucose--glycoprotein fucosyltransferase) (Glycoprotein 6-alpha-L-fucosyltransferase)	-0.698042	0.054184	-0.8583	0.00637842	Q6NVP8	fut8	comp133314_c0_seq1	7e-84
Exostosin-2 (EC 2.4.1.224) (EC 2.4.1.225) (Protein sister of tout-velu)	-0.738372	0.0364453	-0.800538	0.0169896	Q9Y169	Ext2 DEXT2 sotv CG33038	comp134114_c0_seq2	3e-87
Chymotrypsinogen B (EC 3.4.21.1) [Cleaved into: Chymotrypsin B chain A; Chymotrypsin B chain B; Chymotrypsin B chain C]	-0.74332	0.034557	-0.831444	0.0105097	P00767		comp137244_c0_seq1	5e-45
E3 ubiquitin-protein ligase TRIM71 (EC 2.3.2.27) (Protein lin-41 homolog) (RING-type E3 ubiquitin transferase TRIM71) (Tripartite motif-containing protein 71)	-0.762962	0.0276575	-0.630764	0.0935719	D3ZVM4	Trim71 Lin41	comp124338_c0_seq1	9e-23
DBH-like monooxygenase protein 1 (EC 1.14.17.-) (DBH-related protein) (Monooxygenase X)	0.6675	0.0705066	0.827449	0.0112389	Q9CXI3	Moxd1 Dbhr Mox	comp135671_c0_seq1	4e-14
E3 ubiquitin-protein ligase HECTD1 (EC 2.3.2.26) (E3 ligase for inhibin receptor) (EULIR) (HECT domain-containing protein 1) (HECT-type E3 ubiquitin transferase HECTD1)	-0.765382	0.0268721	-0.896121	0.00258857	Q9ULT8	HECTD1 KIAA1131	comp132703_c0_seq1	8e-161
F-box/WD repeat-containing protein sel-10 (Egg laying defective protein 41) (Suppressor/enhancer of lin-12 protein 10)	-0.771236	0.0250296	-0.841603	0.00879234	Q93794	sel-10 egl-41 F55B12.3	comp136512_c0_seq10	5e-14
Serine-arginine protein 55 (SRP55) (52 kDa bracketing protein) (B52 protein) (Protein enhancer of deformed)	-0.666305	0.0711971	-0.685421	0.0606199	P26686	B52 E(Dfd) RS55 SR55 CG10851	comp124026_c0_seq1	5e-14
Ubiquitin conjugation factor E4 A (EC 2.3.2.27) (RING-type E3 ubiquitin transferase E4 A)	-0.77135	0.0249945	-0.854884	0.00683244	Q6P7A2	Ube4a	comp133070_c0_seq1	3e-174
Ubiquitin-conjugating enzyme E2 C (EC 2.3.2.23) ((E3-independent) E2 ubiquitin-conjugating enzyme C) (EC 2.3.2.24) (E2 ubiquitin-conjugating enzyme C) (Ubiquitin carrier protein C) (Ubiquitin-protein ligase C)	-0.776052	0.0235741	-0.780001	0.0224206	Q95044	UBE2C UBCH10	comp119105_c0_seq1	4e-53
Endothelin-converting enzyme homolog (ECE) (EC 3.4.24.-)	-0.793034	0.0188655	-0.854549	0.00687812	Q8IS64		comp135537_c0_seq2	1e-122
Peptidyl-prolyl cis-trans isomerase C (PPIase C) (EC 5.2.1.8) (Cyclophilin C) (Rotamase C)	-0.825312	0.0116419	-0.743865	0.0343526	P30412	Ppic Cypc	comp96296_c0_seq1	9e-27
Ubiquitin carboxyl-terminal hydrolase 38 (EC 3.4.19.12) (Deubiquitinating enzyme 38) (HP43.8KD) (Ubiquitin thioesterase 38) (Ubiquitin-specific-processing protease 38)	-0.843636	0.00847176	-0.940491	0.000503605	Q8NB14	USP38 KIAA1891	comp121709_c0_seq3	1e-78
Dipeptidyl aminopeptidase BIII (DAP BIII) (EC 3.4.14.-)	-0.848033	0.00780419	-0.749592	0.0322513	V5YMB3	dapb3	comp121604_c0_seq1	7e-17
Protein sel-1 homolog 1 (Suppressor of lin-12-like protein 1) (Sel-1L)	-0.861449	0.00597743	-0.955217	0.000217054	Q9UBV2	SEL1L TSA305 UNQ128/PRO1063	comp134296_c1_seq1	0
Protein phosphatase 1 regulatory subunit 7 (Protein phosphatase 1 regulatory subunit 22)	-0.861572	0.00596211	-0.894159	0.00273385	Q32PL1	ppp1r7 sds22 zgc:123325	comp126796_c1_seq3	2e-16
BTB/POZ domain-containing protein 6 (Lens BTB domain protein)	-0.906228	0.00191911	-0.878994	0.00403732	Q96KE9	BTBD6 BDPL	comp134189_c1_seq2	3e-51
Beta-1,3-galactosyltransferase 1 (Beta-1,3-GalTase 1) (Beta3Gal-T1) (Beta3GalT1) (EC 2.4.1.86) (UDP-galactose:beta-N-acetyl-glucosamine-beta-1,3-galactosyltransferase 1)	-0.907638	0.00183589	-0.931672	0.000757203	Q9MYM7	B3GALT1	comp132421_c0_seq3	4e-30
WD repeat, SAM and U-box domain-containing protein 1	-0.938507	0.000554836	-0.876108	0.00432332	Q5ZMC3	WDSUB1 RCJMB04_2i21	comp126251_c0_seq35	3e-98
Sacsin (DnaJ homolog subfamily C member 29) (DNAJC29)	-0.946612	0.000365359	-0.860039	0.00615489	Q9NZJ4	SACS KIAA0730	comp131043_c0_seq1	2e-58
Elongin-B (EloB) (Elongin 18 kDa subunit) (RNA polymerase II transcription factor SIII subunit B) (SIII p18) (Transcription elongation factor B polypeptide 2)	-0.95943	0.000161902	-0.928854	0.000852939	P62870	Elob Tceb2	comp106389_c0_seq1	1e-42
NEDD8-activating enzyme E1 catalytic subunit (EC 6.2.1.-) (NEDD8-activating enzyme E1C) (Ubiquitin-activating enzyme E1C) (Ubiquitin-like modifier-activating enzyme 3) (Ubiquitin-activating enzyme 3)	-0.963479	0.000118468	-0.892278	0.00287799	Q5R4A0	UBA3 UBE1C	comp130085_c2_seq1	5e-44
Immunity
NACHT, LRR and PYD domains-containing protein 14 (NALP-iota) (Germ cell specific leucine-rich repeat NTPase)	0.991063	1.77e-06	0.921327	0.00114666	Q6B966	Nlrp14 Nalp14	comp120998_c1_seq1	3e-08
Cyclic GMP-AMP synthase (cGAMP synthase) (cGAS) (nv-cGAS) (EC 2.7.7.86) (3'3'-cGAMP synthase)	0.975981	3.4e-05	0.913612	0.00150916	A7SFB5	v1g211400	comp131530_c0_seq8	4e-36
Myeloid differentiation primary response protein MyD88	0.966613	9.07e-05	0.958603	0.0001719	B3SRQ2	myd88	comp91091_c0_seq1	1e-06
DNA-dependent protein kinase catalytic subunit (DNA-PK catalytic subunit) (DNA-PKcs) (EC 2.7.11.1) (DNPK1) (p460)	0.931826	0.000752188	0.932535	0.000729356	P78527	PRKDC HYRC HYRC1	comp97047_c0_seq1	0
Mucosa-associated lymphoid tissue lymphoma translocation protein 1 (EC 3.4.22.-) (MALT lymphoma-associated translocation) (Paracaspase)	0.926682	0.000931924	0.951998	0.000266662	Q9UDY8	MALT1 MLT	comp85051_c0_seq1	1e-05
TNF receptor-associated factor 3 (EC 2.3.2.27) (CD40 receptor-associated factor 1) (CRAF1) (RING-type E3 ubiquitin transferase TRAF3) (TRAFAMN)	0.910029	0.0017001	0.881926	0.00375947	Q60803	Traf3 Craf1 Trafamn	comp134768_c0_seq1	4e-116
Guanylate-binding protein 7 (GTP-binding protein 7) (GBP-7) (Guanine nucleotide-binding protein 7) (Guanylate-binding protein 4-like)	0.909194	0.00174674	0.9356	0.000635902	Q8N8V2	GBP7 GBP4L	comp132217_c0_seq2	5e-20
TNF receptor-associated factor 5	0.904135	0.00204718	0.899903	0.00232282	P70191	Traf5	comp126996_c0_seq1	6e-70
Techylectin-5B	0.851777	0.00726297	0.755815	0.0300589	Q9U8W7		comp132118_c1_seq3	8e-21
Deleted in malignant brain tumors 1 protein (Glycoprotein 340) (Gp-340) (Hensin) (Salivary agglutinin) (SAG) (Surfactant pulmonary-associated D-binding protein)	0.84832	0.00776179	0.905916	0.0019379	Q9UGM3	DMBT1 GP340	comp135217_c0_seq2	3e-57
Attractin (Protein zitter)	0.8414	0.00882477	0.801859	0.0166721	Q99J86	Atrn	comp133387_c0_seq1	1e-59
TNF receptor-associated factor 3 (EC 2.3.2.27) (CAP-1) (CD40 receptor-associated factor 1) (CRAF1) (CD40-binding protein) (CD40BP) (LMP1-associated protein 1) (LAP1) (RING-type E3 ubiquitin transferase TRAF3)	0.83038	0.010701	0.8956	0.00262668	Q13114	TRAF3 CAP1 CRAF1	comp111428_c0_seq1	4e-84
Tumor necrosis factor alpha-induced protein 3 (TNF alpha-induced protein 3) (EC 2.3.2.-) (EC 3.4.19.12) (Putative DNA-binding protein A20) (Zinc finger protein A20)	0.773759	0.0242603	0.87915	0.00402223	Q60769	Tnfaip3 Tnfip3	comp135976_c1_seq1	5e-26
Serpin B3 (Protein T4-A) (Squamous cell carcinoma antigen 1) (SCCA-1)	0.766746	0.0264356	0.778775	0.0227749	P29508	SERPINB3 SCCA SCCA1	comp134145_c0_seq1	2e-53
TNF receptor-associated factor 3 (EC 2.3.2.27) (CD40 receptor-associated factor 1) (CRAF1) (RING-type E3 ubiquitin transferase TRAF3) (TRAFAMN)	0.715743	0.0458757	0.886551	0.00334686	Q60803	Traf3 Craf1 Trafamn	comp137215_c0_seq1	2e-119
NLR family CARD domain-containing protein 4 (Ice protease-activating factor) (Ipaf)	0.714632	0.0463725	0.791971	0.0191413	F1MHT9	NLRC4 IPAF	comp134691_c0_seq1	2e-24
Protein NLRC5	0.713423	0.0469175	0.746761	0.03328	C6FG12	nlrc5	comp134162_c0_seq1	4e-18
Allograft inflammatory factor 1 (AIF-1) (Ionized calcium-binding adapter molecule 1) (Protein G1)	0.705518	0.0505735	0.762155	0.0279225	P55008	AIF1 G1 IBA1	comp61016_c0_seq1	1e-46
Nuclear factor NF-kappa-B p105 subunit (DNA-binding factor KBF1) (EBP-1) (Nuclear factor of kappa light polypeptide gene enhancer in B-cells 1) [Cleaved into: Nuclear factor NF-kappa-B p50 subunit]	0.686617	0.0599917	0.814954	0.0137237	P19838	NFKB1	comp131713_c2_seq4	5e-88
Nuclear factor NF-kappa-B p105 subunit (DNA-binding factor KBF1) (EBP-1) (Nuclear factor of kappa light polypeptide gene enhancer in B-cells 1) [Cleaved into: Nuclear factor NF-kappa-B p50 subunit]	0.666911	0.0708461	0.638018	0.0887157	P19838	NFKB1	comp131713_c2_seq2	8e-88
Malignant fibrous histiocytoma-amplified sequence 1 homolog	0.659372	0.0752834	0.804497	0.0160489	Q3V1N1	Mfhas1	comp131856_c1_seq10	7e-19
TNF receptor-associated factor 1	0.65318	0.0790463	0.758373	0.0291852	P39428	Traf1	comp124018_c0_seq2	2e-25
Proto-oncogene tyrosine-protein kinase receptor Ret (EC 2.7.10.1) (Cadherin family member 12) (Proto-oncogene c-Ret) [Cleaved into: Soluble RET kinase fragment; Extracellular cell-membrane anchored RET cadherin 120 kDa fragment]	0.650581	0.0806578	0.78377	0.0213533	P07949	RET CDHF12 CDHR16 PTC RET51	comp109947_c0_seq1	3e-63
Transmembrane protein 229B	0.608338	0.109537	0.767622	0.0261576	Q5F3L7	TMEM229B RCJMB04_13p15	comp123409_c1_seq1	4e-40
Anti-lipopolysaccharide factor (anti-LPS)	0.598846	0.116728	0.790477	0.019533	P07087		comp137125_c0_seq3	3e-07
Mitogen-activated protein kinase 6 (MAP kinase 6) (MAPK 6) (EC 2.7.11.24) (Extracellular signal-regulated kinase 3) (ERK-3)	0.523758	0.182771	0.58292	0.129378	Q61532	Mapk6 Erk3 Prkm4 Prkm6	comp121283_c0_seq1	6e-96
NLR family CARD domain-containing protein 4 (CARD, LRR, and NACHT-containing protein) (Clan protein) (Caspase recruitment domain-containing protein 12) (Ice protease-activating factor) (Ipaf)	-0.395662	0.331922	-0.365131	0.373794	Q9NPP4	NLRC4 CARD12 CLAN CLAN1 IPAF UNQ6189/PRO20215	comp137154_c2_seq1	9e-20
Acid sphingomyelinase-like phosphodiesterase 3b (ASM-like phosphodiesterase 3b) (EC 3.1.4.-)	-0.44894	0.264501	-0.679099	0.0640068	Q92485	SMPDL3B ASML3B ASMLPD	comp126490_c0_seq1	2e-141
Protein NLRC5	-0.464882	0.245789	-0.652913	0.0792106	C3VPR6	Nlrc5	comp132556_c0_seq2	3e-06
Tyrosine-protein kinase CSK (EC 2.7.10.2) (C-Src kinase)	-0.619198	0.101626	-0.706349	0.0501812	P41239	CSK	comp131452_c0_seq3	2e-164
RanBP-type and C3HC4-type zinc finger-containing protein 1 (EC 2.3.2.31) (Heme-oxidized IRP2 ubiquitin ligase 1 homolog) (HOIL-1) (Heme-oxidized IRP2 ubiquitin transferase 1 homolog)	-0.643476	0.0851601	-0.738514	0.0363902	E6ZIJ1	rbck1 DLA_XVIII01330	comp132400_c0_seq1	7e-93
TNF receptor-associated factor 4 (Cysteine-rich domain associated with RING and Traf domains protein 1) (Metastatic lymph node gene 62 protein) (MLN 62) (RING finger protein 83)	-0.649322	0.0814447	-0.592709	0.121516	Q9BUZ4	TRAF4 CART1 MLN62 RNF83	comp130637_c2_seq8	8e-55
Alpha-1A adrenergic receptor (Alpha-1A adrenoreceptor) (Alpha-1A adrenoceptor) (Alpha-1C adrenergic receptor)	-0.652479	0.0794789	-0.673546	0.0670721	O02824	ADRA1A ADRA1C	comp135232_c0_seq2	3e-07
Plasminogen receptor (KT) (Plg-R(KT))	-0.70097	0.0527518	-0.862367	0.00586357	D4ACN8	Plgrkt	comp124101_c0_seq1	2e-32
Gag-Pol polyprotein [Cleaved into: Matrix protein p15 (MA); RNA-binding phosphoprotein p12 (pp12); Capsid protein p30 (CA); Nucleocapsid protein p10-Pol (NC-pol); Protease (EC 3.4.23.-); Reverse transcriptase/ribonuclease H (RT) (EC 2.7.7.49) (EC 2.7.7.7) (EC 3.1.26.4); Integrase (IN) (EC 2.7.7.-) (EC 3.1.-.-)]	-0.72061	0.0437359	-0.811746	0.0144128	P21414	pol	comp136806_c0_seq2	2e-08
Dual specificity mitogen-activated protein kinase kinase 1 (MAP kinase kinase 1) (MAPKK 1) (EC 2.7.12.2) (ERK activator kinase 1) (MAPK/ERK kinase 1) (MEK1) (Fragment)	-0.761148	0.0282553	-0.818345	0.0130184	Q91447	MAP2K1 MEK1 PRKMK1	comp133526_c0_seq1	3e-180
Poly [ADP-ribose] polymerase 14 (PARP-14) (EC 2.4.2.30) (ADP-ribosyltransferase diphtheria toxin-like 8) (ARTD8) (B aggressive lymphoma protein 2)	-0.777425	0.0231689	-0.866991	0.00531151	Q460N5	PARP14 BAL2 KIAA1268	comp132805_c1_seq1	7e-68
Carbohydrate sulfotransferase 4 (EC 2.8.2.-) (Galactose/N-acetylglucosamine/N-acetylglucosamine 6-O-sulfotransferase 3) (GST-3) (High endothelial cells N-acetylglucosamine 6-O-sulfotransferase) (HEC-GlcNAc6ST) (L-selectin ligand sulfotransferase) (LSST) (N-acetylglucosamine 6-O-sulfotransferase 2) (GlcNAc6ST-2) (Gn6st-2)	-0.864355	0.00562192	-0.886017	0.00339293	Q8NCG5	CHST4	comp132744_c0_seq1	8e-28
B-cell lymphoma 3 protein (BCL-3) (Proto-oncogene BCL3)	-0.882416	0.0037143	-0.88559	0.00343003	P20749	BCL3 BCL4 D19S37	comp123439_c0_seq1	2e-47
2'-5'-oligoadenylate synthase 1A ((2-5')oligo(A) synthase 1A) (2-5A synthase 1A) (EC 2.7.7.84)	-0.896701	0.00254656	-0.94027	0.000509165	Q05961	Oas1a Oas1	comp134304_c1_seq2	7e-11
Ankyrin repeat domain-containing protein 17 (Gene trap ankyrin repeat protein) (Serologically defined breast cancer antigen NY-BR-16)	-0.927011	0.000919679	-0.92657	0.00093613	O75179	ANKRD17 GTAR KIAA0697	comp126551_c0_seq1	0
RanBP-type and C3HC4-type zinc finger-containing protein 1 (EC 2.3.2.31) (HBV-associated factor 4) (Heme-oxidized IRP2 ubiquitin ligase 1) (HOIL-1) (Hepatitis B virus X-associated protein 4) (RING finger protein 54) (RING-type E3 ubiquitin transferase HOIL-1) (Ubiquitin-conjugating enzyme 7-interacting protein 3)	-0.938269	0.000561204	-0.892831	0.00283515	Q9BYM8	RBCK1 C20orf18 RNF54 UBCE7IP3 XAP3 XAP4	comp129643_c0_seq1	3e-17
Cellular Detoxificaion and redox homeostasis
Multidrug resistance-associated protein 4 (ATP-binding cassette sub-family C member 4) (MRP/cMOAT-related ABC transporter) (Multi-specific organic anion transporter B) (MOAT-B)	0.912673	0.00155775	0.848012	0.00780731	O15439	ABCC4 MRP4	comp128010_c1_seq1	9e-113
Thioredoxin (Trx)	0.90502	0.00199237	0.917877	0.00130073	O96952	THIO	comp126960_c0_seq1	6e-34
Polyamine oxidase (EC 1.5.3.14) (EC 1.5.3.15)	0.865498	0.005486	0.730159	0.039716	O64411	PAO	comp128351_c0_seq1	5e-62
Protein PLANT CADMIUM RESISTANCE 1 (AtPCR1)	0.840424	0.00898172	0.944151	0.000417451	Q9LQU2	PCR1 At1g14880 F10B6.29	comp99574_c0_seq1	1e-12
Sulfiredoxin-1 (EC 1.8.98.2)	0.836792	0.00958145	0.917948	0.00129746	Q9BYN0	SRXN1 C20orf139 SRX SRX1	comp49701_c0_seq1	1e-35
Selenoprotein M (SelM)	0.806327	0.0156254	0.86409	0.00565379	Q8WWX9	SELENOM SELM	comp133786_c0_seq1	5e-13
2-oxoglutarate and iron-dependent oxygenase domain-containing protein 2 (EC 1.14.11.-)	0.80267	0.0164788	0.680089	0.0634695	Q28C22	ogfod2 TEgg127j14.1	comp123436_c0_seq3	1e-27
Cytochrome b-245 light chain (Cytochrome b(558) alpha chain) (Cytochrome b558 subunit alpha) (Neutrophil cytochrome b 22 kDa polypeptide) (Superoxide-generating NADPH oxidase light chain subunit) (p22 phagocyte B-cytochrome) (p22-phox) (p22phox)	0.782423	0.021731	0.624189	0.0981038	Q62737	Cyba	comp124681_c0_seq1	7e-37
Superoxide dismutase [Cu-Zn] (EC 1.15.1.1)	0.773133	0.0244497	0.854573	0.00687489	O04996	SODCC	comp136102_c0_seq10	1e-07
Glutathione S-transferase omega-1 (GSTO-1) (EC 2.5.1.18) (Glutathione S-transferase omega 1-1) (GSTO 1-1) (Glutathione-dependent dehydroascorbate reductase) (EC 1.8.5.1) (Monomethylarsonic acid reductase) (MMA(V) reductase) (EC 1.20.4.2) (S-(Phenacyl)glutathione reductase) (SPG-R) (p28)	0.752733	0.0311327	0.895546	0.00263059	O09131	Gsto1 Gstx Gtsttl	comp132045_c0_seq2	8e-50
Synaptic vesicle membrane protein VAT-1 homolog (EC 1.-.-.-)	0.718712	0.0445629	0.723406	0.0425344	Q8JFV8	vat1 si:dz163l24.2	comp136198_c0_seq3	1e-31
Peroxiredoxin-1 (EC 1.11.1.15)	0.631882	0.0928138	0.626664	0.0963837	P0CB50	PRDX1	comp124231_c0_seq1	8e-104
3-hydroxybutyrate dehydrogenase type 2 (EC 1.1.1.-) (EC 1.1.1.30) (R-beta-hydroxybutyrate dehydrogenase)	0.624565	0.0978414	0.736644	0.0371192	C1C4R8	bdh2	comp136239_c0_seq1	3e-113
Carbonyl reductase [NADPH] 1 (EC 1.1.1.184) (15-hydroxyprostaglandin dehydrogenase [NADP(+)]) (EC 1.1.1.197) (20-beta-hydroxysteroid dehydrogenase) (NADPH-dependent carbonyl reductase 1) (Prostaglandin 9-ketoreductase) (Prostaglandin-E(2) 9-reductase) (EC 1.1.1.189)	0.574547	0.136322	0.701467	0.0525112	P47844	CBR1 CBR	comp128771_c1_seq1	2e-43
Cytochrome b-245 heavy chain (EC 1.-.-.-) (CGD91-phox) (Cytochrome b(558) subunit beta) (Cytochrome b558 subunit beta) (Heme-binding membrane glycoprotein gp91phox) (NADPH oxidase 2) (Neutrophil cytochrome b 91 kDa polypeptide) (Superoxide-generating NADPH oxidase heavy chain subunit) (gp91-1) (gp91-phox) (p22 phagocyte B-cytochrome)	0.503078	0.203798	0.602754	0.113735	P04839	CYBB NOX2	comp131939_c0_seq1	3e-108
Selenoprotein M (SelM)	0.289834	0.486228	0.451996	0.260862	Q8WWX9	SELENOM SELM	comp133786_c0_seq4	4e-13
Thioredoxin-related transmembrane protein 1 (Thioredoxin domain-containing protein 1)	-0.424368	0.294678	-0.442099	0.272742	Q0Z7W6	TMX1 TXNDC1	comp133173_c0_seq1	2e-50
Serine palmitoyltransferase small subunit A (Small subunit of serine palmitoyltransferase A) (ssSPTa)	0.718886	0.0444865	0.658362	0.0758896	B9EN89	sptssa ssspta	comp127305_c0_seq1	7e-13
Sulfhydryl oxidase 1 (EC 1.8.3.2) (FAD-dependent sulfhydryl oxidase-3) (SOx-3) (Glandular epithelial cells protein 3) (Quiescin Q6)	-0.485047	0.223115	-0.617115	0.103117	O08841	QSOX1 GEC3 QSCN6 SOX3	comp64144_c0_seq1	1e-109
Glutathione peroxidase (GPX) (EC 1.11.1.9)	-0.534429	0.172398	-0.663572	0.0727917	Q00277	GPX1	comp128422_c0_seq1	2e-58
SH3 domain-binding glutamic acid-rich-like protein 3	-0.568807	0.141199	-0.758235	0.0292319	Q5RC61	SH3BGRL3	comp128489_c0_seq1	4e-14
Copper transport protein ATOX1 (Metal transport protein ATX1)	-0.593982	0.120514	-0.739195	0.036127	Q3T0E0	ATOX1	comp123955_c0_seq1	2e-16
Multidrug resistance-associated protein 4 (ATP-binding cassette sub-family C member 4) (MRP/cMOAT-related ABC transporter) (Multi-specific organic anion transporter B) (MOAT-B)	-0.636196	0.0899214	-0.678152	0.0645237	O15439	ABCC4 MRP4	comp135856_c0_seq1	7e-124
Thioredoxin-related transmembrane protein 2-A	-0.663418	0.0728826	-0.784149	0.0212476	A8WG88	tmx2a zgc:172264	comp130653_c0_seq1	5e-61
Glutathione S-transferase U20 (AtGSTU20) (EC 2.5.1.18) (FIN219-interacting protein 1) (GST class-tau member 20)	-0.681685	0.0626081	-0.772118	0.0247589	Q8L7C9	GSTU20 FIP1 At1g78370 F3F9.11	comp131127_c0_seq1	2e-31
Maleylacetoacetate isomerase (MAAI) (EC 5.2.1.2) (GSTZ1-1) (Glutathione S-transferase zeta 1) (EC 2.5.1.18)	-0.722217	0.0430429	-0.860256	0.00612732	Q9WVL0	Gstz1 Maai	comp118093_c0_seq1	3e-89
Chorion peroxidase (EC 1.11.1.7)	-0.756372	0.0298674	-0.902329	0.00216207	Q7QH73	pxt AGAP004038	comp130048_c0_seq1	7e-79
Microsomal glutathione S-transferase 3 (Microsomal GST-3) (EC 2.5.1.18) (Microsomal GST-III)	-0.763969	0.027329	-0.849632	0.00756994	Q9CPU4	Mgst3	comp118999_c0_seq1	3e-31
Glyoxylate reductase/hydroxypyruvate reductase (EC 1.1.1.79) (EC 1.1.1.81)	-0.772258	0.0247162	-0.806883	0.0154983	Q9UBQ7	GRHPR GLXR MSTP035	comp133444_c0_seq3	2e-108
SH3 domain-binding glutamic acid-rich-like protein 3	-0.776224	0.023523	-0.844515	0.00833558	Q91VW3	Sh3bgrl3	comp122285_c0_seq1	1e-11
17-beta-hydroxysteroid dehydrogenase type 6 (17-beta-HSD 6) (17-beta-HSD6) (EC 1.1.1.105) (EC 1.1.1.239) (EC 1.1.1.62) (3-alpha->beta-hydroxysteroid epimerase) (3-alpha->beta-HSE) (Oxidative 3-alpha hydroxysteroid dehydrogenase) (Short chain dehydrogenase/reductase family 9C member 6)	-0.797951	0.0176223	-0.863918	0.00567458	O14756	HSD17B6 RODH SDR9C6	comp131697_c0_seq1	4e-39
Xanthine dehydrogenase/oxidase [Includes: Xanthine dehydrogenase (XD) (EC 1.17.1.4); Xanthine oxidase (XO) (EC 1.17.3.2) (Xanthine oxidoreductase) (XOR)]	-0.864865	0.00556102	-0.808713	0.015084	Q00519	Xdh	comp135791_c0_seq5	1e-46
Acyl-lipid (8-3)-desaturase (EC 1.14.19.30) (Delta(5) fatty acid desaturase) (Delta-5 fatty acid desaturase)	-0.887407	0.00327385	-0.850236	0.0074827	O74212	DES1	comp122532_c0_seq1	6e-28
Protein PRY1 (Pathogenesis-related protein 1)	-0.945085	0.000397143	-0.888301	0.00319876	P47032	PRY1 YJL079C J1022	comp115533_c0_seq1	1e-28
Putative tyrosinase-like protein tyr-3	-0.960939	0.000144667	-0.933858	0.000687977	Q19673	tyr-3 F21C3.2	comp114496_c0_seq1	9e-17
Cell Survival
Caspase-7 (CASP-7) (EC 3.4.22.60) (Apoptotic protease Mch-3) (ICE-like apoptotic protease 3) (ICE-LAP3) (SREBP cleavage activity 2) (SCA-2) [Cleaved into: Caspase-7 subunit p20; Caspase-7 subunit p11]	0.975503	3.61e-05	0.9486	0.000326539	P55214	CASP7 MCH3	comp136573_c0_seq1	2e-39
Actin-related protein 10 (Actin-related protein 11)	-0.961034	0.000143619	-0.951071	0.000282208	Q9QZB7	Actr10 Act11 Actr11 Arp11	comp134573_c0_seq1	3e-121
Ras-related GTP-binding protein A (Rag A) (RagA)	0.912427	0.00157065	0.85696	0.00655413	Q80X95	Rraga	comp134587_c0_seq2	8e-179
Prostate stem cell antigen	0.890269	0.00303725	0.909916	0.00170633	P57096	Psca	comp114772_c0_seq1	3e-06
Caspase activity and apoptosis inhibitor 1 (Conserved anti-apoptotic protein) (CAAP)	0.883827	0.00358613	0.892979	0.00282372	Q8VDY9	Caap1 Caap	comp136635_c0_seq1	1e-10
Stromelysin-3 (SL-3) (ST3) (EC 3.4.24.-) (Matrix metalloproteinase-11) (MMP-11)	0.852214	0.00720147	0.884303	0.00354357	P24347	MMP11 STMY3	comp125045_c1_seq1	1e-13
BCL2/adenovirus E1B 19 kDa protein-interacting protein 3-like (NIP3-like protein X) (NIP3L)	0.827892	0.0111566	0.820784	0.0125254	Q9Z2F7	Bnip3l Nix	comp135095_c1_seq1	1e-11
Transmembrane protein 59	0.756518	0.0298173	0.899108	0.00237711	Q2F7Z7	TMEM59	comp134150_c0_seq1	9e-16
Apoptosis regulator R1 (XR1) (Fragment)	0.746986	0.0331973	0.822675	0.0121515	Q91827		comp133797_c1_seq1	1e-23
Uncharacterized protein C6orf106 homolog	0.659372	0.0752834	0.804497	0.0160489	Q3TT38	D17Wsu92e	comp133255_c0_seq5	2e-18
SAP30-binding protein (Transcriptional regulator protein HCNGP)	0.653118	0.079084	0.806704	0.0155392	Q9UHR5	SAP30BP HCNGP HTRG HTRP	comp122772_c0_seq1	2e-32
Sorting nexin-14	0.591528	0.12245	0.72341	0.0425327	Q8BHY8	Snx14	comp136675_c1_seq13	3e-89
Serine/threonine-protein phosphatase 4 regulatory subunit 2 (PPP4R2-related protein)	0.562634	0.14655	0.518428	0.188074	Q9W2U4	PPP4R2r CG2890	comp135422_c0_seq1	2e-33
Bifunctional apoptosis regulator (RING finger protein 47)	0.553636	0.154548	0.622449	0.0993238	Q9NZS9	BFAR BAR RNF47	comp126349_c0_seq1	4e-76
Krueppel-like factor 11 (Transforming growth factor-beta-inducible early growth response protein 2) (TGFB-inducible early growth response protein 2) (TIEG-2)	-0.563826	0.145509	-0.652083	0.0797237	O14901	KLF11 FKLF TIEG2	comp106909_c0_seq1	2e-56
Organic cation transporter protein	-0.605244	0.111852	-0.640403	0.0871512	Q9VCA2	Orct CG6331	comp135995_c0_seq1	1e-59
Apoptosis regulatory protein Siva (CD27-binding protein) (CD27BP)	-0.608929	0.109097	-0.664659	0.0721552	O15304	SIVA1 SIVA	comp126203_c0_seq1	2e-07
Protein BTG1 (B-cell translocation gene 1 protein)	-0.689168	0.0586643	-0.713463	0.046899	P34743	BTG1	comp109441_c0_seq1	5e-37
CUB and sushi domain-containing protein 1 (CUB and sushi multiple domains protein 1)	-0.755434	0.0301903	-0.805063	0.0159173	Q96PZ7	CSMD1 KIAA1890 UNQ5952/PRO19863	comp130513_c0_seq1	4e-72
Activating molecule in BECN1-regulated autophagy protein 1	-0.766616	0.0264769	-0.855896	0.00669585	Q9C0C7	AMBRA1 KIAA1736	comp123375_c0_seq2	2e-66
RB1-inducible coiled-coil protein 1 (FAK family kinase-interacting protein of 200 kDa) (FIP200)	-0.782463	0.0217198	-0.726371	0.0412824	Q8TDY2	RB1CC1 KIAA0203 RBICC	comp132331_c0_seq2	4e-10
Tectonin beta-propeller repeat-containing protein 1	-0.786328	0.0206471	-0.770135	0.0253699	Q7Z6L1	TECPR1 KIAA1358	comp136215_c1_seq1	2e-77
ER membrane protein complex subunit 4 (Transmembrane protein 85)	-0.841142	0.00886621	-0.76376	0.0273969	B5XB24	emc4 tmem85	comp129355_c0_seq1	3e-47
RB1-inducible coiled-coil protein 1 (Coiled-coil-forming protein 1) (FAK family kinase-interacting protein of 200 kDa) (FIP200) (LaXp180)	-0.893543	0.00278052	-0.910834	0.0016559	Q9ESK9	Rb1cc1 Cc1 Kiaa0203	comp132331_c0_seq1	5e-31
Signal transducing adapter molecule 1 (STAM-1)	-0.905788	0.00194559	-0.898729	0.00240331	Q92783	STAM STAM1	comp124410_c0_seq5	4e-17
Protein lifeguard 2 (Fas apoptotic inhibitory molecule 2)	-0.913994	0.00148965	-0.866808	0.00533277	Q1LZ71	FAIM2 LFG2	comp135462_c0_seq1	6e-35
Protein Transport
EH domain-containing protein 1 (AtEHD1) (EC 3.6.5.2)	0.963516	0.000118114	0.955083	0.000218997	Q94CF0	EHD1 At3g20290 MQC12.3	comp127968_c0_seq2	2e-09
Syntaxin-6	0.930816	0.000785489	0.856115	0.00666658	O43752	STX6	comp37912_c0_seq1	1e-70
Ras-related protein Rab-22A (Rab-22) (Rab-14)	0.928203	0.000876146	0.844062	0.00840554	P35285	Rab22a Rab22	comp115985_c0_seq1	2e-73
Protein brunelleschi (NIK- and IKBKB-binding protein)	0.906829	0.00188335	0.895751	0.00261556	Q9VIL0	brun bru CG2478	comp128078_c0_seq1	4e-09
Rabphilin-3A (Exophilin-1)	0.843821	0.0084431	0.923292	0.00106446	P47708	Rph3a	comp131982_c1_seq1	6e-22
Importin subunit alpha-3 (Importin alpha Q1) (Qip1) (Karyopherin subunit alpha-4)	0.875324	0.00440317	0.911199	0.0016361	O35343	Kpna4 Qip1	comp122621_c0_seq1	7e-162
TBC1 domain family member 23	0.843424	0.00850488	0.933464	0.000700141	Q5F415	TBC1D23 RCJMB04_3n7	comp125839_c0_seq1	0
Synaptotagmin-16 (Synaptotagmin 14-like protein) (Synaptotagmin XIV-related protein)	0.828961	0.0109593	0.902687	0.00213898	Q7TN83	Syt16 Strep14 Syt14l Syt14r	comp129383_c0_seq1	1e-06
Tripartite motif-containing protein 3 (Brain-expressed RING finger protein) (RING finger protein 22)	0.827792	0.0111751	0.939464	0.000529732	O70277	Trim3 Berp Rnf22	comp136627_c1_seq2	1e-09
Vacuolar fusion protein CCZ1 homolog	0.823964	0.0119006	0.831519	0.0104963	A7RJI7	v1g238755	comp125376_c0_seq1	9e-59
Protein ERGIC-53 (ER-Golgi intermediate compartment 53 kDa protein) (Lectin mannose-binding 1) (p58)	0.821666	0.0123501	0.756647	0.0297732	Q9D0F3	Lman1 Ergic53	comp131549_c0_seq1	6e-41
Golgi-specific brefeldin A-resistance guanine nucleotide exchange factor 1 (BFA-resistant GEF 1)	0.804565	0.016033	0.741745	0.0351516	Q9R1D7	GBF1	comp124514_c0_seq1	2e-175
Cation-independent mannose-6-phosphate receptor (CI Man-6-P receptor) (CI-MPR) (M6PR) (300 kDa mannose 6-phosphate receptor) (MPR 300) (Insulin-like growth factor 2 receptor) (Insulin-like growth factor II receptor) (IGF-II receptor) (M6P/IGF2 receptor) (M6P/IGF2R) (CD antigen CD222)	0.795687	0.0181881	0.876852	0.0042484	P11717	IGF2R MPRI	comp136710_c0_seq1	4e-57
Golgi SNAP receptor complex member 1 (28 kDa Golgi SNARE protein) (28 kDa cis-Golgi SNARE p28)	0.792626	0.0189711	0.90343	0.00209153	Q5RBL6	GOSR1	comp130736_c0_seq1	1e-80
Peflin (PEF protein with a long N-terminal hydrophobic domain) (Penta-EF hand domain-containing protein 1)	0.777332	0.0231964	0.755632	0.0301221	Q9UBV8	PEF1 ABP32 UNQ1845/PRO3573	comp130406_c0_seq3	1e-48
Kelch-like protein 20	0.775469	0.0237473	0.819968	0.012689	Q6DFF6	klhl20	comp128919_c0_seq1	3e-07
Sorting nexin-2 (Transformation-related gene 9 protein) (TRG-9)	0.752414	0.0312453	0.634639	0.0909596	O60749	SNX2 TRG9	comp121298_c0_seq1	8e-149
Inactive rhomboid protein 1 (iRhom1) (Rhomboid family member 1)	0.745756	0.0336499	0.880246	0.00391707	Q6GMF8	rhbdf1 zgc:91984	comp105822_c0_seq1	5e-149
Sorting nexin-24	0.714426	0.0464653	0.900029	0.00231426	Q9Y343	SNX24 SBBI31 UNQ654/PRO1284	comp116928_c0_seq1	1e-19
ADP-ribosylation factor-like protein 5B (ADP-ribosylation factor-like protein 8)	0.71203	0.0475495	0.76451	0.0271534	Q96KC2	ARL5B ARL8	comp127822_c0_seq1	3e-96
GPN-loop GTPase 1 (EC 3.6.5.-) (MBD2-interacting protein) (MBDin) (XPA-binding protein 1)	0.698208	0.0541019	0.753819	0.0307517	Q8VCE2	Gpn1 Mbdin Xab1	comp126379_c0_seq1	1e-132
Ras-related protein Rab-18-B	0.676603	0.065374	0.788506	0.0200573	Q6DHC1	rab18b rab18 zgc:92523	comp126113_c0_seq1	2e-99
Spectrin alpha chain, non-erythrocytic 1 (Alpha-II spectrin) (Fodrin alpha chain) (Spectrin, non-erythroid alpha subunit)	0.667967	0.0702376	0.79021	0.0196035	Q13813	SPTAN1 NEAS SPTA2	comp136839_c0_seq1	3e-84
Conserved oligomeric Golgi complex subunit 3 (COG complex subunit 3) (Component of oligomeric Golgi complex 3) (Vesicle-docking protein SEC34 homolog) (p94)	0.650465	0.0807297	0.77293	0.0245114	Q96JB2	COG3 SEC34	comp130227_c1_seq1	1e-80
Sorting nexin-10A	0.56697	0.14278	0.546643	0.160924	F1Q506	snx10a im:7153949	comp135578_c0_seq1	2e-23
Transmembrane emp24 domain-containing protein 1 (p24 family protein gamma-1) (p24gamma1)	0.332908	0.420383	0.427203	0.291116	Q28BQ6	tmed1 TNeu055d12.1	comp126562_c1_seq1	3e-31
GRIP and coiled-coil domain-containing protein 1 (Golgi coiled-coil protein 1)	0.295994	0.476575	0.533366	0.173417	Q9D4H2	Gcc1	comp135684_c0_seq1	3e-54
Intraflagellar transport protein 27 homolog (IFT27) (Putative GTP-binding protein RAY-like) (Rab-like protein 4)	-0.40362	0.321388	-0.346088	0.40104	Q0VCN3	IFT27 RABL4 RAYL	comp119229_c0_seq1	7e-73
Sorting nexin-6 [Cleaved into: Sorting nexin-6, N-terminally processed]	-0.543036	0.164268	-0.659099	0.0754471	Q6P8X1	Snx6	comp128776_c0_seq1	4e-31
Probable trafficking protein particle complex subunit 2	-0.556739	0.151764	-0.755344	0.0302217	A7RVK7	v1g94938	comp128188_c1_seq1	1e-65
Charged multivesicular body protein 5 (Chromatin-modifying protein 5)	-0.599116	0.11652	-0.759519	0.0287989	Q5FW29	chmp5 TTpA012b21.1	comp124883_c1_seq1	3e-83
E3 ubiquitin-protein ligase RBBP6 (EC 2.3.2.27) (Proliferation potential-related protein) (Protein P2P-R) (RING-type E3 ubiquitin transferase RBBP6) (Retinoblastoma-binding protein 6) (p53-associated cellular protein of testis)	0.393691	0.334557	0.457438	0.254442	P97868	Rbbp6 P2pr Pact	comp121250_c0_seq1	9e-25
Cation-independent mannose-6-phosphate receptor (CI Man-6-P receptor) (CI-MPR) (M6PR) (300 kDa mannose 6-phosphate receptor) (MPR 300) (Insulin-like growth factor 2 receptor) (Insulin-like growth factor II receptor) (IGF-II receptor) (M6P/IGF2 receptor) (M6P/IGF2R) (CD antigen CD222)	-0.602221	0.114142	-0.637625	0.0889746	P11717	IGF2R MPRI	comp70445_c0_seq1	2e-14
Lethal(2) giant larvae protein homolog 1 (LLGL) (Mgl-1) (Mlgl)	-0.633104	0.0919895	-0.807248	0.0154151	Q80Y17	Llgl1 Llglh	comp123702_c0_seq1	0
ADP-ribosylation factor 3 (Liver regeneration-related protein LRRG202)	-0.654988	0.0779359	-0.812514	0.014246	P61206	Arf3 Ac1-253	comp127027_c0_seq1	2e-83
Lysosome membrane protein 2 (85 kDa lysosomal membrane sialoglycoprotein) (LGP85) (CD36 antigen-like 2) (Lysosome membrane protein II) (LIMP II) (Scavenger receptor class B member 2) (CD antigen CD36)	-0.684303	0.0612108	-0.742095	0.0350187	P27615	Scarb2 Cd36l2 Limpii	comp132379_c0_seq1	3e-88
Major facilitator superfamily domain-containing protein 1	-0.709345	0.0487826	-0.765404	0.0268648	Q5R8G5	MFSD1	comp129026_c0_seq3	5e-51
Tripartite motif-containing protein 3 (RING finger protein 22) (RING finger protein HAC1)	-0.764585	0.027129	-0.75889	0.0290105	Q9R1R2	Trim3 Hac1 Rnf22	comp127616_c1_seq1	2e-11
Protein cornichon homolog 4 (CNIH-4) (Cornichon family AMPA receptor auxiliary protein 4)	-0.864058	0.00565766	-0.781561	0.021975	Q6P3N5	cnih4	comp126227_c0_seq1	8e-55
Coatomer subunit gamma-2 (Gamma-2-coat protein) (Gamma-2-COP)	-0.912757	0.00155338	-0.889766	0.00307804	Q9I8E6	copg2	comp126163_c0_seq2	0
UDP-N-acetylglucosamine--dolichyl-phosphate N-acetylglucosaminephosphotransferase (EC 2.7.8.15) (GlcNAc-1-P transferase) (G1PT) (GPT) (N-acetylglucosamine-1-phosphate transferase)	-0.339775	0.410256	-0.513302	0.193251	Q9H3H5	DPAGT1 DPAGT2	comp136801_c0_seq1	2e-151
Rabphilin-3A (Exophilin-1)	-0.919127	0.00124346	-0.982589	1.3e-05	P47708	Rph3a	comp131982_c1_seq1	6e-22
Pleckstrin homology domain-containing family A member 8 (PH domain-containing family A member 8)	-0.972893	4.88e-05	-0.956231	0.000202797	Q5U3N0	plekha8 zgc:101886	comp133764_c0_seq1	1e-111
Lipid Metabolism
Cholesterol 24-hydroxylase (CH24H) (EC 1.14.14.25) (Cytochrome P450 46A1)	0.974077	4.27e-05	0.931708	0.000756008	Q9WVK8	Cyp46a1 Cyp46	comp87552_c0_seq1	6e-47
Lysophospholipid acyltransferase 7 (LPLAT 7) (EC 2.3.1.-) (1-acylglycerophosphatidylinositol O-acyltransferase) (EC 2.3.1.n4) (Bladder and breast carcinoma-overexpressed gene 1 protein) (Leukocyte receptor cluster member 4) (Lysophosphatidylinositol acyltransferase) (LPIAT) (Lyso-PI acyltransferase) (Membrane-bound O-acyltransferase domain-containing protein 7) (O-acyltransferase domain-containin…	0.947069	0.000356172	0.892238	0.00288107	Q96N66	MBOAT7 BB1 LENG4 OACT7	comp120334_c0_seq2	5e-46
Sterol regulatory element-binding protein 1 (SREBP-1) (Sterol regulatory element-binding transcription factor 1) [Cleaved into: Processed sterol regulatory element-binding protein 1]	0.923958	0.00103753	0.941953	0.000467915	Q9WTN3	Srebf1 Srebp1	comp134810_c3_seq2	1e-154
Testis-expressed protein 2 (Transmembrane protein 96)	0.911479	0.00162103	0.934127	0.000679755	Q8IWB9	TEX2 KIAA1738 TMEM96	comp132442_c0_seq1	1e-37
2-acylglycerol O-acyltransferase 1 (EC 2.3.1.22) (Acyl CoA:monoacylglycerol acyltransferase 1) (MGAT1) (Monoacylglycerol O-acyltransferase 1)	0.8834	0.00362461	0.953372	0.00024466	Q70VZ7	MOGAT1	comp135660_c0_seq1	2e-108
ATP-binding cassette sub-family A member 2 (ATP-binding cassette transporter 2) (ATP-binding cassette 2)	0.881927	0.00375942	0.865819	0.00544815	Q9BZC7	ABCA2 ABC2 KIAA1062	comp134981_c0_seq1	0
Serine palmitoyltransferase small subunit A (Small subunit of serine palmitoyltransferase A) (ssSPTa)	0.826551	0.0114073	0.85457	0.00687525	B9EN89	sptssa ssspta	comp127305_c0_seq1	7e-13
Palmitoyltransferase ZDHHC5 (EC 2.3.1.225) (Zinc finger DHHC domain-containing protein 5) (DHHC-5)	0.821305	0.0124216	0.917124	0.0013361	E1BLT8	ZDHHC5	comp130927_c0_seq1	3e-16
Ethylmalonyl-CoA decarboxylase (EC 4.1.1.94) (Enoyl-CoA hydratase domain-containing protein 1) (Methylmalonyl-CoA decarboxylase) (MMCD) (EC 4.1.1.41)	0.815406	0.0136285	0.753586	0.0308333	F1R6N4	echdc1	comp134084_c0_seq1	2e-41
2-acylglycerol O-acyltransferase 2-A (EC 2.3.1.22) (Acyl-CoA:monoacylglycerol acyltransferase 2-A) (MGAT2-A) (Monoacylglycerol O-acyltransferase 2-A)	0.790327	0.0195726	0.774437	0.0240563	Q2KHS5	mogat2-a	comp129133_c0_seq1	5e-100
Forkhead box protein O1-B	0.811753	0.0144114	0.858719	0.00632408	A3RK75	foxo1b foxO1a.2	comp121159_c0_seq2	3e-25
Protein ABHD4 (EC 3.-.-.-) (Alpha/beta hydrolase domain-containing protein 4) (Abhydrolase domain-containing protein 4) (Alpha/beta-hydrolase 4) (Lyso-N-acylphosphatidylethanolamine lipase)	0.760951	0.0283208	0.833243	0.0101913	Q8TB40	ABHD4	comp135598_c0_seq4	1e-128
Acyl-CoA desaturase (EC 1.14.19.1) (Delta(9)-desaturase) (Delta-9 desaturase) (Fatty acid desaturase) (Stearoyl-CoA desaturase)	0.731768	0.0390619	0.792572	0.018985	Q95MI7	SCD	comp127692_c0_seq6	8e-54
Dihydroxyacetone phosphate acyltransferase (DAP-AT) (DHAP-AT) (EC 2.3.1.42) (Acyl-CoA:dihydroxyacetonephosphateacyltransferase) (Glycerone-phosphate O-acyltransferase)	0.721863	0.0431948	0.855415	0.00676063	P98192	Gnpat Dhapat	comp132499_c0_seq1	3e-74
Dehydrodolichyl diphosphate synthase complex subunit DHDDS (EC 2.5.1.87) (Cis-isoprenyltransferase) (CIT) (Cis-IPTase) (Cis-prenyltransferase subunit hCIT) (Epididymis tissue protein Li 189m)	0.709889	0.0485312	0.507266	0.199442	Q86SQ9	DHDDS HDS	comp130745_c1_seq1	2e-117
S-acyl fatty acid synthase thioesterase, medium chain (EC 3.1.2.14) (Oleoyl-ACP hydrolase) (Thioesterase II) (Thioesterase domain-containing protein 1)	0.686213	0.0602032	0.790055	0.0196444	Q8R197	Olah Thedc1	comp127329_c0_seq1	9e-56
Phosphatidylinositol 4,5-bisphosphate 5-phosphatase A (EC 3.1.3.56) (Inositol polyphosphate 5-phosphatase J)	0.667013	0.0707875	0.791114	0.0193653	Q15735	INPP5J PIB5PA PIPP	comp132106_c0_seq1	2e-47
Oxysterol-binding protein-related protein 2 (ORP-2) (OSBP-related protein 2)	0.616129	0.103827	0.687504	0.0595283	Q8BX94	Osbpl2	comp136633_c0_seq1	5e-140
Peroxisomal acyl-coenzyme A oxidase 1 (AOX) (EC 1.3.3.6) (Palmitoyl-CoA oxidase)	0.537821	0.169168	0.527376	0.179218	Q9Z1N0	ACOX1 PCOX1	comp136969_c0_seq1	0
Cycloartenol-C-24-methyltransferase 1 (EC 2.1.1.41) (24-sterol C-methyltransferase 1) (Sterol C-methyltransferase 1)	0.488267	0.219599	0.515932	0.190587	Q6ZIX2	Smt1-1 Os07g0206700 LOC_Os07g10600 OJ1119_B04.19-1	comp133599_c0_seq4	5e-83
Laccase domain-containing protein 1 (Fatty acid metabolism-immunity nexus)	0.477073	0.231948	0.598599	0.116919	Q8IV20	LACC1 C13orf31 FAMIN	comp125739_c0_seq1	5e-74
Lysosomal acid lipase/cholesteryl ester hydrolase (Acid cholesteryl ester hydrolase) (LAL) (EC 3.1.1.13) (Cholesteryl esterase) (Lipase A) (Sterol esterase)	-0.339558	0.410574	-0.504374	0.202445	P38571	LIPA	comp137032_c1_seq1	4e-125
Phospholipase ABHD3 (EC 3.1.1.32) (EC 3.1.1.4) (Abhydrolase domain-containing protein 3)	-0.495919	0.211358	-0.488352	0.219507	Q8WU67	ABHD3	comp131359_c0_seq2	9e-106
3-hydroxypropionyl-coenzyme A dehydratase (3-hydroxypropionyl-CoA dehydratase) (EC 4.2.1.116)	-0.548578	0.159146	-0.506899	0.199822	A4YI89	Msed_2001	comp133277_c2_seq1	6e-38
Elongation of very long chain fatty acids protein 4 (EC 2.3.1.199) (3-keto acyl-CoA synthase Elovl4) (ELOVL fatty acid elongase 4) (ELOVL FA elongase 4) (Very long chain 3-ketoacyl-CoA synthase 4) (Very long chain 3-oxoacyl-CoA synthase 4)	-0.608156	0.109672	-0.703406	0.0515783	Q9EQC4	Elovl4	comp130074_c0_seq1	4e-77
START domain-containing protein 10 (StARD10) (PCTP-like protein) (PCTP-L) (Serologically defined colon cancer antigen 28 homolog) (StAR-related lipid transfer protein 10)	-0.701074	0.0527013	-0.727739	0.0407127	Q9JMD3	Stard10 Pctpl Sdccag28 Sdccagg28	comp136706_c0_seq1	2e-55
Androgen-induced gene 1 protein (AIG-1)	-0.712811	0.0471943	-0.762247	0.027892	Q9D8B1	Aig1	comp134437_c1_seq14	2e-31
Elongation of very long chain fatty acids protein 4 (EC 2.3.1.199) (3-keto acyl-CoA synthase ELOVL4) (ELOVL fatty acid elongase 4) (ELOVL FA elongase 4) (Very long chain 3-ketoacyl-CoA synthase 4) (Very long chain 3-oxoacyl-CoA synthase 4)	-0.719399	0.0442625	-0.870726	0.00489092	Q9GZR5	ELOVL4	comp130074_c0_seq3	7e-76
Failed axon connections homolog	-0.80445	0.01606	-0.807934	0.0152594	D3ZAT9	Faxc	comp125002_c0_seq1	2e-38
Vigilin (High density lipoprotein-binding protein) (HDL-binding protein)	-0.732447	0.0387875	-0.83962	0.00911244	Q00341	HDLBP HBP VGL	comp123337_c0_seq1	0
Phytanoyl-CoA dioxygenase, peroxisomal (EC 1.14.11.18) (Phytanic acid oxidase) (Phytanoyl-CoA alpha-hydroxylase) (PhyH)	-0.746281	0.0334562	-0.828548	0.0110353	O14832	PHYH PAHX	comp128841_c0_seq2	2e-128
ATP-binding cassette sub-family A member 1 (ATP-binding cassette transporter 1) (ABC-1) (ATP-binding cassette 1)	-0.754259	0.0305982	-0.837861	0.00940238	P41233	Abca1 Abc1	comp133307_c0_seq1	0
3-hydroxy-3-methylglutaryl-coenzyme A reductase (HMG-CoA reductase) (EC 1.1.1.34)	-0.760155	0.028586	-0.907086	0.00186818	A7Z064	HMGCR	comp133268_c0_seq1	0
Fatty acid hydroxylase domain-containing protein 2	-0.793267	0.0188055	-0.912675	0.00155766	Q9GKT2	FAXDC2 QccE-20373 QflA-14437	comp123866_c1_seq1	8e-119
Non-specific lipid-transfer protein (NSL-TP) (EC 2.3.1.176) (Propanoyl-CoA C-acyltransferase) (SCP-chi) (SCPX) (Sterol carrier protein 2) (SCP-2) (Sterol carrier protein X) (SCP-X)	-0.830346	0.010707	-0.937731	0.00057577	O62742	SCP2	comp136732_c0_seq1	0
Oxysterol-binding protein-related protein 11 (ORP-11) (OSBP-related protein 11)	-0.884927	0.00348825	-0.917208	0.00133211	Q9BXB4	OSBPL11 ORP11 OSBP12	comp134016_c0_seq1	7e-155
Cytochrome P450 4V2 (EC 1.14.14.-) (Docosahexaenoic acid omega-hydroxylase CYP4V2) (EC 1.14.14.79)	-0.904809	0.00200535	-0.911144	0.00163908	Q9DBW0	Cyp4v2 Cyp4v3	comp132209_c1_seq1	5e-124
Cytochrome P450 4V2 (EC 1.14.14.-) (Docosahexaenoic acid omega-hydroxylase CYP4V2) (EC 1.14.14.79)	-0.915683	0.00140545	-0.974962	3.85e-05	Q9DBW0	Cyp4v2 Cyp4v3	comp132209_c1_seq2	7e-156
Transcription and Translation
Iroquois-class homeodomain protein IRX-6 (Homeodomain protein IRXB3) (Iroquois homeobox protein 6)	0.975503	3.61e-05	0.9486	0.000326539	P26686	B52 E(Dfd) RS55 SR55 CG10851	comp124026_c0_seq1	5e-14
Serine-arginine protein 55 (SRP55) (52 kDa bracketing protein) (B52 protein) (Protein enhancer of deformed)	0.940034	0.000515138	0.963853	0.000114898	Q9WTP3	Spdef Pdef Pse	comp111943_c0_seq1	2e-19
tRNA:m(4)X modification enzyme TRM13 homolog (EC 2.1.1.225) (Coiled-coil domain-containing protein 76)	0.936229	0.000617747	0.833481	0.0101497	Q9Z120	Mettl1	comp123339_c0_seq2	6e-116
SAM pointed domain-containing Ets transcription factor (Prostate epithelium-specific Ets transcription factor) (Prostate-specific Ets) (Prostate-derived Ets factor)	0.934649	0.000663979	0.835755	0.00975724	Q6ZWM4	Lsm8	comp130280_c0_seq6	4e-45
U6 snRNA-associated Sm-like protein LSm8	0.930339	0.000801554	0.952409	0.000259949	Q12872	SFSWAP SFRS8 SWAP	comp125698_c0_seq1	8e-18
Splicing factor, suppressor of white-apricot homolog (Splicing factor, arginine/serine-rich 8) (Suppressor of white apricot protein homolog)	0.927298	0.000909074	0.910777	0.001659	P61129	ZC3H6 KIAA2035 ZC3HDC6	comp133917_c0_seq1	2e-25
Zinc finger CCCH domain-containing protein 6	0.922937	0.00107905	0.975796	3.48e-05	O35218	Cpsf2 Cpsf100 Mcpsf	comp132500_c0_seq1	3e-165
Cleavage and polyadenylation specificity factor subunit 2 (Cleavage and polyadenylation specificity factor 100 kDa subunit) (CPSF 100 kDa subunit)	0.918964	0.00125081	0.928934	0.000850146	Q6KCD5	Nipbl Scc2	comp130563_c0_seq1	7e-80
Nipped-B-like protein (Delangin homolog) (SCC2 homolog)	0.915533	0.00141278	0.877035	0.00423006	Q5RBR8	EIF4H	comp81620_c0_seq1	9e-10
Eukaryotic translation initiation factor 4H (eIF-4H)	0.913597	0.00150988	0.957342	0.00018791	O08740	Polr2j Rpo2-4	comp131995_c0_seq4	2e-59
DNA-directed RNA polymerase II subunit RPB11 (RNA polymerase II subunit B11) (DNA-directed RNA polymerase II subunit J) (RNA polymerase II 13.3 kDa subunit) (RPB14)	0.907136	0.00186525	0.876047	0.00432949	F6UA42	uhrf1	comp122528_c0_seq2	4e-149
E3 ubiquitin-protein ligase UHRF1 (EC 2.3.2.27) (RING-type E3 ubiquitin transferase UHRF1) (Ubiquitin-like PHD and RING finger domain-containing protein 1) (Ubiquitin-like-containing PHD and RING finger domains protein 1)	0.906553	0.0018997	0.952011	0.00026644	P11031	Sub1 Pc4 Rpo2tc1	comp129282_c0_seq1	5e-17
tRNA (guanine-N(7)-)-methyltransferase (EC 2.1.1.33) (Methyltransferase-like protein 1) (tRNA (guanine(46)-N(7))-methyltransferase) (tRNA(m7G46)-methyltransferase)	0.902005	0.00218309	0.851975	0.00723497	Q5R5N8	DIS3L	comp134034_c1_seq1	0
Activated RNA polymerase II transcriptional coactivator p15 (Positive cofactor 4) (PC4) (SUB1 homolog) (Single-stranded DNA-binding protein p9) (p14)	0.901427	0.00222096	0.87031	0.00493666	Q6P2E9	EDC4 HEDLS	comp132680_c0_seq1	8e-82
Enhancer of mRNA-decapping protein 4 (Autoantigen Ge-1) (Autoantigen RCD-8) (Human enhancer of decapping large subunit) (Hedls)	0.890164	0.00304573	0.953957	0.00023568	O88491	Nsd1	comp154284_c0_seq1	6e-27
Histone-lysine N-methyltransferase, H3 lysine-36 and H4 lysine-20 specific (EC 2.1.1.43) (H3-K36-HMTase) (H4-K20-HMTase) (Nuclear receptor-binding SET domain-containing protein 1) (NR-binding SET domain-containing protein)	0.888856	0.00315261	0.881219	0.00382534	A8MW92	PHF20L1 CGI-72	comp130514_c0_seq1	5e-32
PHD finger protein 20-like protein 1	0.885989	0.00339535	0.897629	0.00248039	P29054	gtf2b	comp120924_c0_seq1	1e-119
Transcription initiation factor IIB (EC 2.3.1.48) (General transcription factor TFIIB)	0.885256	0.00345932	0.964974	0.000104621	Q63245	Foxd3 Hfh2	comp112429_c0_seq1	4e-20
Forkhead box protein D3 (HNF3/FH transcription factor genesis) (Hepatocyte nuclear factor 3 forkhead homolog 2) (HFH-2) (Fragment)	0.884921	0.00348879	0.900648	0.00227265	Q6AYT2	Nfe2	comp114624_c0_seq1	7e-18
Transcription factor NF-E2 45 kDa subunit (Leucine zipper protein NF-E2) (Nuclear factor, erythroid-derived 2 45 kDa subunit) (p45 NF-E2)	0.880146	0.0039266	0.924962	0.000997742	A3KN83	SBNO1 MOP3	comp125982_c0_seq1	0
Protein strawberry notch homolog 1 (Monocyte protein 3) (MOP-3)	0.876215	0.00431252	0.923971	0.001037	Q4R6W9	SNAPC1 QtsA-16981	comp131555_c0_seq2	1e-34
snRNA-activating protein complex subunit 1 (SNAPc subunit 1) (Small nuclear RNA-activating complex polypeptide 1) (snRNA-activating protein complex 43 kDa subunit) (SNAPc 43 kDa subunit)	0.874637	0.00447394	0.959132	0.000165461	Q66II8	snrnp70 snrp70 TNeu055c14.1	comp135781_c0_seq1	1e-09
tRNA wybutosine-synthesizing protein 4 (tRNA yW-synthesizing protein 4) (EC 2.1.1.290) (EC 2.3.1.231) (Leucine carboxyl methyltransferase 2) (p21WAF1/CIP1 promoter-interacting protein) (tRNA(Phe) (7-(3-amino-3-(methoxycarbonyl)propyl)wyosine(37)-N)-methoxycarbonyltransferase) (tRNA(Phe) (7-(3-amino-3-carboxypropyl)wyosine(37)-O)-methyltransferase)	0.869751	0.0049985	0.930654	0.000790927	Q8HXB8	RPL29 QccE-11892	comp70222_c1_seq1	7e-24
U1 small nuclear ribonucleoprotein 70 kDa (U1 snRNP 70 kDa) (U1-70K) (snRNP70)	0.86639	0.00538129	0.812002	0.014357	Q9UBU9	NXF1 TAP	comp120519_c2_seq2	3e-54
60S ribosomal protein L29	0.862727	0.00581931	0.881508	0.00379835	Q92005	eef1a ef1a	comp114699_c0_seq1	6e-69
Elongation factor 1-alpha (EF-1-alpha)	0.855827	0.00670511	0.866138	0.00541075	Q3T0B7	RPS27L	comp134499_c0_seq1	5e-24
Nuclear RNA export factor 1 (Tip-associated protein) (Tip-associating protein) (mRNA export factor TAP)	0.841575	0.0087968	0.735169	0.0377005	P25490	YY1 INO80S	comp135683_c0_seq3	8e-88
Transcriptional repressor protein YY1 (Delta transcription factor) (INO80 complex subunit S) (NF-E1) (Yin and yang 1) (YY-1)	0.831934	0.0104224	0.917661	0.00131083	Q501J6	Ddx17	comp129921_c0_seq2	0
40S ribosomal protein S27-like	0.829516	0.0108577	0.915121	0.00143308	P58557	YBEY C21orf57	comp131285_c0_seq1	6e-23
Probable ATP-dependent RNA helicase DDX17 (EC 3.6.4.13) (DEAD box protein 17)	0.827224	0.011281	0.812456	0.0142585	Q8BUZ1	Abra	comp130177_c0_seq1	2e-29
Endoribonuclease YbeY (EC 3.1.-.-)	0.82147	0.0123889	0.810915	0.0145949	Q9BMX5	RPS6	comp108265_c0_seq1	8e-114
Actin-binding Rho-activating protein (Striated muscle activator of Rho-dependent signaling) (STARS)	0.816511	0.0133971	0.917037	0.00134019	Q00577	PURA PUR1	comp121976_c0_seq1	1e-38
Transcriptional activator protein Pur-alpha (Purine-rich single-stranded DNA-binding protein alpha)	0.811637	0.0144366	0.865781	0.00545269	Q5ZIE8	ATF7IP MCAF1 RCJMB04_27g4	comp131955_c0_seq1	6e-24
Activating transcription factor 7-interacting protein 1 (MBD1-containing chromatin-associated factor 1)	0.804614	0.0160217	0.905802	0.00194474	O43143	DHX15 DBP1 DDX15	comp134559_c0_seq4	3e-43
40S ribosomal protein S6	0.801802	0.0166857	0.914486	0.00146481	Q12904	AIMP1 EMAP2 SCYE1	comp135694_c0_seq1	4e-75
Pre-mRNA-splicing factor ATP-dependent RNA helicase DHX15 (EC 3.6.4.13) (ATP-dependent RNA helicase #46) (DEAH box protein 15)	0.801018	0.0168738	0.86353	0.00572143	O35134	Polr1a Rpa1 Rpo1-4	comp128726_c0_seq1	5e-40
DNA-directed RNA polymerase I subunit RPA1 (RNA polymerase I subunit A1) (EC 2.7.7.6) (DNA-directed RNA polymerase I largest subunit) (DNA-directed RNA polymerase I subunit A) (RNA polymerase I 194 kDa subunit) (RPA194)	0.788418	0.0200812	0.827124	0.0112996	Q3UZD5	Prdm6 Gm92 Prism	comp125803_c0_seq1	1e-47
Putative histone-lysine N-methyltransferase PRDM6 (EC 2.1.1.43) (PR domain zinc finger protein 6) (PR domain-containing protein 6) (PR domain-containing protein in smooth muscle)	0.7805	0.0222776	0.758381	0.0291825	Q5BJ41	cnot6	comp118137_c0_seq1	2e-137
CCR4-NOT transcription complex subunit 6 (EC 3.1.13.4) (Cytoplasmic deadenylase)	0.777666	0.0230983	0.79272	0.0189467	P16241	vvl Cf1a CG10037	comp98994_c0_seq1	2e-86
Krueppel-like factor 7 (Ubiquitous krueppel-like factor)	0.709296	0.0488052	0.832994	0.010235	P48508	Gclm Glclr	comp135903_c0_seq1	7e-57
POU domain protein CF1A (Chorion factor 1A) (CF1-A) (Protein drifter) (Ventral veins lacking protein)	0.773614	0.0243042	0.800756	0.016937	Q6DIN3	mbtd1 TTpA012c17.1	comp135083_c0_seq2	1e-19
MBT domain-containing protein 1	0.77356	0.0243204	0.918808	0.00125791	Q7KZ85	SUPT6H KIAA0162 SPT6H	comp125847_c0_seq1	0
Transcription elongation factor SPT6 (hSPT6) (Histone chaperone suppressor of Ty6) (Tat-cotransactivator 2 protein) (Tat-CT2 protein)	0.771041	0.0250897	0.733544	0.0383473	Q02874	H2afy	comp133447_c0_seq1	1e-112
Core histone macro-H2A.1 (Histone macroH2A1) (mH2A1) (H2A.y) (H2A/y)	0.755531	0.0301569	0.897682	0.00247663	O95639	CPSF4 CPSF30 NAR NEB1	comp122604_c0_seq1	2e-111
Cleavage and polyadenylation specificity factor subunit 4 (Cleavage and polyadenylation specificity factor 30 kDa subunit) (CPSF 30 kDa subunit) (NS1 effector domain-binding protein 1) (Neb-1) (No arches homolog)	0.742394	0.0349056	0.811767	0.0144082	Q8R151	Znfx1	comp135350_c1_seq2	7e-55
NFX1-type zinc finger-containing protein 1	0.723235	0.0426075	0.733871	0.0382167	Q2KIG2	WDR5	comp134915_c2_seq1	0
WD repeat-containing protein 5	0.709905	0.0485239	0.791124	0.0193628	O75840	KLF7 UKLF	comp68696_c0_seq1	2e-52
Bromodomain-containing protein 2	0.583006	0.129308	0.60569	0.111517	P24722	tck1	comp131113_c0_seq1	0
Creatine kinase, testis isozyme (EC 2.7.3.2)	-0.615683	0.104149	-0.79872	0.0174328	P27615	Scarb2 Cd36l2 Limpii	comp132379_c0_seq1	3e-88
Aminoacyl tRNA synthase complex-interacting multifunctional protein 1 (Multisynthase complex auxiliary component p43) [Cleaved into: Endothelial monocyte-activating polypeptide 2 (EMAP-2) (Endothelial monocyte-activating polypeptide II) (EMAP-II) (Small inducible cytokine subfamily E member 1)]	0.703074	0.0517373	0.855528	0.00674532	P46778	RPL21	comp62645_c0_seq1	4e-64
Putative Polycomb group protein ASXL3 (Additional sex combs-like protein 3)	0.681597	0.0626556	0.777139	0.023253	Q1PSW8	Trim71 Gm1127 Lin41	comp132322_c1_seq2	4e-17
Hepatocyte nuclear factor 3-beta (HNF-3-beta) (HNF-3B) (Forkhead box protein A2) (Me-HNF3B)	0.487564	0.220365	0.489259	0.218521	P11024	NNT	comp123419_c0_seq1	0
Selenoprotein M (SelM)	0.655684	0.0775113	0.677514	0.0648732	Q8BYR1	Lcmt2 Kiaa0547 Tyw4	comp132508_c0_seq1	1e-36
E3 ubiquitin-protein ligase TRIM71 (EC 2.3.2.27) (Protein lin-41 homolog) (mLin41) (RING-type E3 ubiquitin transferase TRIM71) (Tripartite motif-containing protein 71)	0.655082	0.0778788	0.76834	0.0259308	Q5RC80	RBM39	comp114406_c0_seq1	4e-123
RNA-binding protein 39 (RNA-binding motif protein 39)	0.654517	0.0782245	0.766023	0.0266664	Q6NUB2	cwc15-a	comp124302_c0_seq2	3e-63
Protein CWC15 homolog A	0.650581	0.0806578	0.78377	0.0213533	Q62504	Spen Kiaa0929 Mint Sharp	comp136090_c0_seq1	2e-58
Lysine-specific demethylase 6A (EC 1.14.11.-) (Histone demethylase UTX) (Ubiquitously-transcribed TPR protein on the X chromosome) (Ubiquitously-transcribed X chromosome tetratricopeptide repeat protein)	-0.489932	0.217792	-0.522909	0.183611	O97524	GUSB	comp136470_c0_seq5	0
Beta-glucuronidase (EC 3.2.1.31)	-0.608058	0.109745	-0.642865	0.0855538	Q9QZB7	Actr10 Act11 Actr11 Arp11	comp134573_c0_seq1	3e-121
60S ribosomal protein L21 (Large ribosomal subunit protein eL21)	0.650581	0.0806578	0.78377	0.0213533	Q2KIH4	RRS1	comp121122_c0_seq1	2e-67
Rabphilin-3A (Exophilin-1)	0.648743	0.0818084	0.669936	0.0691103	P10160	EIF5A	comp132484_c0_seq1	9e-72
Cytoplasmic tRNA 2-thiolation protein 2-A	0.627392	0.0958809	0.698333	0.0540404	O15381	NVL NVL2	comp135534_c0_seq1	0
Msx2-interacting protein (SMART/HDAC1-associated repressor protein) (SPEN homolog)	0.622	0.0996395	0.563355	0.14592	Q52KN9	cwc22	comp95669_c0_seq1	2e-85
Pre-mRNA-splicing factor CWC22 homolog (Nucampholin homolog)	0.602755	0.113735	0.765853	0.0267207	Q5TJG6	BRD2	comp134662_c0_seq1	3e-123
Nuclear valosin-containing protein-like (NVLp) (Nuclear VCP-like protein)	0.5937	0.120736	0.668475	0.0699459	Q6DRH5	nop10 nola3	comp114390_c0_seq1	4e-26
Histone-lysine N-methyltransferase 2A (Lysine N-methyltransferase 2A) (EC 2.1.1.43) (ALL-1) (CXXC-type zinc finger protein 7) (Myeloid/lymphoid or mixed-lineage leukemia) (Myeloid/lymphoid or mixed-lineage leukemia protein 1) (Trithorax-like protein) (Zinc finger protein HRX) [Cleaved into: MLL cleavage product N320 (N-terminal cleavage product of 320 kDa) (p320); MLL cleavage product C180 (C-ter…	-0.637343	0.0891613	-0.671245	0.0683672	P00919	CA2	comp117442_c0_seq1	9e-74
E3 SUMO-protein ligase PIAS2 (EC 2.3.2.-) (Androgen receptor-interacting protein 3) (ARIP3) (DAB2-interacting protein) (DIP) (E3 SUMO-protein transferase PIAS2) (Msx-interacting zinc finger protein) (Miz1) (PIAS-NY protein) (Protein inhibitor of activated STAT x) (Protein inhibitor of activated STAT2)	0.571452	0.13894	0.666541	0.0710603	O42097	foxa2 hnf3b	comp119417_c0_seq1	6e-74
Something about silencing protein 10 (Charged amino acid-rich leucine zipper 1) (Disrupter of silencing SAS10) (UTP3 homolog)	0.417711	0.303127	0.407476	0.31634	P61217	POLR2F POLRF	comp123685_c0_seq1	3e-45
H/ACA ribonucleoprotein complex subunit 3 (Nucleolar protein 10) (Nucleolar protein family A member 3) (snoRNP protein NOP10)	0.410694	0.312157	0.476102	0.233035	Q149F1	Rpusd2	comp129539_c0_seq1	2e-139
DNA-directed RNA polymerases I, II, and III subunit RPABC2 (RNA polymerases I, II, and III subunit ABC2) (DNA-directed RNA polymerase II subunit F) (RPB6 homolog)	0.287684	0.489615	0.440884	0.274219	Q9BYK8	HELZ2 KIAA1769 PRIC285	comp137130_c1_seq1	2e-102
Helicase with zinc finger domain 2 (ATP-dependent helicase PRIC285) (Helicase with zinc finger 2, transcriptional coactivator) (PPAR-alpha-interacting complex protein 285) (PPAR-gamma DNA-binding domain-interacting protein 1) (PDIP1) (PPAR-gamma DBD-interacting protein 1) (Peroxisomal proliferator-activated receptor A-interacting complex 285 kDa protein) (EC 3.6.4.-)	-0.365448	0.373349	-0.442064	0.272785	O15550	KDM6A UTX	comp136437_c0_seq1	0
Helicase with zinc finger domain 2 (ATP-dependent helicase PRIC285) (Helicase with zinc finger 2, transcriptional coactivator) (PPAR-alpha-interacting complex protein 285) (PPAR-gamma DNA-binding domain-interacting protein 1) (PDIP1) (PPAR-gamma DBD-interacting protein 1) (Peroxisomal proliferator-activated receptor A-interacting complex 285 kDa protein) (EC 3.6.4.-)	-0.560374	0.148537	-0.673076	0.0673356	P51531	SMARCA2 BAF190B BRM SNF2A SNF2L2	comp136391_c0_seq2	2e-82
Probable global transcription activator SNF2L2 (EC 3.6.4.-) (ATP-dependent helicase SMARCA2) (BRG1-associated factor 190B) (BAF190B) (Protein brahma homolog) (hBRM) (SNF2-alpha) (SWI/SNF-related matrix-associated actin-dependent regulator of chromatin subfamily A member 2)	-0.565255	0.144265	-0.767942	0.0260564	Q9BXP5	SRRT ARS2 ASR2	comp119013_c0_seq1	7e-109
RNA pseudouridylate synthase domain-containing protein 2	-0.589638	0.123953	-0.727699	0.0407291	O43709	BUD23 MERM1 WBSCR22 HUSSY-03 PP3381	comp135668_c0_seq1	4e-89
Carbonic anhydrase 2 (EC 4.2.1.1) (Carbonate dehydratase II) (Carbonic anhydrase II) (CA-II)	-0.599737	0.116042	-0.765109	0.0269598	Q9DBI0	Tmprss6	comp94006_c0_seq1	7e-59
Actin-related protein 10 (Actin-related protein 11)	-0.607787	0.109947	-0.78996	0.0196698	Q9BYK8	HELZ2 KIAA1769 PRIC285	comp137130_c1_seq2	6e-29
Serrate RNA effector molecule homolog (Arsenite-resistance protein 2)	-0.60937	0.10877	-0.764023	0.0273115	Q7L014	DDX46 KIAA0801	comp134000_c0_seq1	0
NAD(P) transhydrogenase, mitochondrial (EC 1.6.1.2) (Nicotinamide nucleotide transhydrogenase) (Pyridine nucleotide transhydrogenase)	-0.611778	0.106994	-0.728239	0.0405053	Q6AXX4	Utp3 Crlz1 Sas10	comp125172_c0_seq1	4e-30
Lysosome membrane protein 2 (85 kDa lysosomal membrane sialoglycoprotein) (LGP85) (CD36 antigen-like 2) (Lysosome membrane protein II) (LIMP II) (Scavenger receptor class B member 2) (CD antigen CD36)	-0.615608	0.104203	-0.723355	0.0425563	O75928	PIAS2 PIASX	comp129800_c0_seq1	1e-125
Glutamate--cysteine ligase regulatory subunit (GCS light chain) (Gamma-ECS regulatory subunit) (Gamma-glutamylcysteine synthetase regulatory subunit) (Glutamate--cysteine ligase modifier subunit)	-0.617992	0.102488	-0.782989	0.0215717	Q9C0F0	ASXL3 KIAA1713	comp118249_c0_seq1	1e-43
Probable ATP-dependent RNA helicase DDX46 (EC 3.6.4.13) (DEAD box protein 46) (PRP5 homolog)	-0.62785	0.0955654	-0.686405	0.0601025	Q99LB0	Dnttip1 Tdif1	comp130591_c0_seq1	4e-53
Deoxynucleotidyltransferase terminal-interacting protein 1 (Terminal deoxynucleotidyltransferase-interacting factor 1) (TdIF1) (TdT-interacting factor 1)	-0.633605	0.0916522	-0.728776	0.0402838	Q03164	KMT2A ALL1 CXXC7 HRX HTRX MLL MLL1 TRX1	comp122385_c1_seq1	5e-96
Probable 18S rRNA (guanine-N(7))-methyltransferase (EC 2.1.1.-) (Bud site selection protein 23 homolog) (Metastasis-related methyltransferase 1) (Williams-Beuren syndrome chromosomal region 22 protein) (rRNA methyltransferase and ribosome maturation factor)	-0.639318	0.0878613	-0.772348	0.0246887	Q0BUQ2	tuf GbCGDNIH1_0552	comp130952_c0_seq1	0
Transmembrane protease serine 6 (EC 3.4.21.-) (Matriptase-2)	-0.639929	0.0874614	-0.733161	0.0385006	P10589	NR2F1 EAR3 ERBAL3 TFCOUP1	comp104296_c1_seq1	3e-21
Splicing factor, suppressor of white-apricot homolog (Splicing factor, arginine/serine-rich 8) (Suppressor of white apricot protein homolog)	-0.651498	0.080087	-0.785608	0.0208443	Q08B12	ctu2-a ncs2-a	comp129337_c0_seq1	1e-100
Elongation factor Tu (EF-Tu)	-0.653519	0.0788371	-0.719325	0.0442946	Q4PM12	RpL36	comp73508_c0_seq1	9e-39
COUP transcription factor 1 (COUP-TF1) (COUP transcription factor I) (COUP-TF I) (Nuclear receptor subfamily 2 group F member 1) (V-erbA-related protein 3) (EAR-3)	-0.656926	0.0767568	-0.760602	0.0284368	Q9NZN8	CNOT2 CDC36 NOT2 HSPC131 MSTP046	comp110504_c0_seq1	2e-118
CCR4-NOT transcription complex subunit 2 (CCR4-associated factor 2)	-0.662984	0.0731375	-0.623458	0.0986153	Q9WUU6	Hnf4g Nr2a2	comp128825_c1_seq1	7e-143
Protein HIRA	-0.891979	0.00290135	-0.924198	0.00102791	P47708	Rph3a	comp131982_c1_seq1	6e-22
60S ribosomal protein L36	-0.669812	0.0691811	-0.569624	0.140499	A4FV84	MRTO4	comp127744_c0_seq4	6e-100
mRNA turnover protein 4 homolog (Ribosome assembly factor MRTO4)	-0.677106	0.0650973	-0.791472	0.0192715	P62986	Uba52 Ubcep2	comp66799_c0_seq1	6e-82
Hepatocyte nuclear factor 4-gamma (HNF-4-gamma) (Nuclear receptor subfamily 2 group A member 2)	-0.681115	0.0629149	-0.847945	0.00781716	Q3ZC01	CNOT7 CAF1	comp130991_c0_seq1	2e-136
CCR4-NOT transcription complex subunit 7 (EC 3.1.13.4) (CCR4-associated factor 1) (CAF-1)	-0.710383	0.0483038	-0.868889	0.00509497	P0DPD5	ZNF723	comp133922_c1_seq1	2e-32
Zinc finger protein 723	-0.733021	0.0385569	-0.738667	0.0363312	Q1EA11	CCR4 CIMG_00602	comp83982_c0_seq1	1e-06
Glucose-repressible alcohol dehydrogenase transcriptional effector (EC 3.1.13.4) (Carbon catabolite repressor protein 4) (Cytoplasmic deadenylase)	-0.733093	0.038528	-0.744324	0.0341814	Q9PTX2	cirbp	comp124343_c0_seq1	2e-16
Cold-inducible RNA-binding protein (BFCIRP) (Glycine-rich RNA-binding protein CIRP)	-0.733794	0.0382473	-0.672771	0.0675066	Q4VGL6	Rc3h1 Gm551 Kiaa2025	comp120921_c0_seq1	3e-149
Roquin-1 (Roquin) (EC 2.3.2.27) (Protein Sanroque) (RING finger and C3H zinc finger protein 1) (RING finger and CCCH-type zinc finger domain-containing protein 1)	-0.745975	0.0335692	-0.78436	0.021189	Q8K2Y0	Rnf219	comp122565_c0_seq2	2e-23
RING finger protein 219	-0.760174	0.0285798	-0.74822	0.0327473	P61259	SOX14 QtrA-14282	comp109851_c0_seq1	1e-32
DIS3-like exonuclease 1 (EC 3.1.13.-)	0.886277	0.00337048	0.785454	0.0208867	Q8WWX9	SELENOM SELM	comp133786_c0_seq1	5e-13
Transcription factor SOX-14	-0.772978	0.024497	-0.869975	0.00497373	Q9GZQ3	COMMD5 HT002	comp136595_c0_seq2	1e-52
COMM domain-containing protein 5 (Hypertension-related calcium-regulated gene protein) (HCaRG)	-0.778993	0.0227117	-0.897785	0.00246933	Q5U2Z0	Znf367 Zfp367	comp119043_c0_seq1	2e-43
Ubiquitin-60S ribosomal protein L40 (Ubiquitin A-52 residue ribosomal protein fusion product 1) [Cleaved into: Ubiquitin; 60S ribosomal protein L40 (CEP52)]	-0.779443	0.0225815	-0.789251	0.0198581	O60841	EIF5B IF2 KIAA0741	comp130649_c0_seq1	0
Zinc finger protein 367	-0.79625	0.0180464	-0.872194	0.00473157	Q9VHI4	Sf3b5 CG11985	comp124177_c0_seq1	3e-43
Eukaryotic translation initiation factor 5B (eIF-5B) (EC 3.6.5.3) (Translation initiation factor IF-2)	-0.796978	0.0178641	-0.791583	0.0192426	Q9ET55	Noct Ccr4 Ccrn4l Noc	comp135707_c0_seq3	4e-39
Splicing factor 3B subunit 5 (Pre-mRNA-splicing factor SF3b 10 kDa subunit)	-0.79787	0.0176425	-0.836418	0.00964451	Q3T042	NOB1	comp122799_c0_seq2	9e-39
RNA-binding protein NOB1	-0.797951	0.0176223	-0.863918	0.00567458	Q5QJE6	DNTTIP2 ERBP TDIF2	comp119972_c0_seq2	1e-40
Nocturnin (EC 3.1.13.4) (Carbon catabolite repression 4-like protein) (Circadian deadenylase NOC)	-0.797951	0.0176223	-0.863918	0.00567458	Q9BY77	POLDIP3 KIAA1649 PDIP46	comp135509_c0_seq1	5e-17
Deoxynucleotidyltransferase terminal-interacting protein 2 (Estrogen receptor-binding protein) (LPTS-interacting protein 2) (LPTS-RP2) (Terminal deoxynucleotidyltransferase-interacting factor 2) (TdIF2) (TdT-interacting factor 2)	-0.798457	0.0174976	-0.925611	0.000972563	Q4V7L5	med9	comp127919_c0_seq1	9e-09
Ribosome biogenesis regulatory protein homolog	0.64038	0.0871662	0.754451	0.0305314	Q12872	SFSWAP SFRS8 SWAP	comp125698_c0_seq1	8e-18
Mediator of RNA polymerase II transcription subunit 9 (Mediator complex subunit 9)	-0.803343	0.0163197	-0.78499	0.0210145	Q5IS79	ATOH1	comp110905_c0_seq1	5e-11
Protein atonal homolog 1	-0.814908	0.0137335	-0.783916	0.0213125	Q5BKF8	ccnl2	comp119976_c0_seq1	3e-52
Polymerase delta-interacting protein 3 (46 kDa DNA polymerase delta interaction protein) (p46) (S6K1 Aly/REF-like target) (SKAR)	-0.815831	0.0135391	-0.669206	0.069527	Q5VTE6	ANGEL2 KIAA0759L	comp127059_c0_seq1	1e-59
Protein angel homolog 2	-0.818921	0.0129008	-0.913329	0.0015237	Q9D2Q2	Trmt44 Mettl19	comp119628_c0_seq2	3e-12
Cyclin-L2	-0.834755	0.00992855	-0.838158	0.00935294	P31314	TLX1 HOX11 TCL3	comp70824_c0_seq1	9e-12
T-cell leukemia homeobox protein 1 (Homeobox protein Hox-11) (Proto-oncogene TCL-3) (T-cell leukemia/lymphoma protein 3)	-0.842298	0.00868202	-0.727467	0.0408254	Q91770	not2	comp128161_c0_seq1	4e-19
Homeobox protein not2 (Xnot-2) (Xnot2)	-0.845826	0.00813493	-0.942945	0.000444691	Q8QFR2	hira hira-a	comp136492_c1_seq1	3e-82
Probable tRNA (uracil-O(2)-)-methyltransferase (EC 2.1.1.211) (Methyltransferase-like protein 19)	-0.8804	0.00390247	-0.914075	0.00148553	Q9P281	BAHCC1 BAHD2 KIAA1447	comp132748_c0_seq1	9e-39
Eukaryotic translation initiation factor 5A-1 (eIF-5A-1) (eIF-5A1) (Eukaryotic initiation factor 5A isoform 1) (eIF-5A) (eIF-4D)	-0.897717	0.00247414	-0.8863	0.00336843	Q6GP17	kmt5b-a suv420h1-a	comp127209_c0_seq1	5e-108
BAH and coiled-coil domain-containing protein 1 (Bromo adjacent homology domain-containing protein 2) (BAH domain-containing protein 2)	-0.942845	0.000446981	-0.932826	0.000720119	P42128	Foxk1 Mnf	comp135923_c0_seq1	2e-74
Histone-lysine N-methyltransferase KMT5B-A (EC 2.1.1.43) (Lysine-specific methyltransferase 5B-A) (Suppressor of variegation 4-20 homolog 1-A) (Su(var)4-20 homolog 1-A) (Suv4-20h1-A)	-0.95366	0.000240212	-0.937213	0.000590025	P78412	IRX6 IRX7 IRXB3	comp127432_c0_seq2	2e-39
Forkhead box protein K1 (Myocyte nuclear factor) (MNF)	-0.956649	0.000197108	-0.960725	0.000147026	Q9NUP7	TRMT13 CCDC76	comp133256_c0_seq2	1e-77
Cytoskeletal
Unconventional myosin-VIIa	1	0	0.944915	0.000400799	Q13402	MYO7A USH1B	comp113360_c0_seq1	7e-09
Fermitin family homolog 2 (Kindlin-2) (Mitogen-inducible gene 2 protein) (MIG-2) (Pleckstrin homology domain-containing family C member 1) (PH domain-containing family C member 1)	0.996051	1.53e-07	0.924523	0.00101501	Q96AC1	FERMT2 KIND2 MIG2 PLEKHC1	comp123954_c0_seq1	2e-174
Tubulin monoglycylase TTLL3 (EC 6.3.2.-) (Tubulin--tyrosine ligase-like protein 3)	0.991063	1.77e-06	0.921327	0.00114666	Q1ECV4	ttll3 zgc:136840	comp105588_c0_seq1	8e-08
Dynein light chain 2, cytoplasmic (8 kDa dynein light chain b) (DLC8) (DLC8b) (Dynein light chain LC8-type 2)	0.989119	3.19e-06	0.896949	0.00252879	Q9D0M5	Dynll2 Dlc2	comp103248_c0_seq1	2e-17
Transgelin (Smooth muscle protein 22-alpha) (SM22-alpha)	0.963425	0.000118989	0.894283	0.00272449	P19966	TAGLN SM22	comp131155_c0_seq1	8e-37
Profilin	0.908202	0.00180322	0.946611	0.000365381	Q9U0E6		comp123606_c0_seq1	3e-51
Actin (Fragment)	0.873187	0.00462578	0.926551	0.000936848	Q24733		comp135730_c1_seq1	9e-07
FERM domain-containing protein 5	0.871625	0.00479289	0.92659	0.000935365	Q6P5H6	Frmd5	comp114354_c0_seq1	2e-109
Tyrosine-protein phosphatase Lar (EC 3.1.3.48) (Protein-tyrosine-phosphate phosphohydrolase) (dLAR)	0.863831	0.00568499	0.823733	0.0119454	P16621	Lar CG10443	comp114811_c0_seq1	3e-06
Mucin-like protein (Fragment)	0.810468	0.0146932	0.854827	0.00684021	B3EWY9		comp119519_c0_seq1	4e-44
Sodium-dependent phosphate transport protein 2B (Sodium-phosphate transport protein 2B) (Na(+)-dependent phosphate cotransporter 2B) (Sodium/phosphate cotransporter 2B) (Na(+)/Pi cotransporter 2B) (NaPi-2b) (Solute carrier family 34 member 2)	0.752604	0.0311782	0.740366	0.035677	Q9DBP0	Slc34a2 Npt2b	comp128809_c0_seq1	3e-144
Dystroglycan (Dystrophin-associated glycoprotein 1) [Cleaved into: Alpha-dystroglycan (Alpha-DG); Beta-dystroglycan (Beta-DG)]	0.750388	0.0319654	0.775822	0.0236422	Q29243	DAG1	comp130080_c0_seq1	2e-16
C2 domain-containing protein 3	0.717221	0.045219	0.868123	0.00518167	A0JM13	c2cd3	comp128419_c0_seq3	2e-21
Tubulin alpha-3 chain (Fragments)	0.714103	0.0466102	0.70345	0.051557	P86234		comp114542_c1_seq2	2e-21
MICAL-like protein 2 (Junctional Rab13-binding protein) (Molecule interacting with CasL-like 2) (MICAL-L2)	0.698123	0.0541437	0.787627	0.0202942	Q8IY33	MICALL2 JRAB	comp51652_c0_seq1	2e-14
Sushi, von Willebrand factor type A, EGF and pentraxin domain-containing protein 1 (Polydom)	0.659372	0.0752834	0.804497	0.0160489	A2AVA0	Svep1	comp129367_c0_seq1	6e-19
Thymosin beta-12	0.587925	0.125324	0.551991	0.156035	P33248		comp47861_c0_seq1	4e-13
Splicing factor, suppressor of white-apricot homolog (Splicing factor, arginine/serine-rich 8) (Suppressor of white apricot protein homolog)	0.877258	0.0042078	0.83818	0.00934939	Q12872	SFSWAP SFRS8 SWAP	comp125698_c0_seq1	8e-18
Myosin-2 essential light chain	0.575811	0.135261	0.659445	0.0752393	Q9XVI9	mlc-5 T12D8.6	comp128297_c0_seq1	4e-32
Alpha-adducin (Erythrocyte adducin subunit alpha)	0.562469	0.146695	0.609778	0.108468	Q63028	Add1	comp125186_c0_seq2	9e-100
Tubulin-specific chaperone cofactor E-like protein (Leucine-rich repeat-containing protein 35)	0.390512	0.338826	0.491652	0.215934	Q5PQJ7	Tbcel Lrrc35	comp132721_c0_seq1	4e-78
Protein-associating with the carboxyl-terminal domain of ezrin (Ezrin-binding protein PACE-1) (SCY1-like protein 3)	-0.501298	0.205664	-0.662464	0.0734445	Q8IZE3	SCYL3 PACE1	comp130867_c0_seq1	2e-72
Switch-associated protein 70 (SWAP-70)	-0.569982	0.140194	-0.708393	0.0492247	Q6A028	Swap70 Kiaa0640	comp135488_c0_seq3	5e-25
Sushi, von Willebrand factor type A, EGF and pentraxin domain-containing protein 1 (Polydom)	-0.570788	0.139505	-0.556545	0.151937	A2AVA0	Svep1	comp136350_c1_seq4	3e-55
Tryptophan--tRNA ligase, cytoplasmic (EC 6.1.1.2) (Interferon-induced protein 53) (IFP53) (Tryptophanyl-tRNA synthetase) (TrpRS) (hWRS) [Cleaved into: T1-TrpRS; T2-TrpRS]	-0.576447	0.134729	-0.738721	0.0363102	P23381	WARS IFI53 WRS	comp132419_c0_seq1	0
Actin-related protein 2/3 complex subunit 3 (Arp2/3 complex 21 kDa subunit) (p21-ARC)	-0.647519	0.0825802	-0.575127	0.135835	O15145	ARPC3 ARC21	comp77265_c0_seq1	2e-79
Cilia- and flagella-associated protein 221 (Primary ciliary dyskinesia protein 1)	-0.681723	0.0625881	-0.728092	0.0405661	Q4G0U5	CFAP221 PCDP1	comp135739_c0_seq1	1e-68
Protocadherin-like protein	-0.70113	0.0526742	-0.780939	0.022152	B8V7Q1		comp136341_c1_seq1	0
Dynein regulatory complex subunit 5 (T-complex-associated testis-expressed protein 1) (Tcte-1)	-0.708343	0.0492477	-0.758404	0.029175	Q5JU00	TCTE1 DRC5	comp123079_c0_seq1	6e-163
Villin-1	-0.724315	0.0421484	-0.702625	0.0519528	P02640	VIL1 VIL	comp136995_c0_seq1	2e-147
Dynein light chain 2, cytoplasmic (8 kDa dynein light chain b) (DLC8) (DLC8b) (Dynein light chain LC8-type 2)	-0.730479	0.0395853	-0.891207	0.00296217	Q9D0M5	Dynll2 Dlc2	comp99614_c0_seq1	3e-54
Dynein heavy chain 1, axonemal (Axonemal beta dynein heavy chain 1) (Ciliary dynein heavy chain 1) (Heat shock regulated protein 1) (HSRF-1) (hDHC7)	-0.737695	0.0367085	-0.750547	0.0319085	Q9P2D7	DNAH1 DHC7 DNAHC1 KIAA1410	comp205411_c0_seq1	2e-96
Actin-related protein 2-B (Actin-like protein 2-B)	-0.742566	0.0348408	-0.815796	0.0135465	Q7ZXV3	actr2-b arp2-b	comp130586_c0_seq1	0
Tubulin-specific chaperone E (Tubulin-folding cofactor E)	-0.742913	0.0347101	-0.849485	0.00759131	Q15813	TBCE	comp131626_c0_seq5	6e-77
Creatine kinase, testis isozyme (EC 2.7.3.2)	-0.917017	0.00134114	-0.86578	0.00545272	P24722	tck1	comp131113_c0_seq1	0
EGF-like repeat and discoidin I-like domain-containing protein 3 (Developmentally-regulated endothelial cell locus 1 protein) (Integrin-binding protein DEL1)	-0.760677	0.028412	-0.878039	0.00413056	O35474	Edil3 Del1	comp135067_c1_seq2	4e-31
Dynein heavy chain 7, axonemal (Axonemal beta dynein heavy chain 7) (Ciliary dynein heavy chain 7) (Dynein heavy chain-like protein 2) (hDHC2)	-0.776027	0.0235814	-0.786946	0.0204787	Q8WXX0	DNAH7 KIAA0944	comp118357_c0_seq1	0
Adenylyl cyclase-associated protein 2 (CAP 2)	-0.797951	0.0176223	-0.863918	0.00567458	Q5R5X8	CAP2	comp128031_c1_seq1	5e-39
Striatin-interacting protein 1 homolog	-0.798867	0.0173967	-0.675257	0.0661184	Q803T2	strip1 fam40a	comp125479_c0_seq1	2e-166
Rab11 family-interacting protein 3 (FIP3-Rab11) (Rab11-FIP3) (Arfophilin-1) (EF hands-containing Rab-interacting protein) (Eferin) (MU-MB-17.148)	-0.800257	0.0170576	-0.75382	0.0307514	O75154	RAB11FIP3 ARFO1 KIAA0665	comp135174_c0_seq1	1e-19
SH3 and PX domain-containing protein 2B (Factor for adipocyte differentiation 49) (Tyrosine kinase substrate with four SH3 domains)	-0.836662	0.00960341	-0.836983	0.00954925	A2AAY5	Sh3pxd2b Fad49 Tks4	comp115228_c0_seq1	3e-15
Cilia- and flagella-associated protein 46 (Tetratricopeptide repeat protein 40)	-0.838658	0.00927028	-0.930907	0.000782444	Q8IYW2	CFAP46 C10orf123 C10orf124 C10orf92 C10orf93 TTC40	comp134208_c0_seq2	1e-32
Protocadherin Fat 4 (hFat4) (Cadherin family member 14) (FAT tumor suppressor homolog 4) (Fat-like cadherin protein FAT-J)	-0.919299	0.00123569	-0.922816	0.00108402	Q6V0I7	FAT4 CDHF14 FATJ Nbla00548	comp124458_c0_seq1	3e-13
TOG array regulator of axonemal microtubules protein 1 (Crescerin-1) (Protein FAM179B)	-0.945723	0.000383656	-0.921452	0.00114132	Q6A070	Togaram1 Fam179b Kiaa0423	comp125118_c0_seq1	3e-100
Dynein heavy chain 6, axonemal (Axonemal beta dynein heavy chain 6) (Ciliary dynein heavy chain 6)	-0.949947	0.000301844	-0.878025	0.00413187	Q9C0G6	DNAH6 DNAHC6 DNHL1 HL2 KIAA1697	comp118182_c0_seq1	0
Actin-related protein 10 (Actin-related protein 11)	-0.961034	0.000143619	-0.951071	0.000282208	Q9QZB7	Actr10 Act11 Actr11 Arp11	comp134573_c0_seq1	3e-121
Cell Signaling
Serine/threonine-protein phosphatase 6 regulatory ankyrin repeat subunit B (PP6-ARS-B) (Serine/threonine-protein phosphatase 6 regulatory subunit ARS-B) (Ankyrin repeat domain-containing protein 44)	0.947645	0.000344831	0.950174	0.000297803	Q5F478	ANKRD44 RCJMB04_2g14	comp125192_c0_seq1	9e-27
QRFP-like peptide receptor	0.925434	0.0009794	0.89574	0.00261639	C3ZQF9	QRFPR BRAFLDRAFT_74637	comp127445_c0_seq1	7e-10
cGMP-dependent protein kinase 1 (cGK 1) (cGK1) (EC 2.7.11.12) (cGMP-dependent protein kinase I) (cGKI)	0.911479	0.00162103	0.934127	0.000679755	P0C605	Prkg1 Prkg1b Prkgr1a Prkgr1b	comp107094_c1_seq1	2e-37
Pleckstrin homology domain-containing family G member 7 (PH domain-containing family G member 7)	0.896117	0.00258882	0.828023	0.0111324	Q6ZR37	PLEKHG7	comp112871_c0_seq1	3e-56
5-hydroxytryptamine receptor 7 (5-HT-7) (5-HT7) (5-HT-X) (Serotonin receptor 7)	0.883756	0.00359251	0.837136	0.00952362	P34969	HTR7	comp117707_c1_seq1	2e-07
SH3 domain-binding protein 2 (3BP-2)	0.880838	0.00386109	0.906254	0.00191758	Q06649	Sh3bp2 3bp2	comp98788_c0_seq1	4e-14
RYamide receptor (Neuropeptide Y-like receptor) (NPY-R)	0.856714	0.0065868	0.855614	0.00673383	P25931	RYa-R NepYr CG5811	comp128086_c0_seq1	2e-24
Tetraspanin-31 (Tspan-31) (Sarcoma-amplified sequence)	0.852761	0.0071248	0.920387	0.00118737	Q12999	TSPAN31 SAS	comp131720_c0_seq1	4e-59
Receptor-type tyrosine-protein phosphatase delta (Protein-tyrosine phosphatase delta) (R-PTP-delta) (EC 3.1.3.48)	0.845529	0.00818009	0.745244	0.0338391	P23468	PTPRD	comp136894_c0_seq1	4e-132
14-3-3 protein zeta	0.830418	0.0106941	0.885905	0.00340266	Q2F637	14-3-3zeta	comp131982_c0_seq1	7e-97
Tyrosine-protein kinase transforming protein Fps (EC 2.7.10.2)	0.821234	0.0124358	0.784055	0.0212738	P00541	V-FPS	comp131701_c0_seq1	1e-21
Glycoprotein hormone beta-5 (Thyrostimulin subunit beta)	0.810343	0.0147208	0.69753	0.0544367	Q812B2	Gphb5 Gpb5 Zlut1	comp108693_c0_seq1	4e-10
Serine/threonine-protein phosphatase 2A 56 kDa regulatory subunit alpha isoform (PP2A B subunit isoform B'-alpha) (PP2A B subunit isoform B56-alpha) (PP2A B subunit isoform PR61-alpha) (PR61alpha) (PP2A B subunit isoform R5-alpha)	0.794811	0.0184103	0.790946	0.0194094	Q6PD03	Ppp2r5a	comp76072_c0_seq1	0
COP9 signalosome complex subunit 7a (SGN7a) (Signalosome subunit 7a) (JAB1-containing signalosome subunit 7a)	0.777074	0.0232722	0.765207	0.0269285	Q5R762	COPS7A CSN7A	comp132487_c0_seq1	8e-71
Ras-like protein RAS2	0.773614	0.0243042	0.800756	0.016937	P38976	RAS2	comp125687_c0_seq1	1e-86
Striated muscle preferentially expressed protein kinase (EC 2.7.11.1)	0.748204	0.0327529	0.847331	0.00790846	Q696W0	speg apeg1	comp133683_c2_seq3	4e-43
Rho GTPase-activating protein 35 (GAP-associated protein p190) (Glucocorticoid receptor DNA-binding factor 1)	0.715043	0.0461882	0.744206	0.0342254	P81128	Arhgap35 Grlf1 P190A p190ARHOGAP	comp123471_c0_seq1	4e-34
Ras-related and estrogen-regulated growth inhibitor	0.708828	0.0490222	0.832688	0.0102889	Q96A58	RERG	comp127965_c1_seq1	2e-27
CD63 antigen (CD antigen CD63)	0.689483	0.0585015	0.802305	0.0165655	P41731	Cd63	comp130721_c0_seq1	1e-20
Tyrosine kinase receptor Cad96Ca (EC 2.7.10.1) (Cadherin-96Ca) (Tyrosine kinase receptor HD-14)	0.645869	0.0836273	0.758936	0.0289951	Q9VBW3	Cad96Ca HD-14 CG10244	comp136843_c0_seq2	7e-90
GTP-binding protein Rit2 (Ras-like protein expressed in neurons) (Ras-like without CAAX protein 2)	0.524222	0.182314	0.723025	0.0426968	P70425	Rit2 Rin Roc2	comp130230_c0_seq1	1e-39
COP9 signalosome complex subunit 8 (Signalosome subunit 8)	-0.495976	0.211299	-0.659709	0.0750813	Q7ZUZ0	cops8 zgc:56319	comp117433_c0_seq1	2e-52
Ras-like GTP-binding protein RHO	-0.628981	0.0947887	-0.770869	0.0251428	P01122	RHO	comp129023_c0_seq1	2e-23
Zinc finger protein 106 (Zfp-106) (Zinc finger protein 474)	-0.654506	0.0782313	-0.682306	0.0622754	Q9H2Y7	ZNF106 SH3BP3 ZFP106 ZNF474	comp136587_c0_seq1	8e-94
Leucine-rich repeat protein soc-2 homolog	-0.681115	0.0629149	-0.847945	0.00781716	A7SFP1	v1g189306	comp137015_c1_seq1	2e-142
Adenosine deaminase (EC 3.5.4.4) (Adenosine aminohydrolase)	-0.687136	0.0597202	-0.842693	0.00861964	Q63ZU0	ada	comp122972_c0_seq1	2e-95
Ras-like GTP-binding protein RHO	-0.71207	0.0475315	-0.860394	0.00610987	P01122	RHO	comp131036_c0_seq1	1e-25
Transforming protein p29 [Cleaved into: Transforming protein p21]	-0.719416	0.0442549	-0.794995	0.0183634	P01115	H-RAS	comp128490_c0_seq1	3e-88
Endothelin-converting enzyme 1 (ECE-1) (EC 3.4.24.71)	-0.764836	0.0270479	-0.900404	0.00228899	P42893	Ece1	comp81350_c0_seq1	8e-09
Fibroblast growth factor receptor 4 (FGFR-4) (EC 2.7.10.1) (CD antigen CD334)	-0.802126	0.0166082	-0.922257	0.00110725	P22455	FGFR4 JTK2 TKF	comp136843_c0_seq8	2e-17
14-3-3 protein eta	-0.811544	0.0144569	-0.715193	0.046121	P68510	Ywhah	comp105377_c0_seq1	1e-22
14-3-3 protein beta/alpha [Cleaved into: 14-3-3 protein beta/alpha, N-terminally processed]	-0.861152	0.00601453	-0.901385	0.00222371	Q4R572	YWHAB QccE-16215	comp67667_c0_seq1	5e-95
Guanine nucleotide-binding protein G(I)/G(S)/G(O) subunit gamma-11	-0.86966	0.00500863	-0.853753	0.00698726	P61954	Gng11 Gngt11	comp123718_c0_seq1	8e-09
Prolactin-releasing peptide receptor (PrRP receptor) (PrRPR) (G-protein coupled receptor 10)	-0.874205	0.00451886	-0.890281	0.0030363	Q6VMN6	Prlhr Gm339 Gpr10	comp125768_c0_seq1	2e-12
Rho guanine nucleotide exchange factor 17 (164 kDa Rho-specific guanine-nucleotide exchange factor) (p164-RhoGEF) (p164RhoGEF) (Tumor endothelial marker 4)	-0.895002	0.00267077	-0.88174	0.00377674	Q96PE2	ARHGEF17 KIAA0337 TEM4	comp131350_c0_seq1	2e-120
Retinal rod rhodopsin-sensitive cGMP 3',5'-cyclic phosphodiesterase subunit delta (GMP-PDE delta)	-0.895231	0.0026538	-0.900533	0.00228035	Q9XT54	PDE6D	comp130845_c0_seq1	2e-82
Proto-oncogene tyrosine-protein kinase receptor Ret (EC 2.7.10.1) [Cleaved into: Soluble RET kinase fragment; Extracellular cell-membrane anchored RET cadherin 120 kDa fragment]	-0.900085	0.0023105	-0.886874	0.00331917	G3V9H8	Ret	comp135215_c0_seq1	1e-60
Developmental
Gamma-secretase subunit PEN-2 (Presenilin enhancer protein 2 homolog)	0.965156	0.00010302	0.941707	0.000473816	Q8JHF0	psenen pen2 zgc:109727	comp114512_c0_seq2	2e-42
Cdc42 homolog	0.910339	0.00168296	0.859423	0.00623349	Q29HY3	Cdc42 GA11680	comp114464_c0_seq1	9e-69
SH3 and PX domain-containing protein 2B (Factor for adipocyte differentiation 49) (Tyrosine kinase substrate with four SH3 domains)	0.908202	0.00180322	0.946611	0.000365381	A2AAY5	Sh3pxd2b Fad49 Tks4	comp131748_c0_seq1	4e-52
Modulator of smoothened protein (Attenuator of hedgehog)	0.899976	0.00231787	0.901722	0.00220158	Q0D289	mosmob zgc:153595	comp128927_c0_seq1	4e-48
Protein dispatched homolog 1	0.894762	0.00268863	0.95965	0.000159303	Q96F81	DISP1 DISPA	comp124951_c0_seq1	6e-56
Ran GTPase-activating protein 1 (RanGAP1)	0.892318	0.00287486	0.837075	0.00953391	P46061	Rangap1 Fug1	comp130630_c0_seq3	6e-43
von Willebrand factor A domain-containing protein 8	0.865436	0.00549331	0.862168	0.00588821	B0R0T1	si:dkey-18l1.1	comp127452_c0_seq1	0
E3 ubiquitin-protein ligase rnf213-alpha (EC 2.3.2.27) (EC 3.6.4.-) (Mysterin-A) (Mysterin-alpha) (RING finger protein 213-A) (RING finger protein 213-alpha) (RING-type E3 ubiquitin transferase rnf213-alpha)	0.844409	0.00835192	0.940854	0.000494586	A0A0R4IBK5	rnf213a	comp123497_c0_seq1	1e-08
Proto-oncogene vav	0.824899	0.0117207	0.828644	0.0110175	Q08DN7	VAV1	comp131669_c1_seq1	2e-68
Tip elongation aberrant protein 1 (Altered polarity protein 8) (Cell polarity protein tea1)	0.774018	0.0241823	0.835346	0.009827	P87061	tea1 alp8 SPCC1223.06	comp123017_c0_seq1	1e-17
Kinesin-like protein KIF26B	0.744814	0.033999	0.831551	0.0104906	Q7TNC6	Kif26b	comp126152_c0_seq1	2e-11
Fibroblast growth factor receptor homolog 1 (EC 2.7.10.1) (DmHD-38) (Protein heartless) (Tyrosine kinase 1) (dTk1)	0.737657	0.0367232	0.705017	0.0508108	Q07407	htl FR1 Tk1 CG7223	comp133744_c0_seq1	5e-63
Apolipophorins [Cleaved into: Apolipophorin-2 (Apolipophorin II) (apoLp-2); Apolipophorin-1 (Apolipophorin I) (apoLp-1)]	0.665404	0.0717205	0.834318	0.010004	Q9U943		comp110062_c0_seq1	8e-37
Na(+)/H(+) exchange regulatory cofactor NHE-RF1 (NHERF-1) (Ezrin-radixin-moesin-binding phosphoprotein 50) (EBP50) (Regulatory cofactor of Na(+)/H(+) exchanger) (Sodium-hydrogen exchanger regulatory factor 1) (Solute carrier family 9 isoform A3 regulatory factor 1)	0.659887	0.0749752	0.828536	0.0110375	Q3SZK8	SLC9A3R1 NHERF NHERF1	comp136955_c1_seq1	3e-13
Low-density lipoprotein receptor-related protein 4 (LRP-4) (LDLR dan)	0.649725	0.0811926	0.803272	0.0163363	Q8VI56	Lrp4 Kiaa0816	comp135842_c1_seq1	5e-87
Transmembrane protein 198	0.639587	0.0876847	0.782416	0.0217329	Q6DFQ7	tmem198	comp132092_c1_seq2	2e-22
D site-binding protein (Albumin D box-binding protein) (Albumin D-element-binding protein)	0.605282	0.111824	0.80078	0.0169311	Q32PF6	DBP	comp131289_c0_seq1	9e-15
Hemicentin-1 (Fibulin-6) (FIBL-6)	0.555928	0.152489	0.711662	0.0477173	Q96RW7	HMCN1 FIBL6	comp131294_c0_seq1	1e-30
Proto-oncogene tyrosine-protein kinase receptor Ret (EC 2.7.10.1) (Cadherin family member 12) (Proto-oncogene c-Ret) [Cleaved into: Soluble RET kinase fragment; Extracellular cell-membrane anchored RET cadherin 120 kDa fragment]	0.548351	0.159353	0.562837	0.146373	P07949	RET CDHF12 CDHR16 PTC RET51	comp133394_c2_seq1	1e-10
Homeobox protein Nkx-2.2 (Homeobox protein NK-2 homolog B)	0.341616	0.407559	0.494792	0.212562	P43697	NKX2-2 NKX-2.2 NKX2B	comp124735_c0_seq1	1e-36
Casein kinase II subunit beta (CK II beta)	-0.24657	0.556078	-0.406317	0.317854	Q91398	csnk2b ck2b	comp119452_c0_seq1	2e-137
Secreted frizzled-related protein 3 (sFRP-3) (Frizzled-related protein 1) (FrzB-1)	-0.492421	0.215105	-0.596955	0.118192	Q9IA95	FRZB SFRP3	comp119033_c0_seq1	4e-19
Endoplasmic reticulum membrane-associated RNA degradation protein (ER membrane-associated RNA degradation protein)	-0.535432	0.171439	-0.689392	0.0585486	Q5T6L9	ERMARD C6orf70	comp127810_c0_seq2	1e-43
Putative ATP-dependent RNA helicase an3 (EC 3.6.4.13)	-0.616044	0.103888	-0.663453	0.072862	P24346	an3	comp129502_c0_seq1	6e-77
Interferon-related developmental regulator 1	-0.670611	0.0687269	-0.776318	0.0234951	Q5S1U6	IFRD1	comp126261_c0_seq1	6e-95
Proto-oncogene tyrosine-protein kinase receptor Ret (EC 2.7.10.1) (Cadherin family member 12) (Proto-oncogene c-Ret) [Cleaved into: Soluble RET kinase fragment; Extracellular cell-membrane anchored RET cadherin 120 kDa fragment]	-0.720134	0.0439424	-0.659681	0.0750983	P07949	RET CDHF12 CDHR16 PTC RET51	comp122228_c0_seq1	3e-54
Tyrosine-protein kinase RYK (EC 2.7.10.1) (Kinase VIK) (Met-related kinase) (NYK-R)	-0.785929	0.0207561	-0.848763	0.00769665	Q01887	Ryk Mrk	comp133188_c0_seq2	2e-116
Nephrocystin-1	-0.797951	0.0176223	-0.863918	0.00567458	Q9QY53	Nphp1 Nph1	comp137275_c0_seq3	4e-39
Tetraspanin-5 (Tspan-5) (Tetraspan NET-4) (Transmembrane 4 superfamily member 9)	-0.845079	0.00824889	-0.860993	0.0060344	P62080	Tspan5 Tm4sf9	comp134152_c0_seq1	5e-58
Acidic fibroblast growth factor intracellular-binding protein (aFGF intracellular-binding protein) (FGF-1 intracellular-binding protein)	-0.84867	0.00771035	-0.912199	0.00158268	Q9JI19	Fibp	comp135311_c0_seq1	9e-96
Creatine kinase, testis isozyme (EC 2.7.3.2)	-0.871224	0.00483642	-0.954241	0.000231388	P24722	tck1	comp131113_c0_seq1	0
Poly [ADP-ribose] polymerase 11 (PARP-11) (EC 2.4.2.30) (ADP-ribosyltransferase diphtheria toxin-like 11) (ARTD11)	-0.89246	0.00286385	-0.813706	0.0139893	Q8CFF0	Parp11	comp110409_c2_seq2	2e-09
Inner nuclear membrane protein Man1 (LEM domain-containing protein 3)	-0.899028	0.00238266	-0.927567	0.000899176	Q9Y2U8	LEMD3 MAN1	comp54259_c0_seq1	7e-79
DCN1-like protein 3 (DCUN1 domain-containing protein 3) (Defective in cullin neddylation protein 1-like protein 3) (Squamous cell carcinoma-related oncogene 3)	-0.919715	0.00121706	-0.989419	2.94e-06	Q8IWE4	DCUN1D3 SCCRO3	comp127875_c0_seq1	3e-79
Ion Binding
Solute carrier family 22 member 15	0.879571	0.00398163	0.908546	0.00178348	Q6NUB3	slc22a15	comp127170_c0_seq2	1e-65
H(+)/Cl(-) exchange transporter 7 (Chloride channel 7 alpha subunit) (Chloride channel protein 7) (ClC-7)	0.857078	0.00653854	0.956251	0.000202525	P51798	CLCN7	comp135320_c1_seq2	2e-112
Mucolipin-3 (Transient receptor potential channel mucolipin 3) (TRPML3)	0.81182	0.0143967	0.838784	0.00924944	Q8R4F0	Mcoln3	comp137000_c0_seq8	9e-93
Extracellular calcium-sensing receptor (CaSR) (Parathyroid cell calcium-sensing receptor) (PCaR1) (RaKCaR)	0.806689	0.0155427	0.897909	0.00246062	P48442	Casr Gprc2a Pcar1	comp32301_c0_seq1	7e-09
Solute carrier family 22 member 15-like	0.753824	0.03075	0.643006	0.0854628	Q7ZX53	slc22a15b	comp108900_c0_seq1	9e-07
Hemicentin-1 (Fibulin-6) (FIBL-6)	0.752733	0.0311327	0.895546	0.00263059	D3YXG0	Hmcn1	comp125421_c0_seq1	3e-50
Serine/threonine-protein kinase WNK3 (EC 2.7.11.1) (Protein kinase lysine-deficient 3) (Protein kinase with no lysine 3)	0.729693	0.0399067	0.880036	0.00393712	Q9BYP7	WNK3 KIAA1566 PRKWNK3	comp123515_c0_seq1	3e-06
Sodium channel protein type 4 subunit alpha (SkM1) (Sodium channel protein skeletal muscle subunit alpha) (Sodium channel protein type IV subunit alpha) (Voltage-gated sodium channel subunit alpha Nav1.4)	0.719272	0.0443178	0.819134	0.0128576	P35499	SCN4A	comp126634_c0_seq1	2e-08
EF-hand calcium-binding domain-containing protein 11	0.567072	0.142692	0.694567	0.0559132	Q6AXQ2	Efcab11	comp124352_c0_seq1	1e-31
Canalicular multispecific organic anion transporter 1 (ATP-binding cassette sub-family C member 2) (Canalicular multidrug resistance protein) (Multidrug resistance-associated protein 2)	0.514976	0.191552	0.600155	0.115721	Q63120	Abcc2 Cmoat Cmrp Mrp2	comp131943_c0_seq5	6e-45
Tropomyosin alpha-4 chain (Tropomyosin-4)	0.507118	0.199595	0.693328	0.0565373	Q6IRU2	Tpm4	comp127665_c0_seq1	3e-14
Stromal interaction molecule 1	0.448068	0.265545	0.539943	0.167165	Q13586	STIM1 GOK	comp136496_c0_seq1	4e-16
Transmembrane channel-like protein 7	0.445982	0.268049	0.418436	0.302202	Q5YCC5	Tmc7	comp135514_c0_seq1	2e-80
Aspartyl/asparaginyl beta-hydroxylase (EC 1.14.11.16) (Aspartate beta-hydroxylase) (ASP beta-hydroxylase) (Peptide-aspartate beta-dioxygenase)	-0.433071	0.283808	-0.590865	0.122976	Q8BSY0	Asph Bah	comp131464_c0_seq1	3e-53
Potassium voltage-gated channel subfamily KQT member 5 (KQT-like 5) (Potassium channel subunit alpha KvLQT5) (Voltage-gated potassium channel subunit Kv7.5)	-0.479135	0.229647	-0.563964	0.145388	Q9JK45	Kcnq5	comp135124_c0_seq1	7e-14
Chloride channel protein 2 (ClC-2)	-0.60595	0.111322	-0.710356	0.0483163	P35525	Clcn2	comp132619_c2_seq1	5e-60
Testican-2 (SPARC/osteonectin, CWCV, and Kazal-like domains proteoglycan 2)	-0.631357	0.0931695	-0.775028	0.023879	Q92563	SPOCK2 KIAA0275 TICN2 UNQ269/PRO306	comp129150_c0_seq1	2e-17
Calmodulin (CaM)	-0.646373	0.0833071	-0.636404	0.0897831	Q95NR9		comp124214_c0_seq6	4e-100
Sodium channel protein 60E (Drosophila ion channel 60) (Drosophila sodium channel 1) (Protein smell-impaired 60E) (Sodium channel 2) (DmNav2)	-0.653575	0.0788026	-0.776874	0.023331	Q9W0Y8	NaCP60E DIC60 DSC1 smi60E CG34405	comp121707_c0_seq1	7e-101
Calcyphosin-like protein	-0.663824	0.0726438	-0.663856	0.0726254	Q6P8Y1	Capsl	comp109048_c0_seq1	4e-60
COMM domain-containing protein 3	-0.69315	0.0566274	-0.858795	0.0063143	Q3SZ76	COMMD3	comp136145_c0_seq1	9e-45
Neurocalcin homolog (DrosNCa)	-0.750012	0.0321	-0.813143	0.0141102	P42325	Nca CG7641	comp111705_c0_seq1	4e-120
Oncoprotein-induced transcript 3 protein (Liver-specific zona pellucida domain-containing protein)	-0.763361	0.0275271	-0.796064	0.0180933	Q8WWZ8	OIT3 LZP UNQ826/PRO1753	comp135057_c3_seq1	1e-31
Oncoprotein-induced transcript 3 protein (Liver-specific zona pellucida domain-containing protein)	-0.79268	0.018957	-0.832263	0.0103639	Q8WWZ8	OIT3 LZP UNQ826/PRO1753	comp135057_c3_seq2	3e-33
Multidrug resistance-associated protein 1 (ATP-binding cassette sub-family C member 1) (Leukotriene C(4) transporter) (LTC4 transporter)	-0.809026	0.0150139	-0.860815	0.00605675	Q864R9	ABCC1 MRP1	comp134125_c0_seq1	7e-24
Multiple epidermal growth factor-like domains protein 6 (Multiple EGF-like domains protein 6) (Epidermal growth factor-like protein 3) (EGF-like protein 3)	-0.810742	0.0146329	-0.896819	0.0025381	O75095	MEGF6 EGFL3 KIAA0815	comp45894_c0_seq1	8e-21
Solute carrier family 41 member 1	-0.822025	0.0122792	-0.866754	0.00533897	Q5R839	SLC41A1	comp134894_c0_seq1	2e-59
Myosin-2 essential light chain (Myosin II essential light chain) (Non-muscle myosin essential light chain)	-0.822701	0.0121464	-0.755947	0.0300135	P54357	Mlc-c CG3201	comp119498_c0_seq1	5e-30
Regulator of microtubule dynamics protein 3 (RMD-3) (Protein FAM82A2) (Protein FAM82C)	-0.840059	0.00904088	-0.942227	0.000461435	Q5EAU9	rmdn3 fam82a2 fam82c	comp137204_c0_seq1	8e-43
Calmodulin, striated muscle	-0.846485	0.00803524	-0.906654	0.00189372	P02597	CCM1	comp60684_c0_seq1	3e-31
Creatine kinase, testis isozyme (EC 2.7.3.2)	0.818907	0.0129037	0.857591	0.00647106	P24722	tck1	comp131113_c0_seq1	0
Calbindin-32	-0.846991	0.0079592	-0.833792	0.0100954	P41044	Cbp53E cbn CG6702	comp127645_c0_seq1	1e-52
Tropomyosin A (EgTrpA) (Fragment)	-0.852359	0.00718103	-0.739312	0.036082	O16127		comp128488_c0_seq1	1e-10
Translationally-controlled tumor protein homolog (TCTP)	-0.879699	0.00396928	-0.886228	0.00337465	Q95VY2		comp114640_c0_seq1	7e-37
Plasma membrane calcium-transporting ATPase 4 (PMCA4) (EC 3.6.3.8)	-0.892921	0.00282814	-0.872296	0.00472061	Q6Q477	Atp2b4	comp54456_c0_seq1	2e-26
Calmodulin (CaM)	-0.908775	0.00177043	-0.927011	0.000919657	Q95NI4		comp119276_c0_seq1	1e-62
Ras and EF-hand domain-containing protein	-0.950631	0.000289791	-0.966276	9.35e-05	Q08CX1	rasef	comp133953_c0_seq1	3e-68
Metabolism
Pancreatic secretory granule membrane major glycoprotein GP2 (Pancreatic zymogen granule membrane protein GP-2)	0.935323	0.000644	0.840928	0.00890056	P25291	GP2	comp132750_c0_seq10	4e-26
UDP-N-acetylglucosamine--dolichyl-phosphate N-acetylglucosaminephosphotransferase (EC 2.7.8.15) (GlcNAc-1-P transferase) (G1PT) (GPT) (N-acetylglucosamine-1-phosphate transferase)	0.921703	0.00113061	0.91073	0.00166158	Q9H3H5	DPAGT1 DPAGT2	comp136801_c0_seq1	2e-151
Canalicular multispecific organic anion transporter 2 (ATP-binding cassette sub-family C member 3) (MRP-like protein 2) (MLP-2) (Multidrug resistance-associated protein 3)	0.826014	0.0115086	0.924552	0.00101388	O88563	Abcc3 Cmoat2 Mlp2 Mrp3	comp131688_c2_seq3	2e-24
Lactoylglutathione lyase (EC 4.4.1.5) (Aldoketomutase) (Glyoxalase I) (Glx I) (Ketone-aldehyde mutase) (Methylglyoxalase) (S-D-lactoylglutathione methylglyoxal lyase)	0.820672	0.0125479	0.886905	0.00331655	Q9HU72	gloA PA5111	comp116048_c0_seq1	3e-07
Probable dolichyl pyrophosphate Glc1Man9GlcNAc2 alpha-1,3-glucosyltransferase (EC 2.4.1.265) (Asparagine-linked glycosylation protein 8 homolog) (Dol-P-Glc:Glc(1)Man(9)GlcNAc(2)-PP-dolichyl alpha-1,3-glucosyltransferase) (Dolichyl-P-Glc:Glc1Man9GlcNAc2-PP-dolichyl glucosyltransferase)	0.72529	0.0417365	0.705422	0.0506185	Q9BVK2	ALG8 HUSSY-02	comp133068_c0_seq1	0
Biogenesis of lysosome-related organelles complex 1 subunit 1 (BLOC-1 subunit 1)	0.552529	0.155548	0.682166	0.0623503	Q5R7L8	BLOC1S1	comp111064_c0_seq1	2e-42
Pyruvate kinase PKM (EC 2.7.1.40) (Pyruvate kinase muscle isozyme)	-0.691213	0.0576126	-0.708567	0.0491436	P11979	PKM PKM2	comp134593_c0_seq2	0
N-acetyllactosaminide beta-1,3-N-acetylglucosaminyltransferase 2 (EC 2.4.1.149) (Beta-1,3-N-acetylglucosaminyltransferase 1) (BGnT-1) (Beta-1,3-Gn-T1) (Beta3Gn-T1) (Beta-1,3-galactosyltransferase 7) (Beta-1,3-GalTase 7) (Beta3Gal-T7) (Beta3GalT7) (b3Gal-T7) (Beta-3-Gx-T7) (UDP-Gal:beta-GlcNAc beta-1,3-galactosyltransferase 7) (UDP-GlcNAc:betaGal beta-1,3-N-acetylglucosaminyltransferase 2) (BGnT-2…	-0.773102	0.0244591	-0.887119	0.00329831	Q9Z222	B3GNT2 B3gnt1 Beta3gnt	comp107165_c0_seq1	5e-34
Beta-glucuronidase (EC 3.2.1.31)	-0.829389	0.0108809	-0.875852	0.00434929	O97524	GUSB	comp136470_c0_seq5	0
Canalicular multispecific organic anion transporter 2 (ATP-binding cassette sub-family C member 3) (MRP-like protein 2) (MLP-2) (Multidrug resistance-associated protein 3)	-0.936222	0.000617948	-0.885281	0.00345705	O88563	Abcc3 Cmoat2 Mlp2 Mrp3	comp131688_c2_seq1	2e-24
ATP-binding cassette sub-family D member 3 (68 kDa peroxisomal membrane protein) (PMP68) (70 kDa peroxisomal membrane protein) (PMP70)	-0.937495	0.000582238	-0.817432	0.013206	P55096	Abcd3 Pmp70 Pxmp1	comp134935_c0_seq1	3e-131
Amino Acid/cofactors Biosynthesis
Dihydropteridine reductase (EC 1.5.1.34) (HDHPR) (Quinoid dihydropteridine reductase)	0.980109	1.94e-05	0.941999	0.000466836	P11348	Qdpr Dhpr	comp119642_c0_seq1	2e-83
3-hydroxyanthranilate 3,4-dioxygenase (EC 1.13.11.6) (3-hydroxyanthranilate oxygenase) (3-HAO) (3-hydroxyanthranilic acid dioxygenase) (HAD)	0.945843	0.000381158	0.896632	0.00255158	A7RIT9	v1g178517	comp122000_c0_seq1	4e-122
Putative sodium-coupled neutral amino acid transporter 7 (Solute carrier family 38 member 7)	0.930622	0.000792023	0.847203	0.00792763	Q6DEL1	slc38a7 zgc:100802	comp129625_c0_seq1	4e-51
Putative L-aspartate dehydrogenase (EC 1.4.1.21) (Aspartate dehydrogenase domain-containing protein)	0.924971	0.000997371	0.946726	0.000363048	Q5FW48	aspdh	comp135255_c1_seq4	1e-85
Monocarboxylate transporter 10 (MCT 10) (Aromatic amino acid transporter 1) (Solute carrier family 16 member 10) (T-type amino acid transporter 1)	0.908202	0.00180322	0.946611	0.000365381	Q3U9N9	Slc16a10 Mct10 Tat1	comp131469_c0_seq2	3e-52
Cystine/glutamate transporter (Amino acid transport system xc-) (Solute carrier family 7 member 11) (xCT)	0.838171	0.00935088	0.895296	0.00264899	Q9WTR6	Slc7a11	comp136955_c0_seq9	9e-109
Cubilin (460 kDa receptor) (Glycoprotein 280) (gp280) (Intrinsic factor-cobalamin receptor) (Intrinsic factor-vitamin B12 receptor)	0.827328	0.0112616	0.864403	0.00561623	O70244	Cubn Ifcr	comp135786_c0_seq2	1e-21
Probable glucosamine 6-phosphate N-acetyltransferase (EC 2.3.1.4) (Phosphoglucosamine acetylase) (Phosphoglucosamine transacetylase)	0.820487	0.0125848	0.856253	0.0066482	Q9VAI0	CG1969	comp131803_c0_seq1	2e-33
Pantetheinase (EC 3.5.1.92) (Pantetheine hydrolase) (Vascular non-inflammatory molecule 1) (Vanin-1)	0.795932	0.0181264	0.915597	0.00140964	Q9BDJ5	VNN1	comp135396_c0_seq4	6e-37
UDP-N-acetylglucosamine transferase subunit ALG14 homolog	0.786322	0.0206486	0.905718	0.00194986	Q6AY85	Alg14	comp121466_c0_seq3	7e-16
Cystathionine gamma-synthase (CGS) (EC 2.5.1.48) (O-succinylhomoserine (thiol)-lyase)	0.783867	0.0213263	0.87841	0.00409418	Q1M0P5	metB	comp122097_c0_seq1	1e-110
Proton-coupled folate transporter (Heme carrier protein 1) (PCFT/HCP1) (Solute carrier family 46 member 1)	0.782386	0.0217414	0.916845	0.00134934	Q6DCX5	slc46a1 hcp1 pcft	comp118738_c0_seq1	3e-45
2-methoxy-6-polyprenyl-1,4-benzoquinol methylase, mitochondrial (EC 2.1.1.201) (Ubiquinone biosynthesis methyltransferase COQ5)	0.746319	0.0334422	0.870684	0.00489546	Q54VN2	coq5 DDB_G0280237	comp133303_c0_seq8	5e-09
Sepiapterin reductase (SPR) (EC 1.1.1.153) (Benzil reductase ((S)-benzoin forming)) (EC 1.1.1.320)	0.704113	0.0512404	0.786023	0.0207306	Q8R536	SPR	comp105581_c0_seq1	1e-58
N-alpha-acetyltransferase 16, NatA auxiliary subunit (NMDA receptor-regulated 1-like protein) (NARG1-like protein)	0.68153	0.0626916	0.721539	0.0433345	Q6N069	NAA16 NARG1L NAT2	comp130497_c0_seq1	0
Imidazoleglycerol-phosphate dehydratase (IGPD) (EC 4.2.1.19)	0.681515	0.0626994	0.603219	0.113383	Q12578	HIS3 CAGL0L02937g	comp132796_c0_seq6	3e-73
Pyridoxal 5'-phosphate synthase subunit SNZERR (PLP synthase subunit SNZERR) (EC 4.3.3.6) (Ethylene response protein) (PDX1)	0.630755	0.0935782	0.63133	0.093188	Q8WPW2	SNZERR ERR	comp132733_c1_seq2	2e-53
Deoxyribose-phosphate aldolase (DERA) (EC 4.1.2.4) (2-deoxy-D-ribose 5-phosphate aldolase) (Phosphodeoxyriboaldolase) (Deoxyriboaldolase)	0.616441	0.103602	0.753235	0.0309565	Q9Y315	DERA CGI-26	comp126988_c0_seq1	9e-168
CUB and sushi domain-containing protein 1 (CUB and sushi multiple domains protein 1)	0.584769	0.127872	0.54787	0.159795	Q96PZ7	CSMD1 KIAA1890 UNQ5952/PRO19863	comp90230_c0_seq1	2e-20
Transaldolase (EC 2.2.1.2)	-0.589535	0.124035	-0.582285	0.129898	Q9EQS0	Taldo1	comp136401_c4_seq1	7e-163
Kynurenine formamidase (KFA) (KFase) (EC 3.5.1.9) (Arylformamidase) (N-formylkynurenine formamidase) (FKF)	-0.619929	0.101106	-0.760688	0.0284081	Q736W4	kynB BCE_2786	comp128109_c0_seq2	6e-14
4-hydroxyphenylpyruvate dioxygenase (EC 1.13.11.27) (4-hydroxyphenylpyruvic acid oxidase) (4HPPD) (HPD) (HPPDase)	-0.719875	0.0440549	-0.762525	0.0278006	Q5BKL0	hpd	comp123541_c0_seq1	0
b(0,+)-type amino acid transporter 1 (b(0,+)AT1) (Glycoprotein-associated amino acid transporter b0,+AT1) (Solute carrier family 7 member 9)	-0.735307	0.037646	-0.814361	0.0138495	P82251	SLC7A9 BAT1	comp129548_c1_seq1	9e-112
Bifunctional coenzyme A synthase (CoA synthase) (NBP) (POV-2) [Includes: Phosphopantetheine adenylyltransferase (EC 2.7.7.3) (Dephospho-CoA pyrophosphorylase) (Pantetheine-phosphate adenylyltransferase) (PPAT); Dephospho-CoA kinase (DPCK) (EC 2.7.1.24) (Dephosphocoenzyme A kinase) (DPCOAK)]	-0.743922	0.0343315	-0.734464	0.0379802	Q8MIR4	COASY	comp132253_c2_seq1	2e-102
Putative sodium-coupled neutral amino acid transporter 10 (Solute carrier family 38 member 10)	-0.753164	0.0309812	-0.842531	0.00864514	Q6PCF9	slc38a10	comp131307_c0_seq3	4e-63
5-formyltetrahydrofolate cyclo-ligase (EC 6.3.3.2) (5,10-methenyl-tetrahydrofolate synthetase) (MTHFS) (Methenyl-THF synthetase)	-0.766616	0.0264769	-0.855896	0.00669585	Q9D110	Mthfs	comp122446_c0_seq1	2e-66
5'-methylthioadenosine/S-adenosylhomocysteine nucleosidase (MTA/SAH nucleosidase) (MTAN) (EC 3.2.2.9) (5'-methylthioadenosine nucleosidase) (MTA nucleosidase) (S-adenosylhomocysteine nucleosidase) (AdoHcy nucleosidase) (SAH nucleosidase) (SRH nucleosidase)	-0.779307	0.0226208	-0.918407	0.00127624	Q0I5K4	mtnN HS_1473	comp134474_c0_seq2	7e-07
Cytosolic iron-sulfur assembly component 2A (MIP18 family protein FAM96A)	-0.841728	0.0087724	-0.794475	0.0184957	Q9H5X1	CIAO2A CIA2A FAM96A	comp120736_c0_seq1	2e-50
Putative glutamate synthase [NADPH] (EC 1.4.1.13) (NADPH-GOGAT)	-0.853063	0.00708273	-0.937981	0.00056897	Q9C102	glt1 SPAPB1E7.07	comp60713_c0_seq1	2e-172
Beta-ureidopropionase (EC 3.5.1.6) (BUP-1) (Beta-alanine synthase) (N-carbamoyl-beta-alanine amidohydrolase)	-0.883332	0.00363075	-0.969453	6.96e-05	Q9UBR1	UPB1 BUP1	comp122416_c0_seq1	0
Pterin-4-alpha-carbinolamine dehydratase 2 (PHS 2) (EC 4.2.1.96) (4-alpha-hydroxy-tetrahydropterin dehydratase 2) (DcoH-like protein DCoHm) (Dimerization cofactor of hepatocyte nuclear factor 1 from muscle) (HNF-1-alpha dimerization cofactor)	-0.897557	0.00248549	-0.867487	0.00525438	Q9CZL5	Pcbd2 Dcoh2 Dcohm	comp114615_c0_seq1	9e-41
Cell cycle
DNA replication complex GINS protein PSF2 (GINS complex subunit 2)	0.911479	0.00162103	0.934127	0.000679755	Q9Y248	GINS2 PSF2 CGI-122 DC5 HSPC037	comp129611_c0_seq1	2e-37
Tetratricopeptide repeat protein 28 (TPR repeat protein 28) (TPR repeat-containing big gene cloned at Keio)	0.844252	0.00837618	0.864443	0.00561147	Q96AY4	TTC28 KIAA1043 TPRBK	comp135633_c0_seq17	2e-23
Ubiquitin carboxyl-terminal hydrolase 3 (EC 3.4.19.12) (Deubiquitinating enzyme 3) (Ubiquitin thioesterase 3) (Ubiquitin-specific-processing protease 3)	0.823237	0.0120418	0.879444	0.00399385	Q91W36	Usp3	comp131680_c0_seq1	9e-151
Tetratricopeptide repeat protein 28 (TPR repeat protein 28)	0.792391	0.019032	0.829626	0.0108377	Q80XJ3	Ttc28 Kiaa1043 Tprbk	comp127045_c0_seq1	1e-09
Centrosomal protein POC5 (Protein of centriole 5)	0.779743	0.022495	0.913861	0.0014964	Q6DFB7	poc5	comp133607_c0_seq1	1e-58
Mitotic checkpoint protein BUB3 (WD repeat type I transmembrane protein A72.5)	0.773238	0.0244179	0.892226	0.00288207	Q9WVA3	Bub3	comp129884_c0_seq1	5e-178
Meiotic recombination protein DMC1/LIM15 homolog	0.767697	0.0261336	0.882496	0.00370697	Q14565	DMC1 DMC1H LIM15	comp121553_c0_seq1	7e-13
Targeting protein for Xklp2 homolog (TPX2 homolog) (Microtubule-associated protein TPX2 homolog)	0.765946	0.0266909	0.919445	0.00122914	E2RYF8	TPX2	comp111896_c0_seq1	5e-34
Tetratricopeptide repeat protein 28 (TPR repeat protein 28) (TPR repeat-containing big gene cloned at Keio)	0.734055	0.038143	0.868056	0.00518935	Q96AY4	TTC28 KIAA1043 TPRBK	comp137206_c2_seq1	2e-33
Centrin-1	0.651162	0.0802957	0.728305	0.0404782	Q32LE3	CETN1	comp125674_c0_seq1	2e-94
Serine/threonine-protein phosphatase PP1-beta (EC 3.1.3.16) (Glc seven-like phosphatase 2)	0.490129	0.217579	0.594106	0.120416	Q627N3	gsp-2 CBG00598	comp133826_c0_seq1	0
Kelch domain-containing protein 3	0.479224	0.229548	0.627485	0.0958164	Q58CV6	KLHDC3	comp135150_c0_seq3	3e-130
Tetratricopeptide repeat protein 28 (TPR repeat protein 28) (TPR repeat-containing big gene cloned at Keio)	-0.713113	0.0470575	-0.786488	0.0206035	Q96AY4	TTC28 KIAA1043 TPRBK	comp88362_c0_seq1	2e-06
Electron transfer flavoprotein-ubiquinone oxidoreductase, mitochondrial (ETF-QO) (ETF-ubiquinone oxidoreductase) (EC 1.5.5.1) (Electron-transferring-flavoprotein dehydrogenase) (ETF dehydrogenase)	-0.768101	0.0260061	-0.870707	0.00489295	Q2KIG0	ETFDH	comp126194_c0_seq5	0
CTD small phosphatase-like protein (CTDSP-like) (EC 3.1.3.16) (Carboxy-terminal domain RNA polymerase II polypeptide A small phosphatase 3) (NIF-like protein) (Nuclear LIM interactor-interacting factor 1) (NLI-interacting factor 1) (Small C-terminal domain phosphatase 3) (SCP3) (Small CTD phosphatase 3)	-0.763933	0.0273407	-0.833882	0.0100798	P58465	Ctdspl Nif1 Nifl	comp135950_c0_seq1	2e-104
Cyclin-dependent kinase inhibitor 1B (Cyclin-dependent kinase inhibitor p27) (p27Kip1)	-0.821816	0.0123205	-0.894887	0.00267933	P46527	CDKN1B KIP1	comp125003_c0_seq1	1e-09
Transcription initiation factor TFIID subunit 10 (Transcription initiation factor TFIID 30 kDa subunit) (TAF(II)30) (TAFII-30) (TAFII30) (mTAFII30)	-0.825964	0.011518	-0.836481	0.00963385	Q8K0H5	Taf10 Taf2h Tafii30	comp119102_c0_seq1	3e-45
Charged multivesicular body protein 4b (Chromatin-modifying protein 4b) (CHMP4b)	-0.833105	0.0102156	-0.801982	0.0166426	Q5XGW6	chmp4b	comp129098_c0_seq1	1e-39
Cyclin-dependent kinase 1 (CDK1) (EC 2.7.11.22) (EC 2.7.11.23) (Cell division control protein 2 homolog) (Cell division protein kinase 1) (p34 protein kinase)	-0.840547	0.0089619	-0.764523	0.0271494	Q9DGA5	cdk1 cdc2	comp121009_c0_seq1	4e-151
Host cell factor 1 (HCF) (HCF-1) (C1 factor) [Cleaved into: HCF N-terminal chain 1; HCF N-terminal chain 2; HCF N-terminal chain 3; HCF N-terminal chain 4; HCF N-terminal chain 5; HCF N-terminal chain 6; HCF C-terminal chain 1; HCF C-terminal chain 2; HCF C-terminal chain 3; HCF C-terminal chain 4; HCF C-terminal chain 5; HCF C-terminal chain 6]	-0.894088	0.00273916	-0.895703	0.00261911	Q61191	Hcfc1	comp33435_c0_seq1	3e-75
Tetratricopeptide repeat protein 28 (TPR repeat protein 28) (TPR repeat-containing big gene cloned at Keio)	-0.903244	0.00210339	-0.956799	0.000195093	Q96AY4	TTC28 KIAA1043 TPRBK	comp135633_c0_seq9	2e-10
Spindle and kinetochore-associated protein 1	-0.909745	0.00171587	-0.897196	0.00251115	B0BM28	ska1	comp108494_c0_seq1	1e-30
Ribonucleoside-diphosphate reductase small chain (EC 1.17.4.1)	-0.959297	0.000163486	-0.903738	0.00207209	Q6R7K3	ORF20	comp135924_c1_seq5	2e-08
Neural System
DBH-like monooxygenase protein 1 (EC 1.14.17.-) (Monooxygenase X)	0.965156	0.00010302	0.941707	0.000473816	Q6UVY6	MOXD1 MOX UNQ2493/PRO5780	comp132413_c1_seq5	3e-42
Sorting nexin-14	0.956607	0.000197672	0.913146	0.00153313	Q5R903	SNX14	comp136675_c1_seq10	5e-11
Acetylcholinesterase (AChE) (EC 3.1.1.7)	0.936792	0.000601774	0.901378	0.00222418	P04058	ache	comp135528_c3_seq1	8e-84
Adhesion G protein-coupled receptor L3 (Latrophilin-3) (Lectomedin-3)	0.927932	0.000885916	0.98763	4.69e-06	Q80TS3	Adgrl3 Kiaa0768 Lec3 Lphn3	comp136353_c0_seq7	3e-33
Partitioning defective 3 homolog (PAR-3) (PARD-3) (Atypical PKC isotype-specific-interacting protein) (ASIP) (Ephrin-interacting protein) (PHIP)	0.925843	0.000963662	0.937768	0.00057476	Q99NH2	Pard3 Par3	comp126237_c0_seq1	1e-56
CUB and sushi domain-containing protein 3 (CUB and sushi multiple domains protein 3)	0.917236	0.00133081	0.945565	0.000386961	Q7Z407	CSMD3 KIAA1894	comp135669_c0_seq1	2e-18
Failed axon connections homolog	0.897181	0.00251217	0.929092	0.000844576	D3ZAT9	Faxc	comp125002_c0_seq1	2e-38
DBH-like monooxygenase protein 1 (EC 1.14.17.-) (DBH-related protein) (Monooxygenase X)	0.895139	0.00266065	0.793032	0.0188661	Q9CXI3	Moxd1 Dbhr Mox	comp135671_c0_seq1	4e-14
Netrin receptor UNC5B (Protein unc-5 homolog 2) (Protein unc-5 homolog B)	0.880045	0.00393627	0.916946	0.00134451	O08722	Unc5b Unc5h2	comp136910_c0_seq1	1e-10
BTB/POZ domain-containing protein 6	0.8512	0.00734473	0.765564	0.0268137	Q0V9W6	btbd6	comp125574_c0_seq1	7e-24
Tyrosine-protein kinase transmembrane receptor Ror (dRor) (EC 2.7.10.1)	0.839571	0.00912036	0.739628	0.03596	Q24488	Ror CG4926	comp120366_c0_seq1	5e-29
Failed axon connections homolog	0.830784	0.0106281	0.871872	0.00476623	D3ZAT9	Faxc	comp134684_c3_seq1	4e-48
von Willebrand factor A domain-containing protein 8	0.7461	0.0335228	0.804806	0.015977	B0R0T1	si:dkey-18l1.1	comp127452_c0_seq1	0
Fasciculation and elongation protein zeta-2 (Zygin II) (Zygin-2)	0.823914	0.0119102	0.889791	0.00307598	Q9UHY8	FEZ2	comp131502_c0_seq1	1e-13
Copine-9 (Copine IX)	0.814642	0.0137899	0.846723	0.00799953	Q1RLL3	Cpne9	comp124136_c1_seq1	7e-20
Sodium- and chloride-dependent GABA transporter 1 (GAT-1) (Solute carrier family 6 member 1)	0.797414	0.0177557	0.901273	0.00223113	P31648	Slc6a1 Gabt1 Gat-1 Gat1	comp125191_c0_seq1	8e-105
Fibroblast growth factor 20 (FGF-20)	0.794464	0.0184985	0.817787	0.0131328	Q9NP95	FGF20	comp134234_c0_seq1	5e-13
Tenascin-R (TN-R) (Janusin) (Neural recognition molecule J1-160/180) (Restrictin)	0.787492	0.0203306	0.865292	0.00551035	Q8BYI9	Tnr	comp136785_c0_seq1	1e-69
General receptor for phosphoinositides 1-associated scaffold protein (GRP1-associated scaffold protein)	0.756951	0.0296692	0.902321	0.00216255	Q7Z6J2	GRASP	comp126301_c0_seq1	4e-15
Pyroglutamylated RF-amide peptide receptor (AQ27) (G-protein coupled receptor 103) (Orexigenic neuropeptide QRFP receptor) (SP9155)	0.746515	0.0333701	0.894015	0.00274473	P83858	Qrfpr Gpr103	comp125605_c0_seq2	9e-25
Tubulin polyglutamylase TTLL7 (EC 6.-.-.-) (Tubulin--tyrosine ligase-like protein 7)	0.652577	0.0794182	0.697235	0.0545823	F7E540	ttll7	comp135798_c0_seq1	7e-23
Dopamine receptor 1 (D-DOP1) (DmDop1) (dDA1) (Dopamine 1-like receptor 1)	0.627038	0.0961246	0.652714	0.0793337	P41596	Dop1R1 DopR DopR1 DopR35EF CG9652	comp132380_c0_seq2	4e-11
Kinase non-catalytic C-lobe domain-containing protein 1 (KIND domain-containing protein 1) (Cerebral protein 9) (Protein very KIND) (v-KIND) (Ras-GEF domain-containing family member 2)	0.569236	0.140831	0.64537	0.0839457	Q76NI1	KNDC1 C10orf23 KIAA1768 RASGEF2 VKIND hucep-9	comp131263_c0_seq1	2e-72
Multiple PDZ domain protein (Multi-PDZ domain protein 1)	0.467452	0.242837	0.514595	0.191939	Q8VBX6	Mpdz Mupp1	comp135867_c1_seq1	1e-07
Gamma-aminobutyric acid receptor subunit beta-3 (GABA(A) receptor subunit beta-3)	-0.328392	0.427101	-0.480496	0.228134	P19019	GABRB3	comp135316_c0_seq9	7e-26
Rabphilin-3A (Exophilin-1)	-0.741958	0.0350706	-0.717893	0.0449228	P47708	Rph3a	comp131982_c1_seq1	6e-22
TBC1 domain family member 23	0.741139	0.0353817	0.683117	0.0618415	Q5F415	TBC1D23 RCJMB04_3n7	comp125839_c0_seq1	0
Adhesion G protein-coupled receptor L3 (Calcium-independent alpha-latrotoxin receptor 3) (CIRL-3) (Latrophilin-3) (Lectomedin-3)	-0.563826	0.145509	-0.652083	0.0797237	Q9HAR2	ADGRL3 KIAA0768 LEC3 LPHN3	comp130556_c0_seq2	1e-56
E3 ubiquitin-protein ligase RBBP6 (EC 2.3.2.27) (Proliferation potential-related protein) (Protein P2P-R) (RING-type E3 ubiquitin transferase RBBP6) (Retinoblastoma-binding protein 6) (p53-associated cellular protein of testis)	-0.739747	0.0359145	-0.616185	0.103787	P97868	Rbbp6 P2pr Pact	comp121250_c0_seq1	9e-25
Matrilin-2	-0.670813	0.0686119	-0.848311	0.00776314	O00339	MATN2 UNQ193/PRO219	comp126371_c0_seq1	6e-63
Tenascin-R (TN-R) (Restrictin)	-0.814918	0.0137314	-0.633337	0.0918324	Q00546	TNR	comp135034_c1_seq2	2e-66
Dyslexia-associated protein KIAA0319-like protein (Adeno-associated virus receptor) (AAVR)	-0.830421	0.0106935	-0.922581	0.00109376	Q8K135	Kiaa0319l Aavr	comp136373_c0_seq1	7e-102
Tubulin polyglutamylase TTLL7 (EC 6.-.-.-) (Tubulin--tyrosine ligase-like protein 7)	-0.848616	0.00771829	-0.754369	0.0305599	F7E540	ttll7	comp131650_c0_seq1	4e-58
Orexin receptor type 1 (Ox-1-R) (Ox1-R) (Ox1R) (Hypocretin receptor type 1)	-0.908171	0.001805	-0.88143	0.00380563	P58307	Hcrtr1	comp123818_c0_seq1	6e-25
Reticulon-4 receptor (Nogo receptor) (NgR) (Nogo-66 receptor)	-0.956552	0.000198422	-0.942076	0.000465007	Q9BZR6	RTN4R NOGOR UNQ330/PRO526	comp131737_c0_seq7	4e-22
Orphan
Ectonucleotide pyrophosphatase/phosphodiesterase family member 3 (E-NPP 3) (Phosphodiesterase I beta) (PD-Ibeta) (Phosphodiesterase I/nucleotide pyrophosphatase 3) (CD antigen CD203c) [Includes: Alkaline phosphodiesterase I (EC 3.1.4.1); Nucleotide pyrophosphatase (NPPase) (EC 3.6.1.9) (Nucleotide diphosphatase)]	0.959062	0.000166299	0.918525	0.00127082	Q5R5M5	ENPP3	comp131815_c0_seq2	8e-63
Creatine kinase, testis isozyme (EC 2.7.3.2)	0.959003	0.000167014	0.983757	1.06e-05	P24722	tck1	comp131113_c0_seq1	0
Transmembrane protein 120B	0.958969	0.000167426	0.92078	0.00117026	Q3TA38	Tmem120b	comp132411_c0_seq1	3e-92
Iroquois-class homeodomain protein IRX-6 (Homeodomain protein IRXB3) (Iroquois homeobox protein 6)	0.975503	3.61e-05	0.9486	0.000326539	P78412	IRX6 IRX7 IRXB3	comp127432_c0_seq2	2e-39
InaD-like protein (Inadl protein) (Channel-interacting PDZ domain-containing protein) (Pals1-associated tight junction protein) (Protein associated to tight junctions)	0.956607	0.000197672	0.913146	0.00153313	Q63ZW7	Patj Cipp Inadl	comp133215_c0_seq1	6e-11
Carbonic anhydrase 2 (EC 4.2.1.1) (Carbonate dehydratase II) (Carbonic anhydrase II) (CA-II)	0.952478	0.00025883	0.920226	0.00119446	P00919	CA2	comp117442_c0_seq1	9e-74
Epsin-2 (EPS-15-interacting protein 2)	0.936746	0.000603073	0.918959	0.00125105	O95208	EPN2 KIAA1065	comp137262_c1_seq1	2e-83
Osmo-dependent choline transporter BetT2	0.934367	0.000672486	0.801369	0.0167892	Q6FDF5	betT2 betT ACIAD1012	comp113654_c0_seq1	3e-16
Facilitated trehalose transporter Tret1 (BmTRET1)	0.928335	0.000871406	0.838627	0.00927533	A9ZSY3	Tret1	comp126799_c1_seq1	2e-59
Good for full DBP5 activity protein 2	0.926547	0.000936969	0.938329	0.000559585	P25370	GFD2 YCL036W YCL187 YCL36W	comp131578_c0_seq4	8e-06
Protein sprouty homolog 3 (Spry-3)	0.916603	0.00136089	0.903665	0.00207669	O43610	SPRY3	comp113039_c0_seq1	2e-19
Schlafen-like protein 1	0.905464	0.00196528	0.876082	0.00432592	Q4R3B7	SLFNL1 QtsA-18087	comp108598_c0_seq2	8e-09
Lactadherin (MFGM) (Milk fat globule-EGF factor 8) (MFG-E8) (O-acetyl GD3 ganglioside synthase) (AGS) (SED1)	0.903038	0.00211649	0.953702	0.000239557	P70490	Mfge8 Ags	comp136074_c0_seq3	8e-13
MORC family CW-type zinc finger protein 2A (Zinc finger CW-type coiled-coil domain protein 1)	0.8989	0.00239147	0.790831	0.0194397	Q69ZX6	Morc2a Kiaa0852 Zcwcc1	comp135102_c0_seq1	0
SID1 transmembrane family member 1	0.898801	0.00239833	0.984588	9.05e-06	Q9NXL6	SIDT1	comp137153_c1_seq2	2e-140
Guanylate cyclase soluble subunit beta-1 (GCS-beta-1) (EC 4.6.1.2) (Guanylate cyclase soluble subunit beta-3) (GCS-beta-3) (Soluble guanylate cyclase small subunit)	0.897838	0.00246559	0.827067	0.0113104	P20595	Gucy1b1 Guc1b3 Gucy1b3	comp135184_c0_seq1	1e-57
Myoferlin (Fer-1-like protein 3)	0.879533	0.00398528	0.944456	0.000410746	B3DLH6	myof fer1l3	comp124317_c0_seq1	0
DEAD-box ATP-dependent RNA helicase CshC (EC 3.6.4.13)	0.878137	0.00412094	0.854995	0.0068175	Q81E85	cshC BC_2103	comp133239_c0_seq1	1e-13
Peroxisomal targeting signal 1 receptor (PTS1 receptor) (PTS1R) (PTS1-BP) (PXR1P) (Peroxin-5) (Peroxisomal C-terminal targeting signal import receptor) (Peroxisome receptor 1)	0.877235	0.00421011	0.746852	0.0332465	O09012	Pex5 Pxr1	comp134744_c0_seq1	0
Tropomyosin	0.876091	0.004325	0.888711	0.00316466	Q8WR63		comp121481_c0_seq1	2e-10
Luciferin 4-monooxygenase (Luciferase) (EC 1.13.12.7)	0.875597	0.0043753	0.945728	0.00038355	P08659		comp116068_c0_seq1	1e-86
Importin subunit alpha-3 (Importin alpha Q1) (Qip1) (Karyopherin subunit alpha-4)	0.875324	0.00440317	0.911199	0.0016361	O35343	Kpna4 Qip1	comp122621_c0_seq1	7e-162
Transient receptor potential cation channel subfamily A member 1 (dTRPA1) (Ankyrin-like with transmembrane domains protein 1) (dANKTM1)	0.869543	0.00502169	0.751865	0.0314395	Q7Z020	TrpA1 Anktm1 CG5751	comp131242_c0_seq5	6e-28
Piwi-like protein 1 (EC 3.1.26.-)	0.866206	0.00540276	0.778857	0.0227511	Q96J94	PIWIL1 HIWI	comp132896_c1_seq1	0
Equilibrative nucleoside transporter 3 (Solute carrier family 29 member 3)	0.851549	0.00729518	0.929207	0.000840533	A1A4N1	SLC29A3 ENT3	comp134982_c1_seq1	2e-76
Transmembrane protease serine 6 (EC 3.4.21.-) (Matriptase-2)	0.846983	0.00796053	0.8426	0.00863432	Q9DBI0	Tmprss6	comp124734_c0_seq1	1e-11
Neuroendocrine convertase 1 (NEC 1) (EC 3.4.21.93) (Prohormone convertase 1) (Proprotein convertase 1) (PC1)	0.835333	0.00982934	0.874441	0.0044943	P28840	Pcsk1 Bdp Nec-1 Nec1	comp136722_c0_seq1	1e-73
Multiple epidermal growth factor-like domains protein 8 (Multiple EGF-like domains protein 8) (Epidermal growth factor-like protein 4) (EGF-like protein 4)	0.835278	0.00983878	0.908502	0.00178603	Q9QYP0	Megf8 Egfl4	comp129595_c0_seq1	3e-130
Mothers against decapentaplegic homolog 3 (MAD homolog 3) (Mad3) (Mothers against DPP homolog 3) (SMAD family member 3) (SMAD 3) (Smad3)	0.833378	0.0101677	0.932148	0.000741754	P84023	SMAD3 MADH3	comp134214_c0_seq1	0
Phosphatidylcholine transfer protein (PC-TP) (START domain-containing protein 2) (StARD2) (StAR-related lipid transfer protein 2)	0.830223	0.0107293	0.887855	0.00323604	P02720	PCTP STARD2	comp132360_c0_seq2	5e-45
DENN domain-containing protein 1C (Connecdenn 3) (Protein FAM31C)	0.829764	0.0108126	0.924333	0.00102253	Q8IV53	DENND1C FAM31C	comp111620_c0_seq1	3e-06
Peroxisome assembly protein 12 (Peroxin-12) (Peroxisome assembly factor 3) (PAF-3)	0.824899	0.0117207	0.828644	0.0110175	O00623	PEX12 PAF3	comp137120_c0_seq1	2e-68
Mucin-like protein (Fragment)	0.822988	0.0120902	0.943232	0.000438111	B3EWY9		comp134498_c0_seq1	7e-162
Peroxisomal membrane protein 11C (Peroxin-11C) (Peroxisomal biogenesis factor 11C) (Protein PEX11 homolog gamma) (PEX11-gamma)	0.819055	0.0128736	0.825661	0.0115754	Q96HA9	PEX11G PEX11C	comp125467_c0_seq1	2e-46
Tropomyosin (allergen Hel as 1)	0.81604	0.0134953	0.920091	0.00120042	O97192		comp106159_c0_seq1	7e-12
Failed axon connections homolog	0.855629	0.00673173	0.963719	0.000116166	D3ZAT9	Faxc	comp125002_c0_seq1	2e-38
Failed axon connections homolog	0.855629	0.00673173	0.963719	0.000116166	D3ZAT9	Faxc	comp125002_c0_seq1	2e-38
U-actitoxin-Avd3h (U-AITX-Avd3h) (AsKC5)	0.808948	0.0150312	0.941619	0.000475924	P0DN09		comp133980_c2_seq1	8e-14
Phosphoenolpyruvate phosphomutase (PEP mutase) (PEP phosphomutase) (Phosphoenolpyruvate mutase) (EC 5.4.2.9)	0.808762	0.015073	0.722684	0.0428425	P56839		comp118687_c0_seq2	2e-173
Cell cycle checkpoint protein RAD17	0.806997	0.0154722	0.825983	0.0115144	Q9XT62	RAD17	comp116216_c0_seq1	2e-50
Adiponectin receptor protein	0.800188	0.0170744	0.892386	0.00286957	Q9VCY8	AdipoR CG5315	comp134589_c0_seq1	3e-116
Replication factor C subunit 4 (Activator 1 subunit 4)	0.79837	0.0175189	0.811569	0.0144515	Q99J62	Rfc4	comp127016_c0_seq1	3e-161
Methylthioribose-1-phosphate isomerase (M1Pi) (MTR-1-P isomerase) (EC 5.3.1.23) (S-methyl-5-thioribose-1-phosphate isomerase) (Translation initiation factor eIF-2B subunit alpha/beta/delta-like protein)	0.794122	0.018586	0.775372	0.0237762	A7RF00	v1g237765	comp123107_c0_seq2	4e-139
Myotrophin	0.792096	0.0191088	0.883184	0.00364422	Q7T2B9	mtpn	comp125601_c0_seq1	4e-38
Vesicle-associated membrane protein 7B	0.787217	0.0204051	0.832931	0.0102461	Q86AQ7	vamp7B DDB_G0277173	comp118686_c0_seq1	9e-43
Trace amine-associated receptor 7d (TaR-7d) (Trace amine receptor 7d) (mTaar7d)	0.782402	0.0217369	0.739114	0.0361582	Q5QD10	Taar7d	comp126821_c0_seq2	1e-19
Alkaline phosphatase, tissue-nonspecific isozyme (AP-TNAP) (TNSALP) (EC 3.1.3.1) (Alkaline phosphatase liver/bone/kidney isozyme)	0.779886	0.0224539	0.897204	0.00251055	P09487	ALPL	comp132815_c0_seq1	5e-128
Puromycin-sensitive aminopeptidase (PSA) (EC 3.4.11.14) (Cytosol alanyl aminopeptidase) (AAP-S)	0.77975	0.0224929	0.916758	0.00135347	Q11011	Npepps Psa	comp133010_c0_seq1	3e-37
Dynein light chain roadblock-type 2 (Dynein light chain 2B, cytoplasmic)	0.767871	0.0260787	0.849453	0.00759594	Q32P85	DYNLRB2 DNLC2B	comp108731_c0_seq1	1e-39
Alpha-1-macroglobulin (Alpha-1-M) (Alpha-1-macroglobulin 165 kDa subunit) [Cleaved into: Alpha-1-macroglobulin 45 kDa subunit]	0.766734	0.0264394	0.839802	0.0090828	Q63041	A1m Pzp	comp135501_c1_seq1	0
Nucleoporin p58/p45 (58 kDa nucleoporin) (Nucleoporin-like protein 1)	0.760769	0.0283812	0.899319	0.00236263	Q9BVL2	NUP58 KIAA0410 NUPL1	comp136458_c1_seq1	2e-54
MFS-type transporter SLC18B1 (Solute carrier family 18 member B1)	0.756518	0.0298173	0.899108	0.00237711	D3Z5L6	Slc18b1	comp136047_c1_seq5	9e-16
Guanine nucleotide-binding protein G(s) subunit alpha (Adenylate cyclase-stimulating G alpha protein)	0.756294	0.0298941	0.869322	0.00504639	O16118		comp114413_c0_seq1	0
Cytoplasmic dynein 2 heavy chain 1 (Dynein heavy chain isotype 1B)	0.748596	0.0326108	0.780761	0.0222027	Q27802	DYH1B	comp127431_c0_seq1	0
V-type proton ATPase 116 kDa subunit a isoform 4 (V-ATPase 116 kDa isoform a4) (Vacuolar proton translocating ATPase 116 kDa subunit a isoform 4) (Vacuolar proton translocating ATPase 116 kDa subunit a kidney isoform)	0.744604	0.0340771	0.813723	0.0139857	Q9HBG4	ATP6V0A4 ATP6N1B ATP6N2	comp123653_c0_seq1	3e-19
Pituitary tumor-transforming gene 1 protein-interacting protein (Pituitary tumor-transforming gene protein-binding factor) (PBF) (PTTG-binding factor)	0.743641	0.0344366	0.727323	0.0408852	Q5NVI6	PTTG1IP	comp135018_c0_seq1	2e-09
Fibropellin-1 (Epidermal growth factor-related protein 1) (Fibropellin-I) (SpEGF I) (UEGF-1)	0.732352	0.0388258	0.870691	0.0048947	P10079	EGF1	comp131032_c0_seq1	3e-93
Integrator complex subunit 7 (Int7)	0.724939	0.0418844	0.743037	0.0346634	Q5ZL91	INTS7 RCJMB04_7c6	comp122670_c0_seq1	2e-113
Dynein light chain roadblock-type 2 (Dynein light chain 2B, cytoplasmic)	0.724578	0.0420368	0.842372	0.00867026	Q9DAJ5	Dynlrb2 Dncl2b Dnlc2b	comp133325_c0_seq1	9e-32
Sodium-coupled monocarboxylate transporter 1 (Apical iodide transporter) (Electrogenic sodium monocarboxylate cotransporter) (Sodium iodide-related cotransporter) (Solute carrier family 5 member 8)	0.718607	0.0446089	0.796781	0.0179134	Q8N695	SLC5A8 AIT SMCT SMCT1	comp129109_c0_seq1	1e-78
Methylated-DNA--protein-cysteine methyltransferase (EC 2.1.1.63) (6-O-methylguanine-DNA methyltransferase) (MGMT) (O-6-methylguanine-DNA-alkyltransferase)	0.717968	0.0448897	0.780941	0.0221515	Q6TDU1	MGMT	comp134837_c0_seq1	1e-31
Ragulator complex protein LAMTOR5 homolog (Late endosomal/lysosomal adaptor and MAPK and MTOR activator 5)	0.715314	0.046067	0.903525	0.00208554	A7RT29	v1g226489	comp120211_c0_seq2	2e-41
Serine/threonine-protein kinase HT1 (EC 2.7.11.1) (High leaf temperature protein 1)	0.714969	0.0462215	0.762531	0.0277986	Q2MHE4	HT1 At1g62400 F24O1.13	comp125758_c0_seq1	1e-13
Target of Myb protein 1	0.712619	0.0472818	0.837621	0.00944247	O60784	TOM1	comp134173_c0_seq4	5e-59
Protein argonaute-2 (Argonaute2) (EC 3.1.26.n2) (Argonaute RISC catalytic component 2) (Eukaryotic translation initiation factor 2C 2) (eIF-2C 2) (eIF2C 2) (Golgi ER protein 95 kDa) (GERp95) (Protein slicer)	0.698318	0.0540479	0.804615	0.0160214	Q9QZ81	Ago2 Eif2c2	comp137281_c1_seq1	0
GPN-loop GTPase 1 (EC 3.6.5.-) (MBD2-interacting protein) (MBDin) (XPA-binding protein 1)	0.698208	0.0541019	0.753819	0.0307517	Q8VCE2	Gpn1 Mbdin Xab1	comp126379_c0_seq1	1e-132
Probable lysosomal cobalamin transporter	0.694442	0.055976	0.816151	0.0134722	A7RM45	v1g160387	comp133482_c0_seq1	0
Tetraspanin-36 (Tetraspanin-3c)	0.690004	0.0582328	0.794449	0.0185023	Q6NWG0	tspan36 tspan3c	comp117639_c0_seq1	2e-31
General transcription factor IIH subunit 4 (Basic transcription factor 2 52 kDa subunit) (BTF2 p52) (General transcription factor IIH polypeptide 4) (TFIIH basal transcription factor complex p52 subunit)	0.68508	0.0607998	0.807618	0.015331	O70422	Gtf2h4	comp133473_c0_seq1	1e-43
Monocarboxylate transporter 8 (MCT 8) (Solute carrier family 16 member 2)	0.677424	0.0649227	0.731684	0.0390957	Q8K1P8	SLC16A2 Mct8	comp122958_c0_seq2	2e-21
Unconventional myosin-IXa (Unconventional myosin-9a)	0.667967	0.0702376	0.79021	0.0196035	Q8C170	Myo9a Myr7	comp119772_c0_seq1	6e-85
ATP-binding cassette sub-family F member 2	0.656817	0.0768231	0.736155	0.0373113	Q99LE6	Abcf2	comp133155_c0_seq1	0
Monocarboxylate transporter 3 (MCT 3) (Retinal epithelial membrane protein) (Solute carrier family 16 member 8)	0.654809	0.0780455	0.758201	0.0292437	Q90632	SLC16A3 MCT3 REMP	comp132616_c0_seq1	6e-33
Serine palmitoyltransferase small subunit A (Small subunit of serine palmitoyltransferase A) (ssSPTa)	0.769721	0.0254985	0.923443	0.00105831	B9EN89	sptssa ssspta	comp127305_c0_seq1	7e-13
Rabphilin-3A (Exophilin-1)	0.758022	0.0293044	0.89309	0.00281521	P47708	Rph3a	comp131982_c1_seq1	6e-22
PCNA-associated factor (HCV NS5A-transactivated protein 9 homolog) (PCNA-associated factor of 15 kDa) (PAF15) (p15PAF) (PCNA-clamp-associated factor)	0.653288	0.0789796	0.651489	0.0800921	Q9CQX4	Pclaf Ns5atp9 Paf	comp103767_c0_seq1	3e-06
Neuroglobin	0.636064	0.0900094	0.825738	0.0115608	Q90YJ2	ngb si:ch211-233n24.2	comp129385_c0_seq1	2e-22
Replication protein A 32 kDa subunit-B (RP-A p32) (Replication factor A protein 2) (RF-A protein 2) (Replication protein A 34 kDa subunit) (RP-A p34)	0.625269	0.0973507	0.774877	0.0239241	A1L2H9	rpa2-b repa2 rpa32 rpa34	comp131104_c0_seq2	7e-66
Urease subunit alpha (EC 3.5.1.5) (Urea amidohydrolase subunit alpha)	0.612659	0.106349	0.634522	0.0910376	A7HHN1	ureC Anae109_4049	comp129455_c0_seq1	0
Cleavage and polyadenylation specificity factor subunit 2 (Cleavage and polyadenylation specificity factor 100 kDa subunit) (CPSF 100 kDa subunit)	-0.754909	0.0303722	-0.876724	0.00426122	O35218	Cpsf2 Cpsf100 Mcpsf	comp132500_c0_seq1	3e-165
Protein ZINC INDUCED FACILITATOR-LIKE 1 (Protein ZIF-LIKE 1)	0.588512	0.124853	0.631582	0.0930168	Q94BZ1	ZIFL1 At5g13750 MXE10.2	comp131558_c1_seq1	6e-42
Retinol dehydrogenase 8 (EC 1.1.1.300) (Photoreceptor outer segment all-trans retinol dehydrogenase)	0.578018	0.133419	0.635775	0.0902015	Q9N126	RDH8 PRRDH	comp128433_c0_seq1	1e-34
Zinc finger CCCH domain-containing protein 10	0.574021	0.136765	0.631971	0.0927538	Q8R205	Zc3h10	comp128427_c0_seq1	7e-28
cAMP-specific 3',5'-cyclic phosphodiesterase 4D (EC 3.1.4.53) (DPDE3)	0.571187	0.139166	0.563694	0.145624	Q01063	Pde4d	comp131085_c1_seq2	0
NTF2-related export protein 1	0.504222	0.202603	0.726243	0.0413361	Q9QZV9	Nxt1	comp131978_c0_seq1	4e-42
Protein sidekick-1	0.483212	0.225132	0.528186	0.178427	Q7Z5N4	SDK1	comp131856_c0_seq1	2e-14
Zinc finger MYND domain-containing protein 19 (Melanin-concentrating hormone receptor 1-interacting zinc finger protein) (MCH-R1-interacting zinc finger protein)	0.452222	0.260594	0.477138	0.231875	Q9CQG3	Zmynd19 Mizip	comp128102_c0_seq1	2e-72
MAM and LDL-receptor class A domain-containing protein 1 (Skeletal organic matrix MAM and LDL-receptor 1) (SOM MAM and LDL-receptor 1) (Fragment)	0.450459	0.26269	0.519926	0.186576	B3EWZ5		comp133870_c0_seq1	1e-64
Hypoxia-inducible factor 1-alpha inhibitor (EC 1.14.11.30) (EC 1.14.11.n4) (Hypoxia-inducible factor asparagine hydroxylase)	0.44359	0.270936	0.455098	0.257192	Q8BLR9	Hif1an	comp136621_c0_seq3	1e-141
Heparan sulfate glucosamine 3-O-sulfotransferase 3B1 (EC 2.8.2.30) (Heparan sulfate D-glucosaminyl 3-O-sulfotransferase 3B1) (3-OST-3B) (Heparan sulfate 3-O-sulfotransferase 3B1) (m3-OST-3B)	0.381994	0.350387	0.499998	0.207034	Q9QZS6	Hs3st3b1 3ost3b1 Hs3st3b	comp123833_c0_seq1	4e-71
Peroxisome biogenesis factor 2 (Peroxin-2) (Peroxisomal membrane protein 3) (Peroxisome assembly factor 1) (PAF-1)	0.344156	0.403851	0.454569	0.257817	P24392	Pex2 Paf1 Pmp35 Pxmp3	comp136989_c1_seq1	2e-39
CUB and peptidase domain-containing protein 1 (Fragment)	0.326391	0.430092	0.418584	0.302013	B8V7S0		comp66147_c0_seq1	5e-71
Calcineurin subunit B type 1 (Protein phosphatase 2B regulatory subunit 1) (Protein phosphatase 3 regulatory subunit B alpha isoform 1)	-0.369149	0.368155	-0.620133	0.100961	P63100	Ppp3r1 Cna2 Cnb	comp130951_c0_seq1	3e-93
Angiopoietin-1 receptor (EC 2.7.10.1) (Endothelial tyrosine kinase) (Tyrosine kinase with Ig and EGF homology domains-2) (Tyrosine-protein kinase receptor TIE-2) (CD antigen CD202b)	-0.46438	0.246367	-0.605734	0.111484	Q06807	TEK TIE-2 TIE2	comp119209_c0_seq3	1e-55
Protein white	-0.506023	0.20073	-0.625972	0.0968628	Q17320	W	comp128696_c0_seq1	7e-07
Transmembrane protein 241	-0.530918	0.175776	-0.549963	0.157879	Q3UME2	Tmem241	comp135585_c0_seq4	3e-20
Bifunctional heparan sulfate N-deacetylase/N-sulfotransferase 3 (EC 2.8.2.8) (Glucosaminyl N-deacetylase/N-sulfotransferase 3) (NDST-3) (hNDST-3) (N-heparan sulfate sulfotransferase 3) (N-HSST 3) [Includes: Heparan sulfate N-deacetylase 3 (EC 3.-.-.-); Heparan sulfate N-sulfotransferase 3 (EC 2.8.2.-)]	-0.53235	0.174394	-0.660389	0.0746754	O95803	NDST3 HSST3 UNQ2544/PRO4998	comp124315_c0_seq1	2e-172
Guanine nucleotide-binding protein G(q) subunit alpha (Guanine nucleotide-binding protein alpha-q)	-0.580288	0.131539	-0.61097	0.107588	P82471	Gnaq	comp132972_c0_seq1	0
Cryptochrome-1	-0.585594	0.127203	-0.742624	0.0348191	Q6ZZY0	CRY1	comp128135_c0_seq1	0
Cubilin (Intrinsic factor-cobalamin receptor)	-0.620463	0.100726	-0.806429	0.0156021	Q9JLB4	Cubn Ifcr	comp129598_c0_seq1	1e-21
Proton myo-inositol cotransporter (H(+)-myo-inositol cotransporter) (Hmit) (H(+)-myo-inositol symporter) (Solute carrier family 2 member 13)	-0.63526	0.0905448	-0.718626	0.0446006	Q921A2	Slc2a13	comp132560_c1_seq1	8e-101
Fatty-acid amide hydrolase 2-A (EC 3.5.1.99)	-0.635815	0.0901748	-0.585619	0.127182	Q6DH69	faah2a zgc:92625	comp128308_c0_seq1	8e-128
Omega-amidase NIT2 (EC 3.5.1.3) (Nitrilase homolog 2)	-0.643783	0.0849627	-0.7693	0.02563	Q28IE5	nit2 TNeu073c04.1	comp134538_c0_seq1	1e-131
Fibronectin type III domain-containing protein (Neuroglian-like protein)	-0.657172	0.0766078	-0.782337	0.0217553	B8VIW9		comp121689_c0_seq1	6e-28
Ras-related protein Rab-13	-0.669258	0.0694973	-0.801425	0.016776	P35286	Rab13	comp133236_c0_seq1	5e-71
COUP transcription factor 2 (COUP-TF2) (COUP transcription factor II) (COUP-TF II) (Nuclear receptor subfamily 2 group F member 2)	-0.67003	0.0690572	-0.825582	0.0115904	Q9TTR7	NR2F2 TFCOUP2	comp100547_c0_seq1	0
Glutamyl aminopeptidase (EAP) (EC 3.4.11.7) (Aminopeptidase A) (AP-A) (CD antigen CD249)	-0.675888	0.0657692	-0.780726	0.0222128	P50123	Enpep	comp119749_c0_seq1	3e-67
Insulin-degrading enzyme (EC 3.4.24.56) (Abeta-degrading protease) (Insulin protease) (Insulinase) (Insulysin)	-0.684931	0.0608789	-0.825516	0.0116031	P14735	IDE	comp71913_c0_seq1	3e-41
Carbonic anhydrase 2 (EC 4.2.1.1) (Carbonate dehydratase II) (Carbonic anhydrase II) (CA-II)	-0.692897	0.0567557	-0.643206	0.085334	P00920	Ca2 Car2	comp130856_c0_seq3	2e-45
Trypsin inhibitor (Cocoon shell-associated trypsin inhibitor) (CSTI)	-0.700036	0.053206	-0.724163	0.0422128	P81902		comp124658_c0_seq1	1e-13
Zinc transporter 5 (ZnT-5) (Solute carrier family 30 member 5)	-0.703164	0.051694	-0.744909	0.0339634	Q8R4H9	Slc30a5 Znt5	comp120459_c0_seq2	4e-168
Osteoclast-stimulating factor 1	-0.707398	0.0496887	-0.869475	0.00502933	Q7ZYG4	ostf1	comp130071_c0_seq1	2e-76
Phosphatidylinositol transfer protein beta isoform (PI-TP-beta) (PtdIns transfer protein beta) (PtdInsTP beta)	-0.707454	0.0496628	-0.737195	0.0369035	P53811	Pitpnb	comp134187_c0_seq3	4e-94
Serine palmitoyltransferase small subunit A (Small subunit of serine palmitoyltransferase A) (ssSPTa)	0.690282	0.0580903	0.822083	0.0122677	B9EN89	sptssa ssspta	comp127305_c0_seq1	7e-13
Dynactin subunit 3	-0.707964	0.0494243	-0.788372	0.0200933	Q0P5A1	DCTN3	comp102318_c0_seq1	5e-26
Stromelysin-2 (SL-2) (EC 3.4.24.22) (Matrix metalloproteinase-10) (MMP-10) (Transformation-associated protein 34A) (Transin-2)	-0.729868	0.0398349	-0.899033	0.00238228	P07152	Mmp10	comp131218_c1_seq1	1e-64
Matrilin-4 (MAT-4)	-0.7341	0.0381251	-0.894168	0.00273316	O89029	Matn4	comp135133_c1_seq1	1e-15
UV-stimulated scaffold protein A	-0.736318	0.0372473	-0.900771	0.00226447	E1C760	UVSSA	comp136595_c0_seq1	4e-14
Serine/threonine-protein phosphatase 4 regulatory subunit 4	-0.773664	0.0242891	-0.836021	0.00971199	Q6NUP7	PPP4R4 KIAA1622 PP4R4	comp136096_c0_seq1	0
Protein sidekick-1	-0.7766	0.0234118	-0.904297	0.00203708	Q7Z5N4	SDK1	comp131856_c0_seq2	2e-14
3'-5' ssDNA/RNA exonuclease TatD (EC 3.1.11.-) (EC 3.1.13.-) (DNase TatD)	-0.782083	0.0218269	-0.868965	0.00508642	D0Z9R0	tatD ETAE_0153	comp126462_c0_seq1	1e-62
Tyrosine-protein kinase receptor Tie-1 (EC 2.7.10.1) (Fragment)	-0.797951	0.0176223	-0.863918	0.00567458	O73792	tie1 tie-1	comp128438_c1_seq22	3e-39
RUN and FYVE domain-containing protein 2 (Rab4-interacting protein related)	-0.80507	0.0159157	-0.869499	0.00502659	Q8WXA3	RUFY2 KIAA1537 RABIP4R	comp134257_c0_seq4	1e-92
Calpain-9 (EC 3.4.22.-) (Digestive tract-specific calpain) (New calpain 4) (nCL-4)	-0.807684	0.015316	-0.898611	0.00241151	O35920	Capn9 Ncl4	comp128434_c0_seq1	1e-107
DNA repair protein RAD51 homolog A (xRAD51.1)	-0.82689	0.0113435	-0.869524	0.00502382	Q91918	rad51-a rad51-1 rad51.1	comp135743_c0_seq4	2e-117
Large subunit GTPase 1 homolog (EC 3.6.1.-)	-0.836088	0.00970052	-0.919963	0.00120607	Q5ZJD3	LSG1 RCJMB04_19c19	comp128238_c0_seq2	1e-100
Putative ammonium transporter 1	-0.845516	0.00818207	-0.757544	0.0294666	P54145	amt-1 C05E11.4	comp120567_c0_seq1	2e-92
snRNA-activating protein complex subunit 1 (SNAPc subunit 1) (Small nuclear RNA-activating complex polypeptide 1) (snRNA-activating protein complex 43 kDa subunit) (SNAPc 43 kDa subunit)	-0.649413	0.0813878	-0.740308	0.0356992	Q4R6W9	SNAPC1 QtsA-16981	comp131555_c0_seq2	1e-34
Calcium-regulated heat-stable protein 1 (Calcium-regulated heat-stable protein of 24 kDa) (CRHSP-24)	-0.84593	0.00811911	-0.795507	0.0182337	Q9Y2V2	CARHSP1	comp124665_c0_seq1	4e-27
Translationally-controlled tumor protein homolog (TCTP)	-0.633496	0.0917258	-0.753749	0.0307764	Q95VY2		comp114640_c0_seq1	7e-37
Serine/threonine-protein kinase mTOR (EC 2.7.11.1) (FK506-binding protein 12-rapamycin complex-associated protein 1) (FKBP12-rapamycin complex-associated protein) (Mammalian target of rapamycin) (mTOR) (Mechanistic target of rapamycin) (Rapamycin and FKBP12 target 1) (Rapamycin target protein 1)	-0.847895	0.00782457	-0.936562	0.000608266	P42345	MTOR FRAP FRAP1 FRAP2 RAFT1 RAPT1	comp127636_c0_seq1	0
Soma ferritin (EC 1.16.3.1)	-0.851712	0.00727219	-0.854194	0.00692671	P42577		comp131418_c0_seq2	1e-87
Probable ATP-dependent RNA helicase DDX27 (EC 3.6.4.13) (DEAD box protein 27)	-0.853895	0.00696776	-0.781896	0.0218799	Q96GQ7	DDX27 cPERP-F RHLP HSPC259 PP3241	comp134491_c0_seq1	1e-169
von Willebrand factor A domain-containing protein 8	-0.878547	0.00408078	-0.956489	0.000199272	B0R0T1	si:dkey-18l1.1	comp127452_c0_seq1	0
von Willebrand factor A domain-containing protein 8	-0.887756	0.00324443	-0.970805	6.09e-05	B0R0T1	si:dkey-18l1.1	comp129424_c0_seq1	8e-154
Putative aminopeptidase W07G4.4 (EC 3.4.11.-)	-0.888054	0.00321936	-0.926082	0.000954539	Q27245	lap-2 W07G4.4	comp128981_c0_seq1	3e-131
Ephrin-B2 (EPH-related receptor tyrosine kinase ligand 5) (LERK-5) (HTK ligand) (HTK-L)	-0.900571	0.0022778	-0.933501	0.000698989	P52799	EFNB2 EPLG5 HTKL LERK5	comp125020_c0_seq1	2e-09
Carbohydrate sulfotransferase 14 (EC 2.8.2.-) (Dermatan 4-sulfotransferase 1) (D4ST-1) (zD4ST-1)	-0.913994	0.00148965	-0.866808	0.00533277	Q805E5	chst14 d4st1	comp132457_c0_seq1	6e-35
Probable ATP-dependent RNA helicase DDX17 (EC 3.6.4.13) (DEAD box protein 17)	-0.311542	0.452556	-0.443095	0.271535	Q501J6	Ddx17	comp129921_c0_seq2	0
DNA damage-binding protein 1 (Damage-specific DNA-binding protein 1)	-0.946026	0.000377358	-0.95566	0.000210756	Q6P6Z0	ddb1	comp132987_c0_seq1	0
Unknown
TLC domain-containing protein 2	0.991063	1.77e-06	0.921327	0.00114666	A8WGS4	tlcd2 zgc:175098	comp129734_c1_seq1	5e-08
Forkhead box protein O1-B	0.548204	0.159489	0.71242	0.0473719	A3RK75	foxo1b foxO1a.2	comp121159_c0_seq2	3e-25
Serine palmitoyltransferase small subunit A (Small subunit of serine palmitoyltransferase A) (ssSPTa)	-0.545821	0.161683	-0.642168	0.0860046	B9EN89	sptssa ssspta	comp127305_c0_seq1	7e-13
Zinc finger protein 670	0.980493	1.83e-05	0.937456	0.000583313	Q9BS34	ZNF670	comp130336_c0_seq6	4e-27
Protein FAM193A (Protein IT14)	0.971919	5.42e-05	0.964468	0.000109183	P78312	FAM193A C4orf8 RES4-22	comp127635_c0_seq1	1e-21
Alpha-adducin (Erythrocyte adducin subunit alpha)	-0.542607	0.164668	-0.679797	0.0636278	P35611	ADD1 ADDA	comp134429_c0_seq1	5e-68
Probable ATP-dependent RNA helicase DDX46 (EC 3.6.4.13) (DEAD box protein 46) (PRP5 homolog)	0.538784	0.168258	0.711361	0.0478548	Q7L014	DDX46 KIAA0801	comp134000_c0_seq1	0
THAP domain-containing protein 4	0.965156	0.00010302	0.941707	0.000473816	Q6P3Z3	Thap4	comp126344_c0_seq1	2e-42
Coiled-coil domain-containing protein 60	0.95755	0.000185204	0.885948	0.00339893	Q3ZAV0	Ccdc60	comp134828_c0_seq2	3e-19
Tctex1 domain-containing protein 1-B (Fragment)	0.956607	0.000197672	0.913146	0.00153313	A2VDD2	tctex1d1-b	comp125887_c0_seq4	5e-11
Putative uncharacterized protein YLR154W-B	0.956607	0.000197672	0.913146	0.00153313	P0C5P9	YLR154W-B smORF398	comp40184_c0_seq1	5e-11
RWD domain-containing protein 2B	0.947069	0.000356172	0.892238	0.00288107	P57060	RWDD2B C21orf6 GL011	comp128157_c0_seq1	2e-46
Lysosome membrane protein 2 (85 kDa lysosomal membrane sialoglycoprotein) (LGP85) (CD36 antigen-like 2) (Lysosome membrane protein II) (LIMP II) (Scavenger receptor class B member 2) (CD antigen CD36)	-0.532361	0.174383	-0.705795	0.0504426	P27615	Scarb2 Cd36l2 Limpii	comp132379_c0_seq1	3e-88
Methyltransferase-like protein 27 (Williams-Beuren syndrome chromosomal region 27 protein)	0.946612	0.000365352	0.893145	0.00281094	Q8N6F8	METTL27 WBSCR27	comp126057_c0_seq2	1e-08
PIH1 domain-containing protein 2	0.918688	0.00126338	0.891034	0.00297598	Q8CHR9	Pih1d2	comp135032_c0_seq1	1e-39
Uncharacterized protein RAB5IF homolog (Rab5-interacting protein) (RIP5)	0.897181	0.00251217	0.929092	0.000844576	Q9CQT9	Rab5if	comp134819_c0_seq5	2e-38
Small integral membrane protein 15	0.879919	0.00394826	0.900052	0.00231273	A9JTJ0	smim15	comp122406_c0_seq1	2e-10
Leukocyte receptor cluster member 8	0.860855	0.00605175	0.949251	0.000314453	Q96PV6	LENG8 KIAA1932	comp136374_c0_seq2	8e-78
EF-hand domain-containing family member C2	0.852074	0.00722108	0.807199	0.0154263	Q32TF8	efhc2 zgc:152706	comp123156_c0_seq2	0
Protein PET117 homolog, mitochondrial	0.512234	0.194339	0.677308	0.0649861	E9QJ05	pet117 si:dkeyp-20e4.6	comp135219_c1_seq1	1e-14
Protein CASC1 (Cancer susceptibility candidate gene 1 protein homolog)	0.837676	0.00943327	0.675569	0.0659456	A6H8T2	casc1 si:dkey-172o10.5	comp51268_c0_seq1	3e-20
Transmembrane protein 151B	0.821642	0.0123549	0.899935	0.00232066	A3KN95	tmem151b	comp126503_c0_seq1	2e-09
UPF0184 protein C9orf16 homolog	0.818174	0.0130534	0.880426	0.00389997	Q2NKS9		comp110212_c0_seq1	1e-08
Putative uncharacterized transposon-derived protein F52C9.6	0.814864	0.0137428	0.865606	0.00547324	Q10126	F52C9.6	comp136010_c0_seq8	3e-06
Transmembrane protein 53-A	0.813734	0.0139833	0.81972	0.012739	Q5PPS7	tmem53-a	comp134568_c1_seq1	2e-12
Fibronectin type III domain-containing protein (Neuroglian-like protein)	0.813498	0.0140339	0.823431	0.012004	B8VIW9		comp135133_c4_seq1	2e-73
Creatine kinase, testis isozyme (EC 2.7.3.2)	0.499624	0.207428	0.621009	0.10034	P24722	tck1	comp131113_c0_seq1	0
Uncharacterized protein C6orf106 homolog	-0.499615	0.207437	-0.634638	0.0909596	Q3TT38	D17Wsu92e	comp133255_c0_seq5	2e-18
WD repeat-containing protein 86	0.802716	0.0164679	0.891	0.00297864	Q86TI4	WDR86	comp117909_c0_seq2	1e-94
Aldehyde dehydrogenase family 16 member A1	0.801784	0.0166899	0.922386	0.00110188	A6QR56	ALDH16A1	comp133298_c0_seq4	4e-121
Costars family protein ABRACL (ABRA C-terminal-like protein)	0.801155	0.0168408	0.920821	0.00116847	Q4KML4	Abracl	comp124569_c0_seq1	4e-40
Haloacid dehalogenase-like hydrolase domain-containing protein 3	0.79903	0.0173568	0.898139	0.00244444	Q5E9D6	HDHD3	comp116840_c0_seq1	5e-44
Transmembrane protein 192	0.79325	0.0188098	0.748099	0.0327913	Q6NYE7	tmem192 zgc:77068	comp135991_c2_seq1	8e-34
PiggyBac transposable element-derived protein 4	0.78437	0.0211862	0.912454	0.00156922	Q96DM1	PGBD4	comp133779_c1_seq2	4e-40
Uncharacterized skeletal organic matrix protein 2 (Uncharacterized SOMP-2)	0.7509	0.0317825	0.779513	0.0225612	B7WFQ1		comp130397_c0_seq2	3e-27
Ankyrin and armadillo repeat-containing protein	0.736443	0.0371981	0.824559	0.0117859	Q7Z5J8	ANKAR	comp126316_c0_seq2	1e-89
Bleomycin hydrolase (BH) (BLM hydrolase) (BMH) (EC 3.4.22.40) (Aminopeptidase H)	0.714569	0.0464008	0.835925	0.00972823	P87362	BLMH	comp131003_c0_seq1	0
Coiled-coil domain-containing protein 186 (Fragment)	0.594982	0.11973	0.663709	0.0727112	Q5R9B3	CCDC186	comp133412_c0_seq1	1e-72
Selenoprotein T2	0.576027	0.135079	0.634978	0.0907326	Q502K9	selenot2 selt2 sept2 zgc:112046	comp132061_c0_seq1	1e-40
PQ-loop repeat-containing protein 1	0.572096	0.138393	0.543106	0.164202	Q8N2U9	PQLC1	comp110610_c0_seq2	6e-14
Uncharacterized protein C3orf20	0.563641	0.14567	0.713472	0.0468951	Q8ND61	C3orf20	comp126608_c0_seq1	3e-27
UPF0691 protein C9orf116 homolog	0.562702	0.146491	0.466303	0.244155	B5X5D0		comp132464_c0_seq4	1e-12
UPF0462 protein C4orf33 homolog	0.469939	0.239998	0.651199	0.0802724	Q8BGN2	D3Ertd751e	comp131913_c0_seq1	5e-56
AN1-type zinc finger protein 3 homolog	-0.68314	0.0618296	-0.759662	0.028751	Q66J85	zfand3	comp135181_c0_seq3	1e-34
Putative aldolase class 2 protein CC_1201	-0.70693	0.0499081	-0.697716	0.0543447	Q9A8Z4	CC_1201	comp134956_c1_seq1	9e-23
Genetic suppressor element 1	-0.713113	0.0470575	-0.786488	0.0206035	Q3U3C9	Gse1 Kiaa0182	comp136987_c1_seq6	2e-06
LHFPL tetraspan subfamily member 3 protein (Lipoma HMGIC fusion partner-like 3 protein)	-0.739618	0.0359639	-0.75071	0.0318504	Q6DHB5	lhfpl3 zgc:92534	comp125612_c1_seq1	1e-29
Inositol-pentakisphosphate 2-kinase (EC 2.7.1.158) (Inositol-1,3,4,5,6-pentakisphosphate 2-kinase) (Ins(1,3,4,5,6)P5 2-kinase) (InsP5 2-kinase)	-0.773671	0.0242869	-0.762946	0.0276626	Q4JL91	ippk ipk1 si:dkey-42i9.3 zgc:110769	comp132456_c0_seq1	4e-16
Chymotrypsinogen B (EC 3.4.21.1) [Cleaved into: Chymotrypsin B chain A; Chymotrypsin B chain B; Chymotrypsin B chain C]	0.461534	0.249662	0.58508	0.12762	P00767		comp137244_c0_seq1	5e-45
Glucocorticoid-induced transcript 1 protein (Glucocorticoid-induced gene 18 protein) (Testhymin) (Thymocyte/spermatocyte selection protein 1)	-0.795261	0.0182961	-0.830426	0.0106926	Q8K3I9	Glcci1 Gig18 Tssn1	comp136545_c4_seq2	2e-31
Tetratricopeptide repeat protein 6 (TPR repeat protein 6)	-0.829784	0.010809	-0.880899	0.00385534	Q86TZ1	TTC6 C14orf25 NCRNA00291	comp124297_c0_seq1	9e-112
Nuclear envelope integral membrane protein 1	-0.858719	0.00632415	-0.947757	0.00034265	Q6ZQE4	Nemp1 Kiaa0286 Tmem194 Tmem194a	comp131298_c0_seq2	3e-20
Coiled-coil domain-containing protein 60	-0.871461	0.00481066	-0.95868	0.000170945	Q3ZAV0	Ccdc60	comp134828_c0_seq1	8e-20
Uncharacterized protein KIAA1841	-0.873067	0.00463845	-0.871637	0.00479163	Q6NSI8	KIAA1841	comp131616_c0_seq2	6e-31
Guanine nucleotide-binding protein-like 1	-0.886039	0.00339106	-0.927158	0.000914241	Q5TM59	GNL1	comp125683_c0_seq2	9e-119
Androglobin (Calpain-7-like protein)	-0.898579	0.00241376	-0.808238	0.0151909	Q8N7X0	ADGB C6orf103 CAPN7L	comp129067_c0_seq1	8e-107
Pleckstrin homology-like domain family B member 1 (Protein LL5-alpha) (Fragment)	-0.913994	0.00148965	-0.866808	0.00533277	Q63312	Phldb1 Ll5	comp134324_c0_seq1	2e-35
Protein CWC15 homolog A	0.441007	0.274069	0.674276	0.0666641	Q6NUB2	cwc15-a	comp124302_c0_seq2	3e-63
UPF0472 protein C16orf72 homolog	-0.913994	0.00148965	-0.866808	0.00533277	Q6PAX8		comp104378_c0_seq1	1e-34
Methyltransferase-like protein 27 (Williams-Beuren syndrome chromosomal region 27 protein)	-0.918037	0.00129331	-0.895386	0.00264242	Q8N6F8	METTL27 WBSCR27	comp135575_c0_seq1	7e-09
Alpha-adducin (Erythrocyte adducin subunit alpha)	0.42985	0.287808	0.506865	0.199858	P35611	ADD1 ADDA	comp134429_c0_seq1	5e-68
Protein FAM181B	-0.920617	0.00117732	-0.884642	0.0035134	A7MB34	FAM181B	comp128879_c0_seq1	8e-08
Ankyrin repeat and MYND domain-containing protein 1	-0.931849	0.000751433	-0.932325	0.00073606	Q8C0W1	Ankmy1	comp131526_c0_seq1	5e-10
